# Supplementary material for: Interleukin-17A Causes Osteoarthritis-Like Transcriptional Changes in Human Osteoarthritis-Derived Chondrocytes and Synovial Fibroblasts In Vitro
Source: PubMed Central journal article supplement (PMC8153485; doi:10.3389/fimmu.2021.676173), 2021-05-12
Supplement: DataSheet_1.pdf [file DataSheet_1.pdf]

## *Supplementary Material*

# **Interleukin-17A Causes Osteoarthritis-Like Transcriptional Changes in Human Osteoarthritis-Derived Chondrocytes and Synovial Fibroblasts *In Vitro***

*Jolet Y. Mimpfen, Mathew J. Baldwin, Adam P. Cribbs, Martin Philpott, Andrew J. Carr, Stephanie G. Dakin, and Sarah J.B. Snelling*

## **1 Supplementary Methods**

### **1.1 Cell culture for p38 and NF- $\kappa$ B inhibitor treatment (regarding Supplementary Figures 8 and 9)**

Chondrocytes and synovial fibroblasts were cultured and plated out in 96-well plates as described earlier. On the day of the experiment, cells were pre-treated for 2 hours with JSH-23, SB204580, or vehicle control (Table 4-4) before the addition of 10 ng/mL concentration of IL-17A for 24 hours. SB203580 inhibits p38 signalling by suppressing the activation of MAPKAP kinase-2 and inhibiting the phosphorylation of heat shock protein 27. JSH-23 inhibits NF- $\kappa$ B signalling by interfering with the nuclear localisation signals of p65. After 24 hours, cells were washed with PBS before being harvested in cells-to-cDNA Cell Lysis Buffer (Ambion Inc, Foster City, CA, USA), and transferred to a PCR plate for cells-to-cDNA synthesis. cDNA was prepared using a cells-to-cDNA kit following the manufacturer's instructions (Ambion).

## 2 Supplementary Figures

**Cartilage**

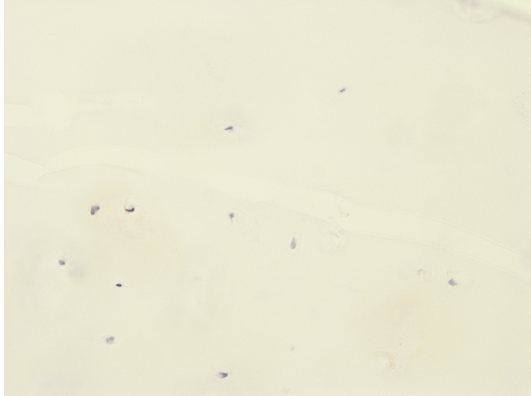

**Synovium**

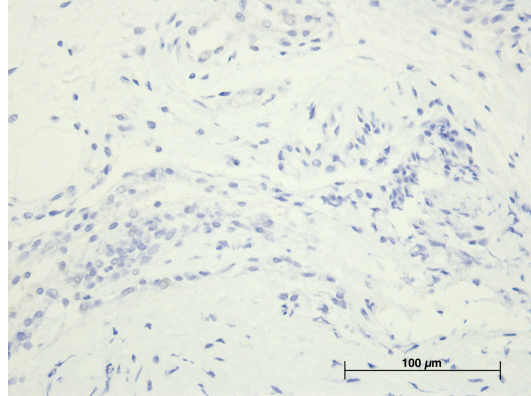

**Supplementary Figure 1.** Immunohistochemistry DAB staining with universal mouse negative control on cartilage or synovium. Antibodies were visualised with DAB (brown) and counterstained with haematoxylin (blue). Images were taken at 40x magnification

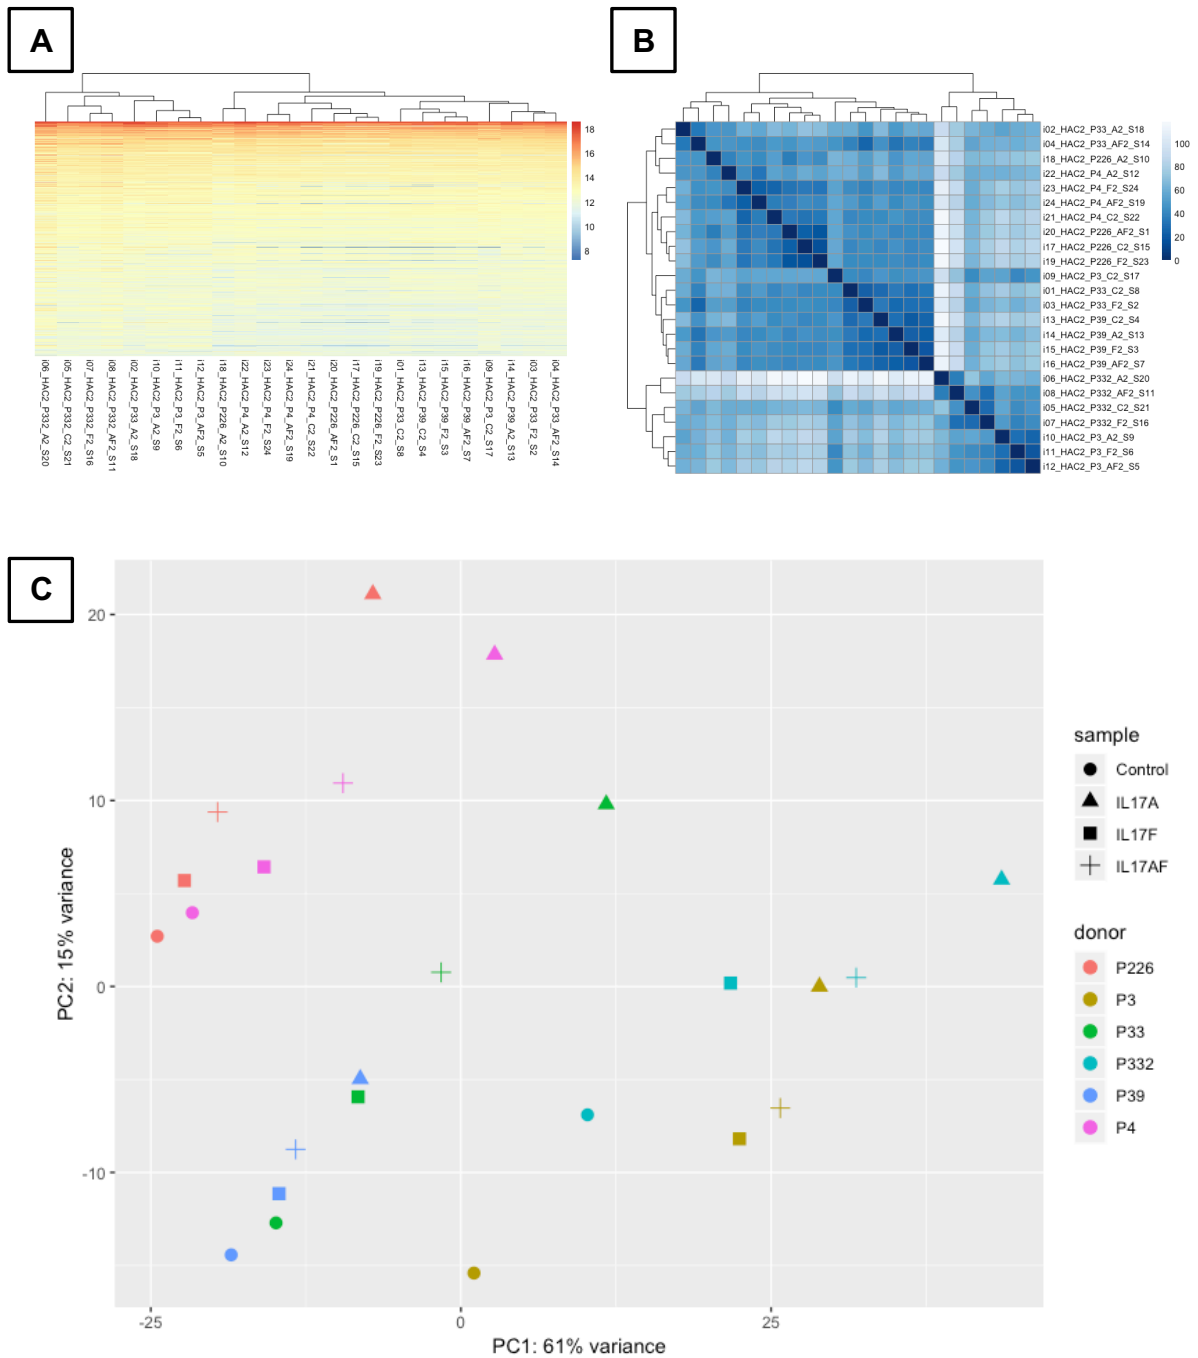

**Supplementary Figure 2.** Overview of different plots showing clustering of the chondrocytes. (A) Heatmap of the counts matrix for chondrocytes samples, blue shows low counts while red shows high counts. (B) Heatmap of the sample-to-sample distances, dark blue represents no to little difference while white represents large differences between samples. (C) Principle component analysis (PCA) plot for chondrocytes samples. Different sample types are represented with different shapes (circle = control, triangle = IL-17A, square = IL-17F, plus sign = IL-17AF) and different donors are represented with different colours (P226 = red, P3 = mustard, P33 = green, P332 = turquoise, P39 = blue, P4 = pink)

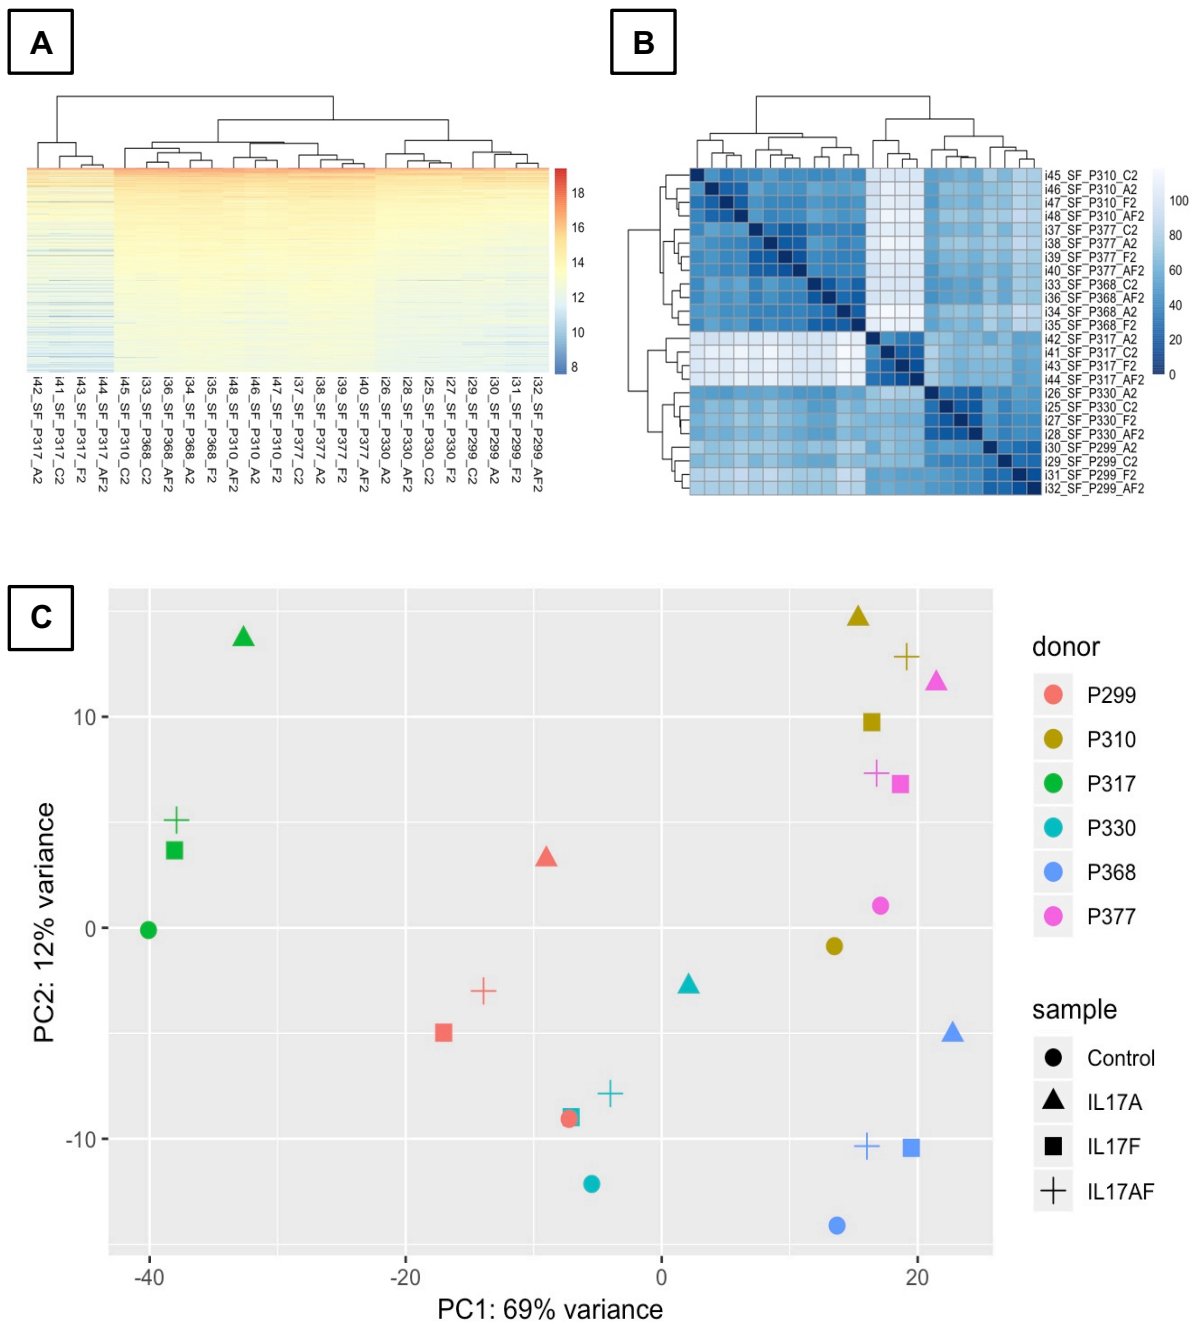

**Supplementary Figure 3.** Overview of different plots showing clustering of the synovial fibroblasts. (A) Heatmap of the counts matrix, blue shows low counts while red shows high counts. (B) Heatmap of the sample-to-sample distances, dark blue represents no to little difference while white represents large differences between samples. (C) Principle component analysis (PCA) plot for synovial fibroblast. Different sample types are represented with different shapes (circle = control, triangle = IL-17A, square = IL-17F, plus sign = IL-17AF) and different donors are represented with different colours (P299 = red, P310 = mustard, P317 = green, P330 = turquoise, P368 = blue, P377 = pink)

**Supplementary Figure 4.** Representative blots for the activation of p65 NF- $\kappa$ B, p38 MAP kinase, and ERK1/2 (p44/p42 MAP kinases) in chondrocytes and synovial fibroblasts by IL-17A, IL-17AF, and IL-17F (all 10 ng/ml) after 10 minutes, 30 minutes, 60 minutes, and 480 minutes (8 hours) of stimulation as can be seen in Figure 5 and Supplementary Figure 7. Blots were stained using vinculin (reference protein), and phosphorylated p38 or phosphorylated p65 NF- $\kappa$ B or phosphorylated ERK1/2, and total p38 or total p65 NF- $\kappa$ B or total ERK1/2, and blots were visualised with an enhanced chemiluminescent reagent.

(A) Protein lysate from end-stage chondrocytes stained for vinculin, phosphorylated p38, and total p38.

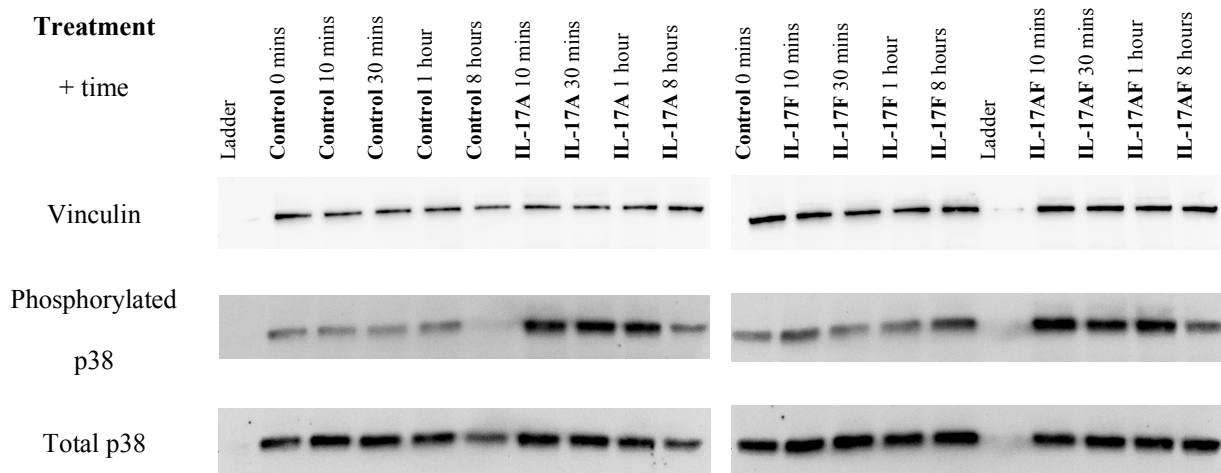

(B) Protein lysate from end-stage chondrocytes stained for vinculin, phosphorylated p65 NF- $\kappa$ B, and total p65 NF- $\kappa$ B.

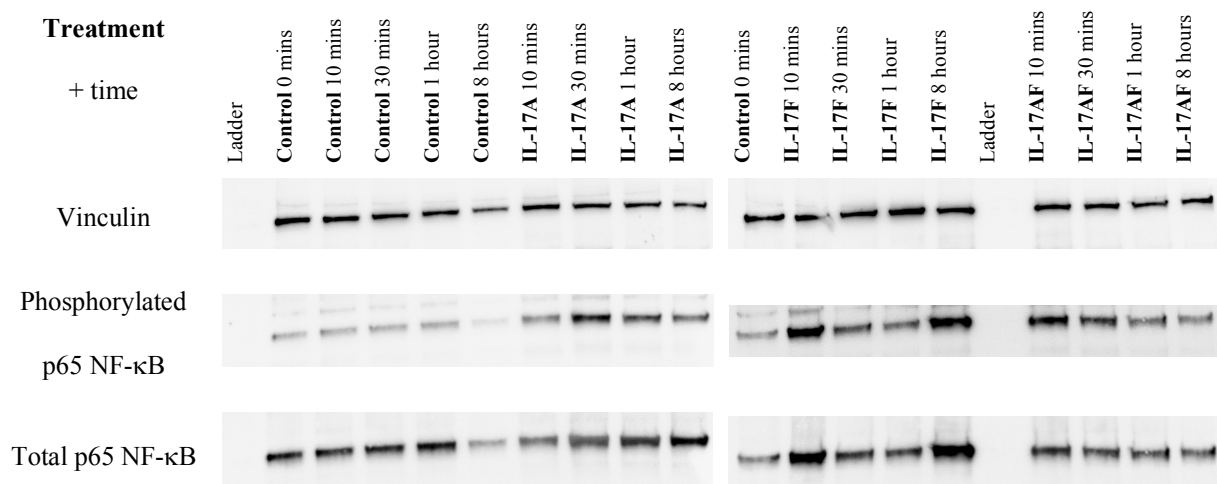

(C) Protein lysate from end-stage chondrocytes stained for vinculin, phosphorylated ERK1/2, and total ERK1/2.

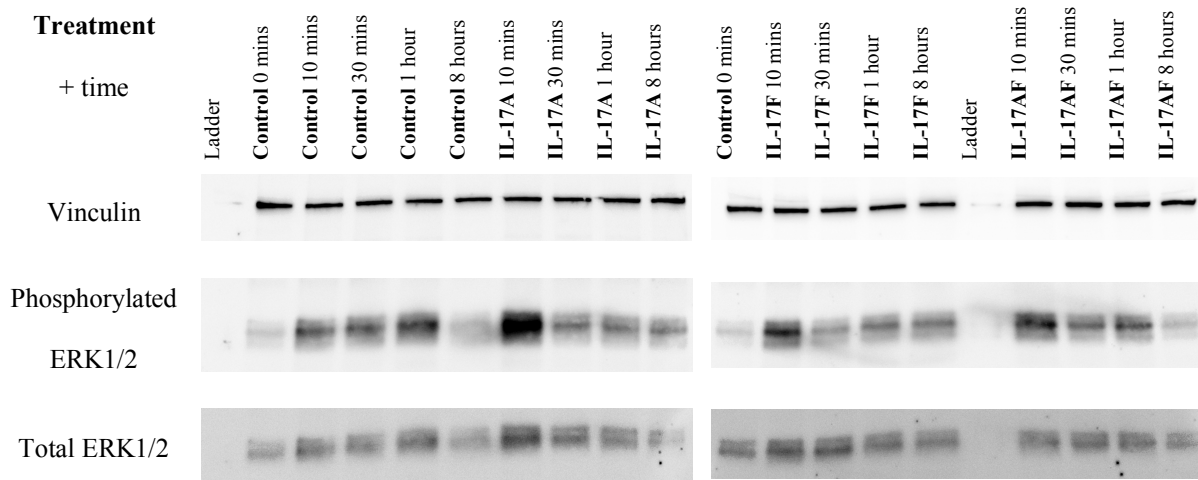

(D) Protein lysate from end-stage synovial fibroblasts stained for vinculin, phosphorylated p38, and total p38.

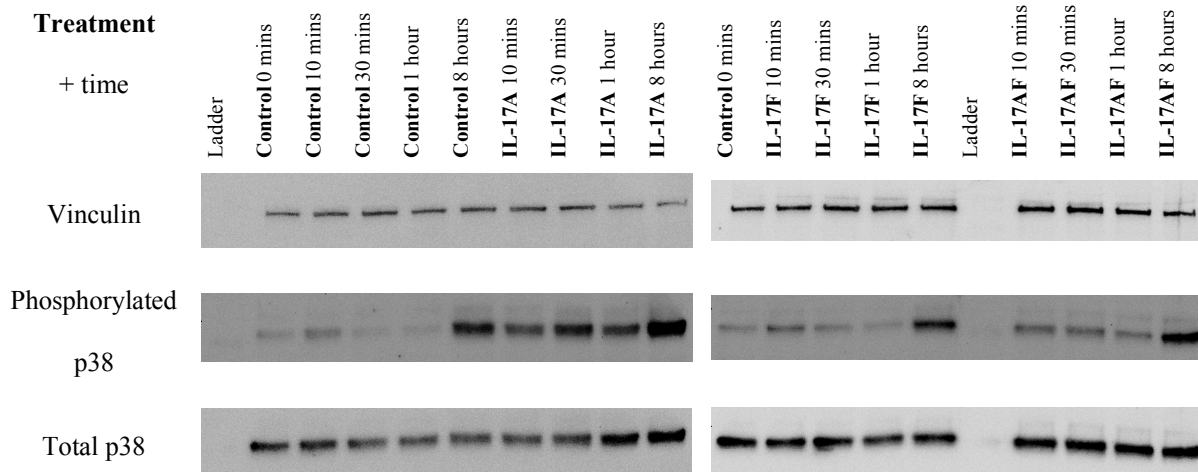

(E) Protein lysate from end-stage synovial fibroblasts treated with control or IL-17A stained for vinculin, phosphorylated p65 NF- $\kappa$ B, and total p65 NF- $\kappa$ B.

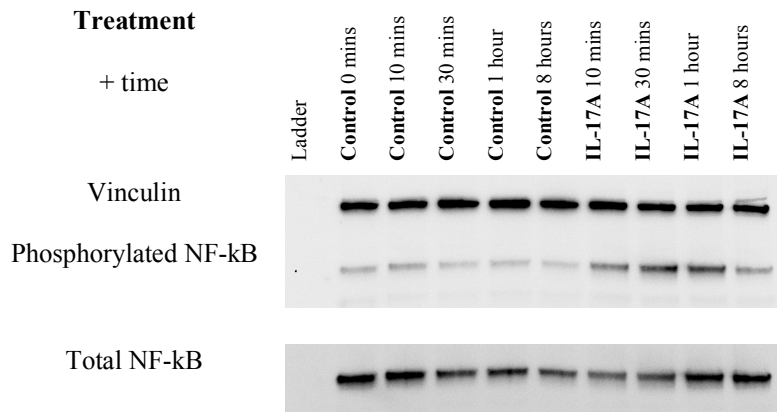

(F) Protein lysate from end-stage synovial fibroblasts treated with IL-17F and IL-17AF stained for vinculin, phosphorylated p65 NF- $\kappa$ B, and total p65 NF- $\kappa$ B.

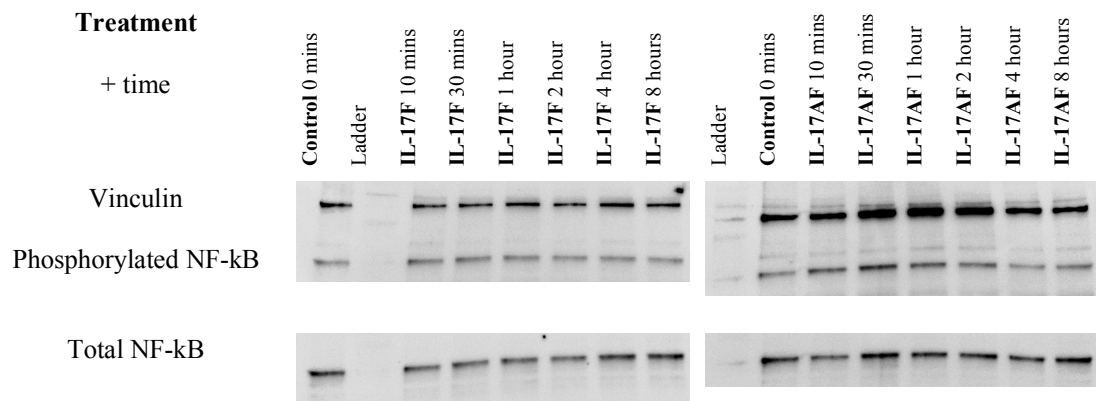

(G) Protein lysate from end-stage synovial fibroblasts stained for vinculin, phosphorylated ERK1/2, and total ERK1/2.

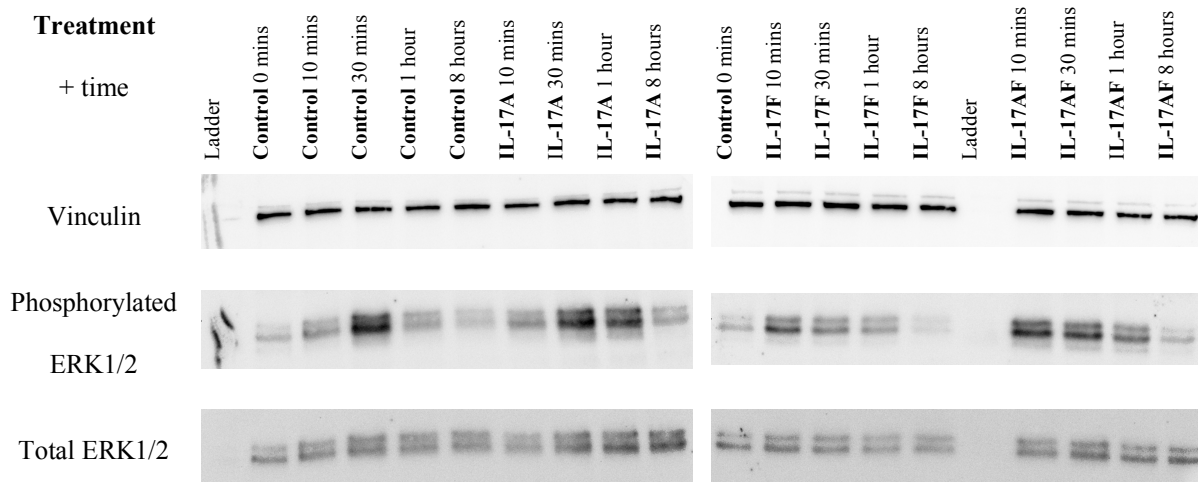



## Chondrocytes

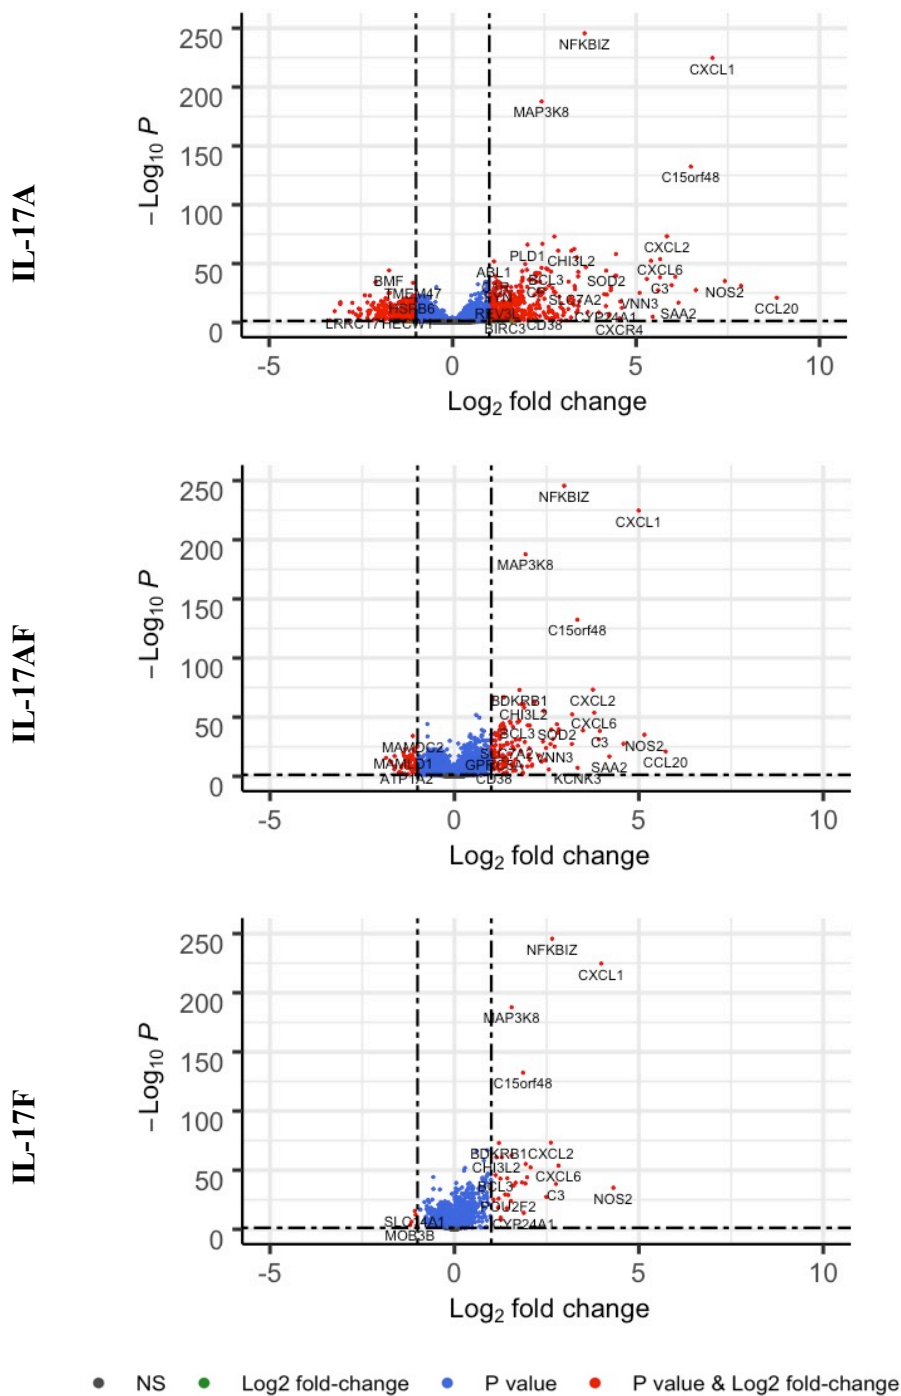

**Supplementary Figure 5.** Volcano plots showing the changes in gene expression in chondrocytes after treatment with IL-17A, IL-17AF, or IL-17F. Grey = not significant (NS); green = Log2 fold change of at least 1 or -1, but  $p > 0.05$ ; blue =  $p$ -value  $< 0.05$ , but log2 fold change  $> -1$  and  $< 1$ ; red =  $p$ -value  $< 0.05$  and log2 fold change of at least -1 or +1.  $n = 6$

### Synovial fibroblasts

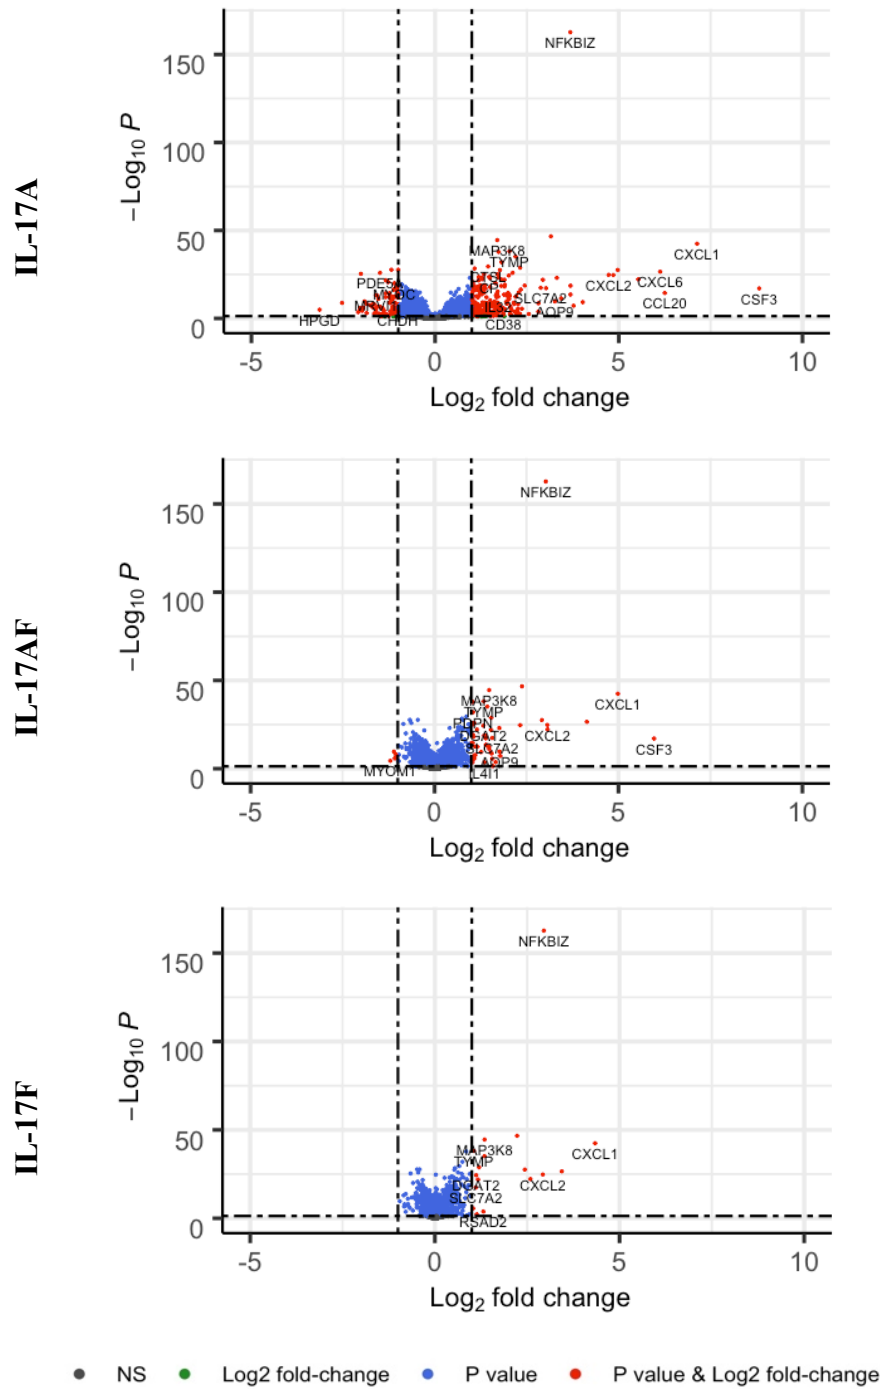

**Supplementary Figure 6.** Volcano plots showing the changes in gene expression in synovial fibroblasts after treatment with IL-17A, IL-17AF, or IL-17F. **Grey** = not significant (NS); **green** = Log2 fold change of at least 1 or -1, but  $p > 0.05$ ; **blue** =  $p$ -value  $< 0.05$ , but log2 fold change  $> -1$  and  $< 1$ ; **red** =  $p$ -value  $< 0.05$  and log2 fold change of at least -1 or +1.  $n = 6$

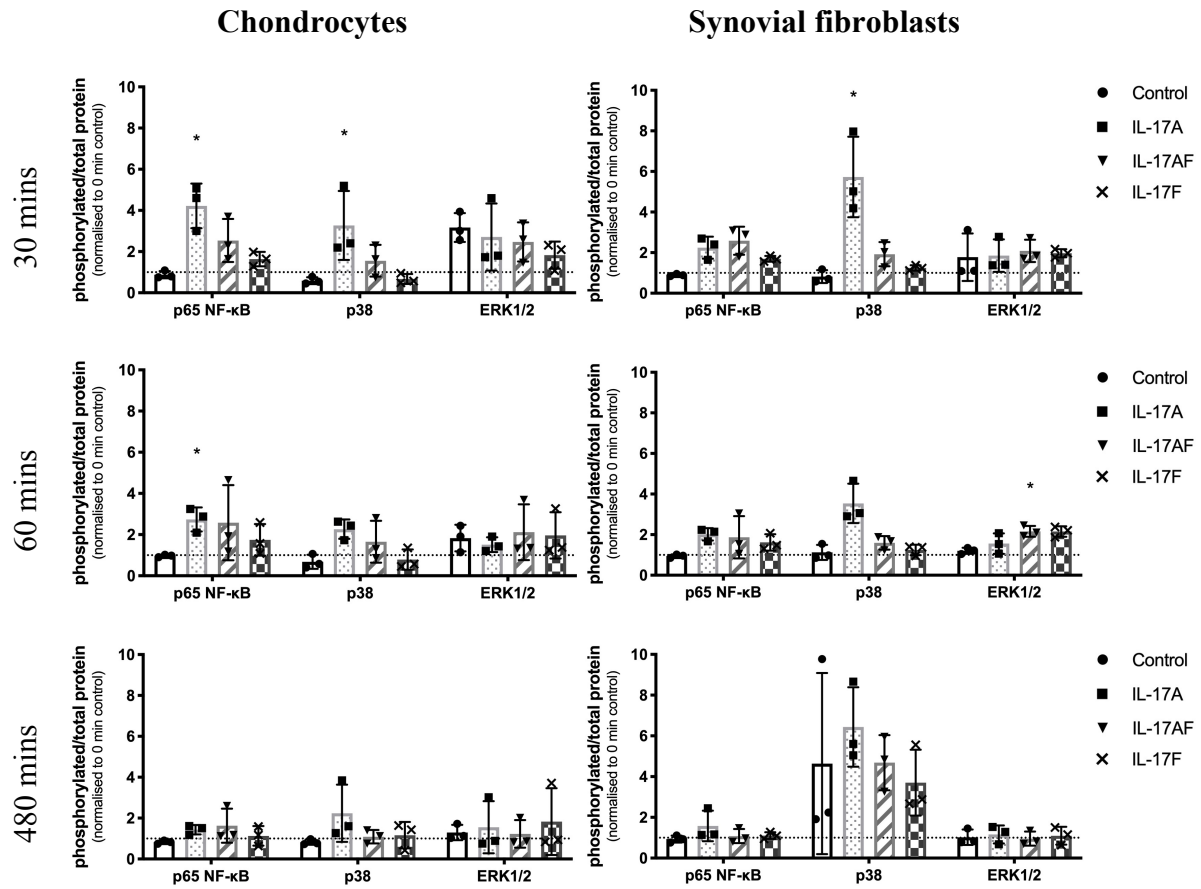

**Supplementary Figure 7.** Activation of p65 NF- $\kappa$ B, p38 MAP kinase, and ERK1/2 (p44/p42 MAP kinases) in chondrocytes and synovial fibroblasts by IL-17A, IL-17AF, and IL-17F (all 10 ng/ml) after 30 minutes, 60 minutes, and 480 minutes (8 hours) of stimulation. Relative ratio of phosphorylated protein over total protein compared to baseline control (0 mins). \* =  $p < 0.05$ , \*\* =  $p < 0.01$ , \*\*\* =  $p < 0.001$ , \*\*\*\* =  $p < 0.0001$ . Friedman test for each intracellular protein with Dunn's multiple comparisons test. Mean $\pm$ SD. N=3

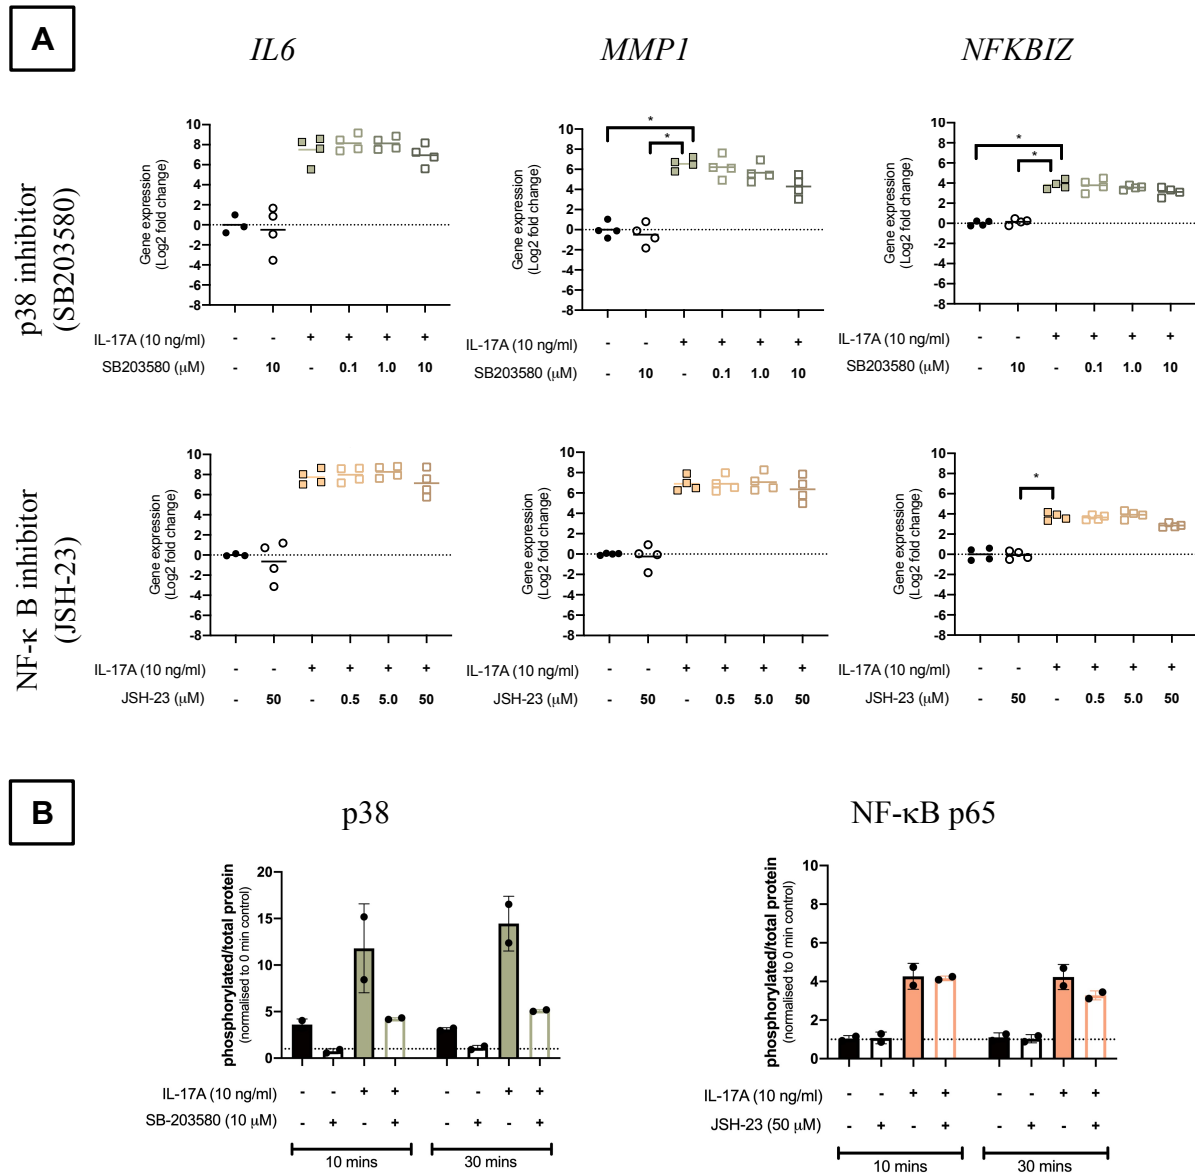

**Supplementary Figure 8.** Chondrocytes were pre-treated for 2 hours with SB203580 (**green**) (Sigma) at 0.1, 1.0, and 10 μM, JSH-23 (**orange**) (Sigma) at 0.5, 5.0, and 50 μM, or vehicle control before the addition of vehicle control or 10 ng/mL IL-17A for 24 hours. (A) mRNA expression of *IL6*, *MMP1*, and *NFKBIZ*. Gene expression was calculated using the ddCT-method using both *GAPDH* and *ACTB* as housekeepers. Gene expression is expressed as log<sub>2</sub> fold change compared to control. Changes in gene expression were calculated comparing each treatment to IL-17A treatment alone. Kruskal-Wallis test with Dunn's multiple comparisons test (*IL6*). Friedman test with Dunn's multiple comparisons test (*CXCL1* and *MMP1*). Individual values and mean. N=4. (B) Activation of p38 or NF-κB p65 after 10 and 30 minutes after the start of IL-17A treatment. Relative ratio of phosphorylated protein over total protein compared to baseline control (0 mins). Mean±SD. N=2. \* = p<0.05, \*\* = p<0.01, \*\*\* = p<0.001

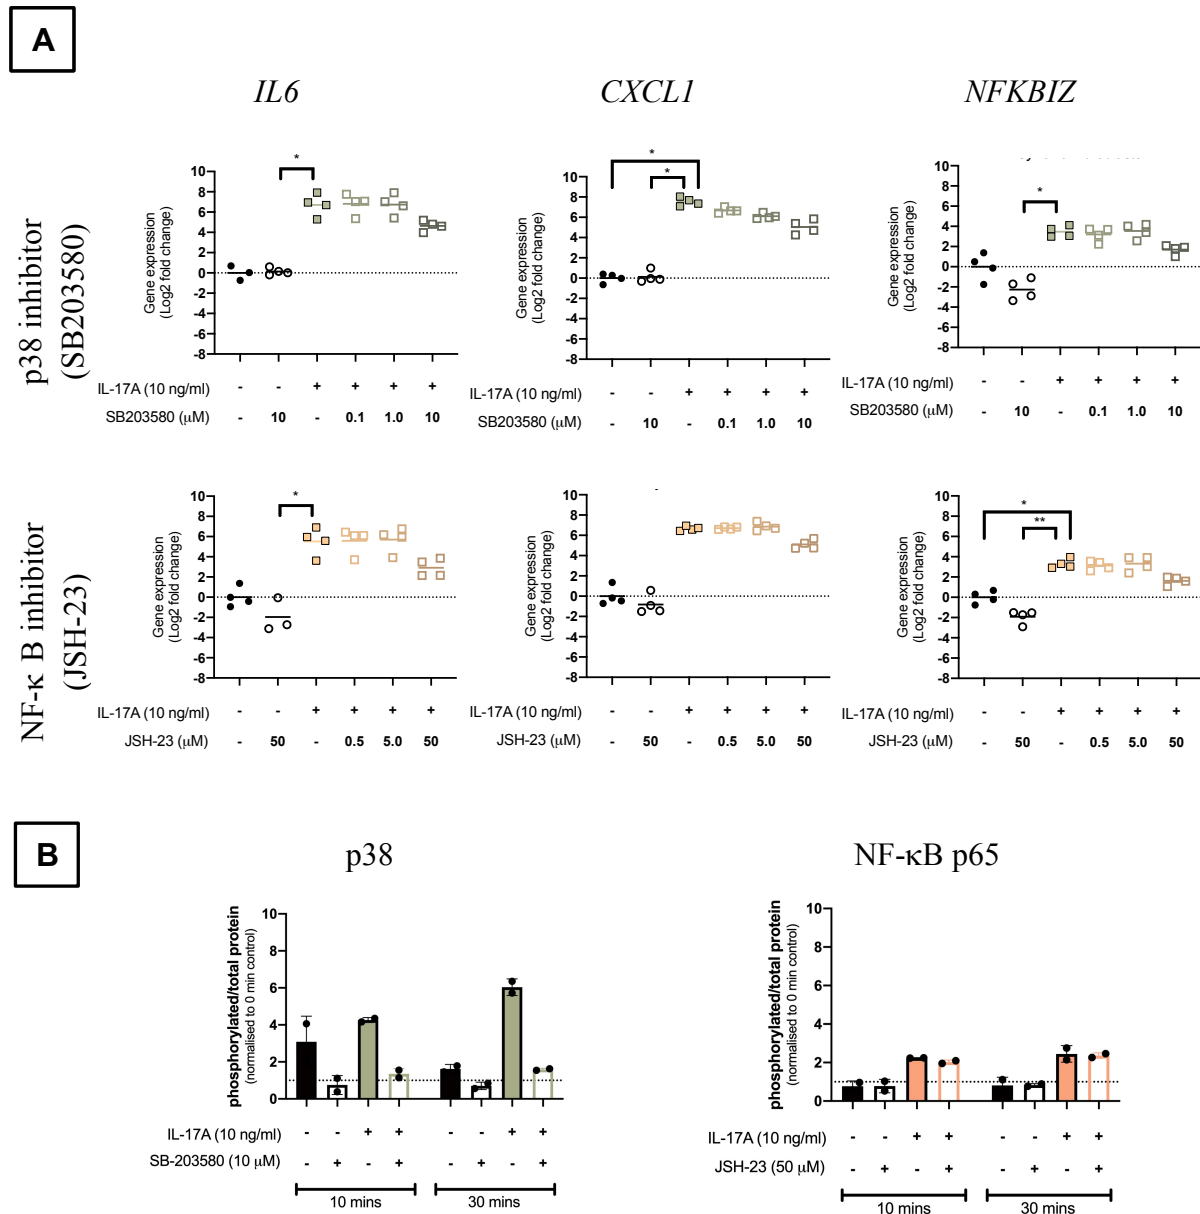

**Supplementary Figure 9.** Synovial fibroblasts were pre-treated for 2 hours with SB203580 (**green**) (Sigma) at 0.1, 1.0, and 10  $\mu$ M, JSH-23 (**orange**) (Sigma) at 0.5, 5.0, and 50  $\mu$ M, or vehicle control before the addition of vehicle control or 10 ng/mL IL-17A for 24 hours. (A) mRNA expression of *IL6*, *CXCL1*, and *NFKBIZ*. Gene expression was calculated using the ddCT-method using both *GAPDH* and *ACTB* as housekeepers. Gene expression is expressed as log<sub>2</sub> fold change compared to control. Changes in gene expression were calculated comparing each treatment to IL-17A treatment alone. Kruskal-Wallis test with Dunn's multiple comparisons test (*IL6*). Friedman test with Dunn's multiple comparisons test (*CXCL1* and *NFKBIZ*). Individual values and mean. N=4. (B) Activation of p38 or NF- $\kappa$ B p65 after 10 and 30 minutes after the start of IL-17A treatment. Relative ratio of phosphorylated protein over total protein compared to baseline control (0 mins). Mean $\pm$ SD. N=2. \* = p<0.05, \*\* = p<0.01, \*\*\* = p<0.001.

### 3 Supplementary Tables

**Supplementary Table 1.** Primary antibodies used for histology, including the target, isotype, supplier, reference number, and dilution at which each antibody was used.

| Target                              | Isotype                                                   | Supplier                     | Ref number | Dilution        |
|-------------------------------------|-----------------------------------------------------------|------------------------------|------------|-----------------|
| Human IL-17RA                       | Monoclonal mouse<br>IgG2B                                 | R&D Systems,<br>Abingdon, UK | MAB1771    | 1:300           |
| Human IL-17RC                       | Monoclonal mouse<br>IgG2B                                 | R&D Systems                  | MAB22691   | 1:2000          |
| Universal negative<br>control mouse | Cocktail of mouse IgG1,<br>IgG2a, IgG2b, IgG3, and<br>IgM | Dako, Glostrup,<br>Denmark   | IR750      | Ready to<br>use |

**Supplementary Table 2.** Primary and secondary antibodies used for western blot experiments, including target, supplier, reference number, and the dilution at which each antibody was used.

| Target                          | Supplier                                           | Ref number | Dilution                                                     |
|---------------------------------|----------------------------------------------------|------------|--------------------------------------------------------------|
| Vinculin<br>(reference protein) | Cell Signalling<br>Technology, Danvers,<br>MA, USA | 13901      | 1:1000                                                       |
| phospho-ERK1/2                  | Cell Signalling<br>Technology                      | 4370       | 1:2000                                                       |
| ERK1/2                          | Cell Signalling<br>Technology                      | 4695       | 1:1000                                                       |
| phospho-p65 NF- $\kappa$ B      | Cell Signalling<br>Technology                      | 3033       | 1:1000                                                       |
| p65 NF- $\kappa$ B              | Cell Signalling<br>Technology                      | 8242       | 1:1000                                                       |
| phospho-p38                     | Cell Signalling<br>Technology                      | 4511       | 1:1000                                                       |
| p38                             | Cell Signalling<br>Technology                      | 8690       | 1:1000                                                       |
| Anti-rabbit IgG, HRP-linked     | Cell Signalling<br>Technology                      | 7074       | 1:1000 (phospho-<br>antibodies)<br>1:2000 (total-antibodies) |

**Supplementary Table 3.** Overview of primers, including the source of the primers, and the forward and reverse primer sequences where available.

| Target        | Supplier          | Forward                      | Reverse                     |
|---------------|-------------------|------------------------------|-----------------------------|
| <i>ACTB</i>   | Designed in-house | CCTGGCACCCAGCACA<br>AT       | GCCGATCCACACGGAGTA<br>CT    |
| <i>CXCL1</i>  | Designed in-house | GGCGGAAAGCTTGCCT<br>CAATCCTG | GCCTCCTTCAGGAACAGCC<br>ACCA |
| <i>GAPDH</i>  | Designed in-house | GAAGGTTGAAGGTCGG<br>AGTC     | GAAGATGGTGATGGGATTT<br>C    |
| <i>IL17RA</i> | Primerdesign Ltd  | TGAGCACATGCACCAC<br>ATAC     | TTAAGGTTGCGTAGAGTGA<br>GTG  |
| <i>IL17RC</i> | Primerdesign Ltd  | AGTCGTGCTCTCCTTCC<br>AG      | AGATTCGTACCTTCACTCC<br>CTAG |
| <i>IL6</i>    | Primerdesign Ltd  | GCAGAAAACAACCTGA<br>ACCTT    | ACCTCAAACCTCCAAAAGA<br>CCA  |
| <i>MMP1</i>   | Primerdesign Ltd  | GCACTGAGAAAGAAGA<br>CAAAGG   | CTAAGTCCACATCTTGCTC<br>TTG  |
| <i>NFKBIZ</i> | Qiagen            | <i>Proprietary sequence</i>  | <i>Proprietary sequence</i> |
| <i>PDPN</i>   | Primerdesign Ltd  | CCGAAGATGATGTGGT<br>GACTC    | CGATGCGAATGCCTGTTAC<br>A    |

**Supplementary Table 4.** Overview of differentially expressed genes in chondrocytes between vehicle control and IL-17 treatment (10 ng/ml) with an adjusted p-value of <0.05. Green boxes note logarithmic fold changes (LFC) of at least +1 and red boxes note LFC of at least -1, while blank boxes show an LFC -1 and 1. Genes are sorted alphabetically on SYMBOL gene name.

| Ensemble gene name | SYMBOL gene name | Adjusted p-value | Log2 Fold Change (LFC) |        |         |
|--------------------|------------------|------------------|------------------------|--------|---------|
|                    |                  |                  | IL-17A                 | IL-17F | IL-17AF |
| ENSG00000183044    | <i>ABAT</i>      | 3.74E-11         | -1.073                 | -0.357 | -0.744  |
| ENSG00000165029    | <i>ABCA1</i>     | 2.28E-17         | 1.199                  | 0.187  | 0.450   |
| ENSG00000167972    | <i>ABCA3</i>     | 4.89E-10         | -1.475                 | -0.491 | -0.923  |
| ENSG00000005471    | <i>ABCB4</i>     | 7.13E-09         | -1.011                 | -0.364 | -0.989  |
| ENSG00000069431    | <i>ABCC9</i>     | 7.20E-05         | 1.850                  | 0.005  | 0.053   |
| ENSG00000143994    | <i>ABHD1</i>     | 5.23E-03         | -1.571                 | -0.026 | -0.177  |
| ENSG00000011198    | <i>ABHD5</i>     | 3.70E-11         | 1.051                  | 0.039  | 0.405   |
| ENSG00000097007    | <i>ABL1</i>      | 1.35E-52         | 1.128                  | 0.285  | 0.589   |
| ENSG00000240303    | <i>ACAD11</i>    | 3.42E-18         | -1.009                 | -0.309 | -0.566  |
| ENSG00000115361    | <i>ACADL</i>     | 1.18E-03         | -1.519                 | -0.026 | -0.234  |
| ENSG00000144476    | <i>ACKR3</i>     | 5.73E-31         | 2.033                  | 0.645  | 1.110   |
| ENSG00000129048    | <i>ACKR4</i>     | 9.29E-10         | -2.812                 | -0.022 | -1.313  |
| ENSG00000122729    | <i>ACO1</i>      | 7.38E-16         | 1.051                  | 0.201  | 0.425   |
| ENSG00000068366    | <i>ACSL4</i>     | 7.02E-18         | 1.712                  | 0.049  | 0.521   |
| ENSG00000107796    | <i>ACTA2</i>     | 4.53E-08         | -1.184                 | -0.328 | -0.727  |
| ENSG00000159251    | <i>ACTC1</i>     | 1.80E-17         | -2.156                 | -0.923 | -1.205  |
| ENSG00000148848    | <i>ADAM12</i>    | 5.00E-18         | 1.387                  | 0.269  | 0.642   |
| ENSG00000042980    | <i>ADAM28</i>    | 1.27E-14         | 3.424                  | 0.026  | 2.038   |
| ENSG00000138316    | <i>ADAMTS14</i>  | 2.34E-17         | -2.734                 | -0.926 | -1.281  |
| ENSG00000166106    | <i>ADAMTS15</i>  | 8.81E-09         | -1.549                 | -0.684 | -1.166  |
| ENSG00000049192    | <i>ADAMTS6</i>   | 4.16E-04         | 1.158                  | 0.015  | 0.109   |
| ENSG00000163638    | <i>ADAMTS9</i>   | 2.97E-05         | 1.616                  | 0.013  | 0.347   |
| ENSG00000173567    | <i>ADGRF3</i>    | 1.50E-02         | -1.032                 | -0.027 | -0.256  |
| ENSG00000198099    | <i>ADH4</i>      | 1.85E-02         | 1.357                  | 0.018  | 0.207   |
| ENSG00000196344    | <i>ADH7</i>      | 8.39E-04         | -1.117                 | -0.019 | -0.178  |
| ENSG00000128271    | <i>ADORA2A</i>   | 5.07E-03         | 1.074                  | 0.001  | 0.096   |
| ENSG00000150594    | <i>ADRA2A</i>    | 1.96E-09         | -2.284                 | -0.040 | -1.134  |
| ENSG00000111863    | <i>ADTRP</i>     | 1.73E-06         | 1.270                  | 0.052  | 0.545   |
| ENSG00000144218    | <i>AFF3</i>      | 8.87E-08         | -2.297                 | -0.025 | -0.980  |
| ENSG00000187546    | <i>AGMO</i>      | 1.97E-02         | -1.307                 | -0.022 | -0.183  |
| ENSG00000026652    | <i>AGPAT4</i>    | 1.57E-10         | 1.227                  | 0.047  | 0.421   |
| ENSG00000162433    | <i>AK4</i>       | 5.46E-09         | 1.092                  | 0.102  | 0.484   |



|                 |                 |          |        |        |        |
|-----------------|-----------------|----------|--------|--------|--------|
| ENSG00000154027 | <i>AK5</i>      | 2.21E-12 | -2.558 | -0.040 | -1.029 |
| ENSG00000131016 | <i>AKAP12</i>   | 1.66E-14 | -1.242 | -0.704 | -1.268 |
| ENSG00000151320 | <i>AKAP6</i>    | 4.58E-09 | -1.153 | -0.478 | -1.004 |
| ENSG00000227471 | <i>AKR1B15</i>  | 2.50E-03 | 1.352  | 0.027  | 0.852  |
| ENSG00000187134 | <i>AKR1C1</i>   | 3.14E-07 | 1.965  | 0.750  | 1.276  |
| ENSG00000151632 | <i>AKR1C2</i>   | 2.03E-07 | 1.269  | 0.644  | 1.006  |
| ENSG00000144908 | <i>ALDH1L1</i>  | 4.75E-02 | -1.196 | -0.019 | -0.063 |
| ENSG00000112294 | <i>ALDH5A1</i>  | 6.15E-08 | -1.341 | -0.070 | -0.821 |
| ENSG00000133805 | <i>AMPD3</i>    | 4.23E-12 | 1.453  | 0.045  | 0.424  |
| ENSG00000091879 | <i>ANGPT2</i>   | 3.13E-10 | -1.587 | -0.040 | -0.828 |
| ENSG00000136859 | <i>ANGPTL2</i>  | 7.50E-14 | 1.008  | 0.308  | 0.677  |
| ENSG00000167772 | <i>ANGPTL4</i>  | 3.14E-09 | 1.289  | 0.360  | 0.858  |
| ENSG00000165887 | <i>ANKRD2</i>   | 1.50E-02 | -1.636 | -0.019 | -0.122 |
| ENSG00000089847 | <i>ANKRD24</i>  | 1.18E-03 | -1.049 | -0.035 | -0.838 |
| ENSG00000138772 | <i>ANXA3</i>    | 5.96E-03 | -1.096 | 0.001  | -0.096 |
| ENSG00000138356 | <i>AOX1</i>     | 2.39E-09 | 1.343  | 0.033  | 0.397  |
| ENSG00000154856 | <i>APCDD1</i>   | 3.94E-09 | 1.367  | 0.395  | 0.864  |
| ENSG00000171388 | <i>APLN</i>     | 3.82E-06 | 2.090  | 0.003  | 0.113  |
| ENSG00000084674 | <i>APOB</i>     | 2.51E-02 | -1.071 | -0.015 | -0.210 |
| ENSG00000128284 | <i>APOL3</i>    | 4.77E-13 | 1.100  | 0.283  | 0.565  |
| ENSG00000136044 | <i>APPL2</i>    | 3.06E-23 | -1.084 | -0.345 | -0.595 |
| ENSG00000165272 | <i>AQP3</i>     | 1.33E-14 | -1.623 | -0.083 | -0.400 |
| ENSG00000165269 | <i>AQP7</i>     | 2.07E-10 | -2.289 | -0.602 | -1.063 |
| ENSG00000103569 | <i>AQP9</i>     | 1.60E-02 | 3.101  | 0.005  | 0.045  |
| ENSG00000169083 | <i>AR</i>       | 1.38E-12 | -1.150 | -0.415 | -0.719 |
| ENSG00000146376 | <i>ARHGAP18</i> | 2.83E-05 | -1.089 | -0.038 | -0.614 |
| ENSG00000137727 | <i>ARHGAP20</i> | 1.77E-08 | -1.442 | -0.053 | -0.853 |
| ENSG00000111348 | <i>ARHGDIB</i>  | 7.34E-06 | -1.345 | -0.482 | -0.334 |
| ENSG00000183111 | <i>ARHGEF37</i> | 1.34E-07 | -1.136 | -0.283 | -0.733 |
| ENSG00000116017 | <i>ARID3A</i>   | 1.49E-19 | 1.072  | 0.129  | 0.485  |
| ENSG00000169126 | <i>ARMC4</i>    | 2.72E-03 | -1.309 | -0.027 | -0.391 |
| ENSG00000113369 | <i>ARRDC3</i>   | 4.44E-16 | 1.691  | 0.060  | 0.606  |
| ENSG00000099889 | <i>ARVCF</i>    | 4.56E-11 | -1.192 | -0.077 | -0.524 |
| ENSG00000110881 | <i>ASIC1</i>    | 1.21E-06 | -1.006 | -0.072 | -0.563 |
| ENSG00000108381 | <i>ASPA</i>     | 7.01E-03 | -1.037 | -0.027 | -0.359 |
| ENSG00000106819 | <i>ASPN</i>     | 1.12E-15 | -1.910 | -0.606 | -1.141 |
| ENSG00000130707 | <i>ASS1</i>     | 1.20E-23 | 1.190  | 0.346  | 0.735  |
| ENSG00000148219 | <i>ASTN2</i>    | 8.34E-04 | -1.119 | -0.028 | -0.440 |
| ENSG00000162772 | <i>ATF3</i>     | 1.50E-08 | 1.265  | 0.101  | 1.044  |
| ENSG00000018625 | <i>ATP1A2</i>   | 2.36E-08 | -2.275 | -0.755 | -1.289 |

|                 |                 |           |        |        |        |
|-----------------|-----------------|-----------|--------|--------|--------|
| ENSG00000070961 | <i>ATP2B1</i>   | 7.01E-08  | 1.003  | 0.076  | 0.355  |
| ENSG00000132932 | <i>ATP8A2</i>   | 1.27E-02  | -0.792 | -0.019 | -1.255 |
| ENSG00000104043 | <i>ATP8B4</i>   | 9.96E-05  | 1.323  | 0.023  | 0.374  |
| ENSG00000107518 | <i>ATRNL1</i>   | 9.38E-08  | -1.002 | -0.285 | -0.624 |
| ENSG00000119986 | <i>AVP11</i>    | 9.65E-19  | 1.141  | 0.359  | 0.722  |
| ENSG00000162630 | <i>B3GALT2</i>  | 2.98E-10  | -3.217 | -0.011 | -0.179 |
| ENSG00000086062 | <i>B4GALT1</i>  | 1.19E-15  | 1.001  | 0.105  | 0.436  |
| ENSG00000164929 | <i>BAALC</i>    | 4.05E-04  | -1.115 | -0.011 | -0.211 |
| ENSG00000095739 | <i>BAMBI</i>    | 6.21E-10  | -1.034 | -0.039 | -0.270 |
| ENSG00000176788 | <i>BASP1</i>    | 1.07E-13  | 1.150  | 0.431  | 0.836  |
| ENSG00000156127 | <i>BATF</i>     | 4.55E-04  | 1.203  | 0.003  | 0.105  |
| ENSG00000140379 | <i>BCL2A1</i>   | 3.52E-03  | 2.286  | 0.001  | 0.042  |
| ENSG00000069399 | <i>BCL3</i>     | 1.74E-46  | 2.557  | 1.118  | 1.713  |
| ENSG00000113916 | <i>BCL6</i>     | 9.25E-15  | 1.181  | 0.252  | 0.600  |
| ENSG00000100739 | <i>BDKRB1</i>   | 9.95E-74  | 2.772  | 1.207  | 1.764  |
| ENSG00000168398 | <i>BDKRB2</i>   | 5.42E-23  | 1.883  | 0.723  | 1.086  |
| ENSG00000176697 | <i>BDNF</i>     | 1.35E-04  | 1.121  | 0.016  | 0.198  |
| ENSG00000167995 | <i>BEST1</i>    | 7.21E-31  | 1.871  | 0.425  | 0.971  |
| ENSG00000134107 | <i>BHLHE40</i>  | 2.26E-08  | 1.342  | 0.067  | 0.742  |
| ENSG00000123095 | <i>BHLHE41</i>  | 7.70E-24  | 1.313  | 0.123  | 0.421  |
| ENSG00000015475 | <i>BID</i>      | 3.25E-24  | 1.017  | 0.288  | 0.452  |
| ENSG00000023445 | <i>BIRC3</i>    | 7.20E-05  | 1.436  | 0.007  | 0.072  |
| ENSG00000104081 | <i>BMF</i>      | 6.54E-45  | -1.733 | -0.574 | -0.733 |
| ENSG00000125845 | <i>BMP2</i>     | 4.94E-03  | 1.038  | 0.010  | 0.185  |
| ENSG00000153162 | <i>BMP6</i>     | 6.62E-13  | 2.375  | 0.031  | 1.093  |
| ENSG00000078725 | <i>BRINP1</i>   | 6.40E-05  | 1.137  | 0.023  | 0.207  |
| ENSG00000133639 | <i>BTG1</i>     | 1.53E-15  | 1.059  | 0.386  | 0.651  |
| ENSG00000154493 | <i>C10orf90</i> | 6.09E-14  | 1.446  | 0.791  | 1.073  |
| ENSG00000120055 | <i>C10orf95</i> | 1.61E-02  | -1.150 | -0.016 | -0.148 |
| ENSG00000110665 | <i>C11orf21</i> | 1.46E-02  | -1.137 | -0.004 | -0.130 |
| ENSG00000174370 | <i>C11orf45</i> | 4.37E-07  | -2.072 | -1.161 | -1.111 |
| ENSG00000149300 | <i>C11orf52</i> | 3.30E-05  | -1.092 | -0.380 | -0.853 |
| ENSG00000187479 | <i>C11orf96</i> | 1.00E-21  | 3.216  | 0.948  | 1.801  |
| ENSG00000235162 | <i>C12orf75</i> | 1.06E-23  | -1.036 | -0.370 | -0.537 |
| ENSG00000166920 | <i>C15orf48</i> | 4.24E-133 | 6.492  | 1.860  | 3.333  |
| ENSG00000132016 | <i>C19orf57</i> | 1.87E-03  | -1.231 | -0.032 | -0.123 |
| ENSG00000106392 | <i>C1GALT1</i>  | 4.18E-37  | 1.908  | 0.703  | 1.091  |
| ENSG00000173918 | <i>C1QTNF1</i>  | 6.70E-21  | 1.844  | 0.027  | 0.602  |
| ENSG00000145861 | <i>C1QTNF2</i>  | 6.45E-10  | -1.790 | -0.048 | -0.804 |
| ENSG00000163145 | <i>C1QTNF7</i>  | 4.42E-10  | -2.307 | -0.748 | -1.415 |

|                 |                 |          |        |        |        |
|-----------------|-----------------|----------|--------|--------|--------|
| ENSG00000205863 | <i>CIQTNF9B</i> | 8.86E-03 | -1.211 | -0.020 | -0.088 |
| ENSG00000159403 | <i>CIR</i>      | 6.20E-40 | 1.174  | 0.413  | 0.742  |
| ENSG00000139178 | <i>CIRL</i>     | 7.07E-35 | 1.241  | 0.455  | 0.750  |
| ENSG00000198535 | <i>C2CD4A</i>   | 1.97E-06 | 4.262  | 0.015  | 2.558  |
| ENSG00000205502 | <i>C2CD4B</i>   | 1.51E-05 | 5.453  | 0.009  | 0.089  |
| ENSG00000125730 | <i>C3</i>       | 4.39E-39 | 5.653  | 2.751  | 3.940  |
| ENSG00000197405 | <i>C5AR1</i>    | 5.40E-05 | 1.264  | 0.016  | 0.141  |
| ENSG00000178776 | <i>C5orf46</i>  | 4.35E-02 | 1.714  | 0.007  | 0.056  |
| ENSG00000074410 | <i>CA12</i>     | 3.53E-35 | 2.385  | 0.658  | 1.177  |
| ENSG00000107159 | <i>CA9</i>      | 3.95E-04 | 1.660  | 0.024  | 0.215  |
| ENSG00000183346 | <i>CABCOCO1</i> | 3.51E-08 | -1.205 | -0.119 | -0.604 |
| ENSG00000070808 | <i>CAMK2A</i>   | 1.08E-05 | -1.522 | -0.052 | -1.159 |
| ENSG00000058404 | <i>CAMK2B</i>   | 4.19E-04 | -2.109 | -0.023 | -0.775 |
| ENSG00000105519 | <i>CAPS</i>     | 9.33E-10 | -1.012 | -0.134 | -0.419 |
| ENSG00000204682 | <i>CASC10</i>   | 4.69E-08 | -1.645 | -0.044 | -1.292 |
| ENSG00000168497 | <i>CAVIN2</i>   | 5.99E-14 | -2.012 | -0.077 | -1.198 |
| ENSG00000150636 | <i>CCDC102B</i> | 1.60E-03 | -1.307 | -0.018 | -0.121 |
| ENSG00000168491 | <i>CCDC110</i>  | 1.67E-07 | -1.046 | -0.402 | -0.800 |
| ENSG00000198003 | <i>CCDC151</i>  | 2.12E-02 | -1.032 | -0.024 | -0.216 |
| ENSG00000166510 | <i>CCDC68</i>   | 1.39E-02 | 1.033  | 0.021  | 0.115  |
| ENSG00000055813 | <i>CCDC85A</i>  | 3.05E-12 | -1.225 | -0.043 | -0.536 |
| ENSG00000181374 | <i>CCL13</i>    | 4.54E-02 | 1.739  | 0.001  | 0.035  |
| ENSG00000108691 | <i>CCL2</i>     | 1.17E-24 | 4.129  | 1.530  | 2.484  |
| ENSG00000115009 | <i>CCL20</i>    | 1.03E-21 | 8.836  | 0.022  | 5.726  |
| ENSG00000213927 | <i>CCL27</i>    | 1.11E-02 | -1.397 | -0.011 | -0.136 |
| ENSG00000108688 | <i>CCL7</i>     | 3.78E-13 | 4.614  | 0.022  | 2.363  |
| ENSG00000108700 | <i>CCL8</i>     | 4.55E-28 | 5.598  | 0.010  | 2.603  |
| ENSG00000135083 | <i>CCNJL</i>    | 1.29E-02 | -1.102 | -0.031 | -0.175 |
| ENSG00000163823 | <i>CCR1</i>     | 1.52E-02 | 1.585  | 0.005  | 0.088  |
| ENSG00000126353 | <i>CCR7</i>     | 1.31E-15 | 2.201  | 0.785  | 0.912  |
| ENSG00000158473 | <i>CD1D</i>     | 4.79E-19 | 3.168  | 1.179  | 2.009  |
| ENSG00000174807 | <i>CD248</i>    | 3.03E-02 | -1.244 | -0.008 | -0.109 |
| ENSG00000004468 | <i>CD38</i>     | 7.16E-08 | 2.508  | 0.009  | 1.078  |
| ENSG00000085117 | <i>CD82</i>     | 1.69E-15 | 1.081  | 0.156  | 0.464  |
| ENSG00000074276 | <i>CDHR2</i>    | 4.85E-02 | -1.122 | -0.020 | -0.076 |
| ENSG00000138395 | <i>CDK15</i>    | 1.80E-02 | -2.317 | -0.011 | -0.071 |
| ENSG00000138769 | <i>CDKL2</i>    | 2.99E-03 | -1.391 | -0.023 | -0.617 |
| ENSG00000129596 | <i>CDO1</i>     | 3.01E-11 | 1.199  | 0.416  | 0.669  |
| ENSG00000172216 | <i>CEBPB</i>    | 2.40E-32 | 1.838  | 0.761  | 1.227  |
| ENSG00000221869 | <i>CEBPD</i>    | 7.11E-44 | 2.682  | 1.434  | 1.985  |

|                 |                 |           |        |        |        |
|-----------------|-----------------|-----------|--------|--------|--------|
| ENSG00000184524 | <i>CEND1</i>    | 2.02E-03  | 1.365  | 0.017  | 0.690  |
| ENSG00000188452 | <i>CERKL</i>    | 1.47E-08  | -1.523 | -0.615 | -0.657 |
| ENSG00000105792 | <i>CFAP69</i>   | 1.68E-18  | 1.933  | 0.051  | 0.917  |
| ENSG00000243649 | <i>CFB</i>      | 1.31E-22  | 2.906  | 0.030  | 0.834  |
| ENSG00000128849 | <i>CGNL1</i>    | 2.59E-07  | 1.058  | 0.031  | 0.204  |
| ENSG00000138135 | <i>CH25H</i>    | 3.44E-26  | 2.801  | 0.030  | 1.085  |
| ENSG00000100399 | <i>CHADL</i>    | 5.07E-07  | -1.652 | -0.026 | -0.516 |
| ENSG00000016391 | <i>CHDH</i>     | 1.53E-15  | -1.299 | -0.283 | -0.471 |
| ENSG00000183765 | <i>CHEK2</i>    | 1.11E-10  | 1.379  | 0.479  | 0.809  |
| ENSG00000133048 | <i>CHI3L1</i>   | 2.71E-44  | 1.892  | 0.758  | 1.273  |
| ENSG00000064886 | <i>CHI3L2</i>   | 1.22E-61  | 3.236  | 1.137  | 1.880  |
| ENSG00000255112 | <i>CHMPIB</i>   | 4.05E-18  | 1.514  | 0.451  | 0.876  |
| ENSG00000128656 | <i>CHN1</i>     | 1.12E-12  | -1.419 | -0.039 | -0.429 |
| ENSG00000054938 | <i>CHRD12</i>   | 6.11E-05  | 1.706  | 0.011  | 0.192  |
| ENSG00000171310 | <i>CHST11</i>   | 2.96E-15  | 1.547  | 0.042  | 0.508  |
| ENSG00000163815 | <i>CLEC3B</i>   | 2.87E-05  | -1.061 | -0.063 | -0.451 |
| ENSG00000169583 | <i>CLIC3</i>    | 2.64E-07  | -1.020 | -0.330 | -0.436 |
| ENSG00000159212 | <i>CLIC6</i>    | 4.74E-21  | 1.064  | 0.157  | 0.546  |
| ENSG00000165959 | <i>CLMN</i>     | 2.29E-10  | 1.448  | 0.354  | 0.634  |
| ENSG00000149970 | <i>CNKSR2</i>   | 3.19E-04  | -1.114 | -0.029 | -0.288 |
| ENSG00000153721 | <i>CNKSR3</i>   | 1.78E-17  | -1.189 | -0.300 | -0.547 |
| ENSG00000103647 | <i>CORO2B</i>   | 3.84E-07  | -1.076 | -0.417 | -0.594 |
| ENSG00000047457 | <i>CP</i>       | 3.73E-35  | 2.279  | 0.759  | 1.220  |
| ENSG00000177685 | <i>CRACR2B</i>  | 2.73E-11  | -1.369 | -0.021 | -0.315 |
| ENSG00000213145 | <i>CRIP1</i>    | 2.06E-19  | -1.028 | -0.215 | -0.353 |
| ENSG00000121005 | <i>CRISPLD1</i> | 7.42E-26  | -1.716 | -0.598 | -1.002 |
| ENSG00000103196 | <i>CRISPLD2</i> | 5.89E-08  | 1.684  | 0.015  | 0.326  |
| ENSG00000226321 | <i>CROCC2</i>   | 8.83E-03  | 1.235  | 0.000  | 0.145  |
| ENSG00000095713 | <i>CRTAC1</i>   | 2.18E-13  | 1.499  | 0.045  | 0.664  |
| ENSG00000109943 | <i>CRTAM</i>    | 2.23E-03  | 1.835  | 0.010  | 0.113  |
| ENSG00000172346 | <i>CSDC2</i>    | 6.74E-05  | -1.402 | -0.053 | -0.553 |
| ENSG00000178662 | <i>CSRNP3</i>   | 1.80E-04  | -2.323 | -0.027 | -1.496 |
| ENSG00000118523 | <i>CTGF</i>     | 1.27E-14  | -1.700 | -0.413 | -0.908 |
| ENSG00000135047 | <i>CTSL</i>     | 1.61E-06  | 1.024  | 0.084  | 0.716  |
| ENSG00000163131 | <i>CTSS</i>     | 7.87E-39  | 1.910  | 0.366  | 0.803  |
| ENSG00000006210 | <i>CX3CL1</i>   | 2.52E-05  | 1.445  | 0.008  | 0.112  |
| ENSG00000163739 | <i>CXCL1</i>    | 1.92E-225 | 7.081  | 3.981  | 4.993  |
| ENSG00000081041 | <i>CXCL2</i>    | 5.60E-74  | 5.839  | 2.616  | 3.757  |
| ENSG00000163734 | <i>CXCL3</i>    | 4.31E-53  | 5.404  | 2.064  | 3.190  |
| ENSG00000163735 | <i>CXCL5</i>    | 2.00E-18  | 4.569  | 0.023  | 2.300  |

|                 |                |          |        |        |        |
|-----------------|----------------|----------|--------|--------|--------|
| ENSG00000124875 | <i>CXCL6</i>   | 1.63E-54 | 5.656  | 2.821  | 3.790  |
| ENSG00000169429 | <i>CXCL8</i>   | 2.09E-32 | 5.969  | 0.035  | 2.672  |
| ENSG00000121966 | <i>CXCR4</i>   | 3.15E-03 | 4.545  | 0.007  | 0.042  |
| ENSG00000137869 | <i>CYP19A1</i> | 1.41E-02 | 1.259  | 0.012  | 0.161  |
| ENSG0000019186  | <i>CYP24A1</i> | 1.29E-14 | 4.175  | 1.879  | 2.462  |
| ENSG00000146233 | <i>CYP39A1</i> | 1.20E-08 | -1.949 | -0.535 | -0.991 |
| ENSG00000186377 | <i>CYP4XI</i>  | 3.75E-04 | -1.046 | -0.027 | -0.310 |
| ENSG00000172817 | <i>CYP7B1</i>  | 2.17E-10 | 1.557  | 0.501  | 0.659  |
| ENSG00000205795 | <i>CYS1</i>    | 3.28E-13 | -1.851 | -0.389 | -0.888 |
| ENSG00000100592 | <i>DAAMI</i>   | 2.96E-20 | 1.149  | 0.175  | 0.420  |
| ENSG00000146122 | <i>DAAM2</i>   | 1.98E-07 | -1.014 | -0.089 | -0.593 |
| ENSG00000163331 | <i>DAPL1</i>   | 1.26E-06 | -2.523 | -0.015 | -1.630 |
| ENSG00000003249 | <i>DBNDD1</i>  | 1.76E-05 | -1.215 | -0.034 | -0.648 |
| ENSG00000105516 | <i>DBP</i>     | 2.01E-06 | -1.056 | -0.053 | -0.330 |
| ENSG00000133083 | <i>DCLK1</i>   | 7.01E-03 | -1.515 | -0.018 | -0.070 |
| ENSG00000163357 | <i>DCST1</i>   | 3.81E-02 | -1.075 | -0.009 | -0.083 |
| ENSG00000153904 | <i>DDAHI</i>   | 9.92E-19 | -1.398 | -0.400 | -0.813 |
| ENSG00000168209 | <i>DDIT4</i>   | 4.35E-05 | 1.702  | 0.018  | 0.355  |
| ENSG00000145358 | <i>DDIT4L</i>  | 5.91E-04 | 1.253  | 0.012  | 0.162  |
| ENSG00000164825 | <i>DEFB1</i>   | 3.61E-03 | 1.231  | 0.021  | 0.088  |
| ENSG00000165507 | <i>DEPPI</i>   | 3.82E-10 | 1.926  | 0.046  | 0.972  |
| ENSG00000155792 | <i>DEPTOR</i>  | 1.63E-15 | -2.207 | -0.083 | -0.908 |
| ENSG00000062282 | <i>DGAT2</i>   | 9.04E-12 | 1.749  | 0.630  | 1.305  |
| ENSG00000077044 | <i>DGKD</i>    | 1.81E-17 | 1.152  | 0.326  | 0.655  |
| ENSG00000197406 | <i>DIO3</i>    | 9.87E-03 | 2.942  | 0.008  | 0.049  |
| ENSG00000140323 | <i>DISP2</i>   | 7.79E-04 | -1.275 | -0.017 | -0.984 |
| ENSG00000132837 | <i>DMGDH</i>   | 4.38E-07 | -1.143 | -0.032 | -0.200 |
| ENSG00000115423 | <i>DNAH6</i>   | 4.98E-02 | -1.167 | -0.005 | -0.103 |
| ENSG00000187957 | <i>DNER</i>    | 2.10E-08 | 1.899  | 0.014  | 0.134  |
| ENSG00000149927 | <i>DOC2A</i>   | 1.23E-02 | -1.316 | -0.024 | -0.276 |
| ENSG00000128512 | <i>DOCK4</i>   | 9.31E-14 | 1.097  | 0.049  | 0.173  |
| ENSG00000136048 | <i>DRAM1</i>   | 1.54E-13 | 1.369  | 0.399  | 0.733  |
| ENSG00000136982 | <i>DSCC1</i>   | 5.17E-07 | -1.138 | -0.051 | -0.384 |
| ENSG00000134769 | <i>DTNA</i>    | 7.01E-06 | 1.080  | 0.001  | 0.265  |
| ENSG00000120129 | <i>DUSP1</i>   | 3.91E-16 | 1.671  | 0.317  | 0.870  |
| ENSG00000138166 | <i>DUSP5</i>   | 6.11E-12 | 1.098  | 0.071  | 0.579  |
| ENSG00000139318 | <i>DUSP6</i>   | 5.52E-17 | 1.719  | 0.501  | 0.919  |
| ENSG00000184545 | <i>DUSP8</i>   | 6.49E-21 | 1.645  | 0.630  | 0.957  |
| ENSG00000158560 | <i>DYNC11H</i> | 2.02E-11 | -1.193 | -0.150 | -0.651 |
| ENSG00000122547 | <i>EEPD1</i>   | 1.16E-07 | -1.108 | -0.292 | -0.355 |

|                 |                |          |        |        |        |
|-----------------|----------------|----------|--------|--------|--------|
| ENSG00000163576 | <i>EFHB</i>    | 7.43E-03 | -1.231 | -0.025 | -0.209 |
| ENSG00000115468 | <i>EFHD1</i>   | 4.00E-17 | -1.699 | -0.257 | -0.857 |
| ENSG00000129521 | <i>EGLN3</i>   | 2.00E-05 | 1.583  | 0.022  | 0.383  |
| ENSG00000013016 | <i>EHD3</i>    | 1.27E-05 | -1.025 | -0.054 | -0.676 |
| ENSG00000163435 | <i>ELF3</i>    | 4.95E-12 | 3.004  | 0.973  | 1.601  |
| ENSG00000128886 | <i>ELL3</i>    | 9.64E-05 | -1.023 | -0.042 | -0.688 |
| ENSG00000197977 | <i>ELOVL2</i>  | 1.21E-10 | 2.657  | 1.254  | 2.106  |
| ENSG00000164181 | <i>ELOVL7</i>  | 1.08E-03 | 1.891  | 0.006  | 0.054  |
| ENSG00000168913 | <i>ENHO</i>    | 1.13E-02 | -2.315 | -0.003 | -0.034 |
| ENSG00000198018 | <i>ENTPD7</i>  | 7.13E-20 | 1.620  | 0.290  | 0.682  |
| ENSG00000188833 | <i>ENTPD8</i>  | 2.37E-02 | -2.824 | -0.003 | -0.051 |
| ENSG00000082397 | <i>EPB41L3</i> | 7.16E-18 | 1.390  | 0.014  | 0.118  |
| ENSG00000044524 | <i>EPHA3</i>   | 3.68E-04 | -1.334 | -0.028 | -0.795 |
| ENSG00000145242 | <i>EPHA5</i>   | 3.96E-02 | -1.025 | -0.009 | -0.059 |
| ENSG00000182580 | <i>EPHB3</i>   | 1.21E-13 | -1.359 | -0.224 | -0.607 |
| ENSG00000120915 | <i>EPHX2</i>   | 6.41E-08 | -1.096 | -0.242 | -0.595 |
| ENSG00000124882 | <i>EREG</i>    | 1.59E-02 | 1.064  | 0.014  | 0.172  |
| ENSG00000178752 | <i>ERFE</i>    | 8.48E-32 | 2.633  | 0.878  | 1.763  |
| ENSG00000178607 | <i>ERN1</i>    | 2.85E-15 | 1.294  | 0.067  | 0.542  |
| ENSG00000116285 | <i>ERRF11</i>  | 7.96E-08 | 1.221  | 0.039  | 0.484  |
| ENSG00000164283 | <i>ESM1</i>    | 5.96E-07 | 1.759  | 0.037  | 0.343  |
| ENSG00000157557 | <i>ETS2</i>    | 4.64E-13 | 1.180  | 0.136  | 0.569  |
| ENSG00000139083 | <i>ETV6</i>    | 9.18E-21 | 1.194  | 0.298  | 0.600  |
| ENSG00000158008 | <i>EXTL1</i>   | 4.27E-02 | -1.109 | -0.016 | -0.081 |
| ENSG00000181104 | <i>F2R</i>     | 2.26E-16 | -1.916 | -0.065 | -0.713 |
| ENSG00000198734 | <i>F5</i>      | 9.27E-04 | 1.236  | 0.016  | 0.368  |
| ENSG00000121769 | <i>FABP3</i>   | 1.08E-20 | -1.331 | -0.307 | -0.499 |
| ENSG00000170323 | <i>FABP4</i>   | 1.48E-03 | -1.263 | -0.011 | -0.320 |
| ENSG00000169122 | <i>FAM110B</i> | 7.92E-09 | 1.083  | 0.069  | 0.561  |
| ENSG00000135842 | <i>FAM129A</i> | 1.32E-18 | -1.874 | -0.619 | -1.150 |
| ENSG00000179083 | <i>FAM133A</i> | 1.28E-04 | -1.181 | -0.034 | -0.603 |
| ENSG00000109794 | <i>FAM149A</i> | 2.06E-06 | -1.280 | -0.032 | -0.607 |
| ENSG00000154319 | <i>FAM167A</i> | 7.33E-08 | 1.511  | 0.046  | 0.734  |
| ENSG00000185442 | <i>FAM174B</i> | 6.57E-10 | 1.186  | 0.113  | 0.624  |
| ENSG00000197520 | <i>FAM177B</i> | 4.55E-28 | 4.310  | 2.489  | 3.184  |
| ENSG00000108950 | <i>FAM20A</i>  | 1.30E-26 | 2.764  | 1.197  | 1.720  |
| ENSG00000177706 | <i>FAM20C</i>  | 6.92E-20 | 1.619  | 0.427  | 0.966  |
| ENSG00000185614 | <i>FAM212A</i> | 4.71E-07 | -1.540 | -0.060 | -0.557 |
| ENSG00000157470 | <i>FAM81A</i>  | 4.30E-02 | -1.023 | -0.013 | -0.067 |
| ENSG00000162981 | <i>FAM84A</i>  | 1.02E-04 | -1.271 | -0.026 | -0.546 |

|                 |                  |          |        |        |        |
|-----------------|------------------|----------|--------|--------|--------|
| ENSG00000165323 | <i>FAT3</i>      | 7.84E-09 | -1.293 | -0.090 | -0.837 |
| ENSG00000170271 | <i>FAXDC2</i>    | 1.38E-09 | -1.342 | -0.350 | -0.796 |
| ENSG00000165140 | <i>FBP1</i>      | 9.42E-12 | -1.987 | -0.069 | -0.856 |
| ENSG00000141665 | <i>FBXO15</i>    | 3.04E-03 | -1.709 | -0.018 | -0.176 |
| ENSG00000162894 | <i>FCMR</i>      | 1.11E-04 | 1.898  | 0.001  | 0.061  |
| ENSG00000113578 | <i>FGF1</i>      | 8.21E-06 | 1.410  | 0.013  | 0.200  |
| ENSG00000070193 | <i>FGF10</i>     | 4.31E-24 | 2.227  | 0.697  | 1.249  |
| ENSG00000102466 | <i>FGF14</i>     | 7.16E-13 | -1.089 | -0.236 | -0.500 |
| ENSG00000140285 | <i>FGF7</i>      | 4.26E-31 | 1.365  | 0.505  | 0.888  |
| ENSG00000137460 | <i>FHDC1</i>     | 1.28E-04 | 1.071  | 0.016  | 0.131  |
| ENSG00000022267 | <i>FHL1</i>      | 2.13E-21 | -1.263 | -0.371 | -0.648 |
| ENSG00000118407 | <i>FILIP1</i>    | 8.06E-17 | 2.964  | 0.021  | 0.363  |
| ENSG00000204131 | <i>FLJ44635</i>  | 1.20E-02 | -1.523 | -0.019 | -0.179 |
| ENSG00000075420 | <i>FNDC3B</i>    | 1.29E-29 | 1.237  | 0.369  | 0.613  |
| ENSG00000143107 | <i>FNDC7</i>     | 2.80E-02 | -1.636 | -0.015 | -0.035 |
| ENSG00000103241 | <i>FOXF1</i>     | 7.08E-04 | 2.075  | 0.024  | 1.855  |
| ENSG00000114861 | <i>FOXP1</i>     | 3.28E-25 | 1.069  | 0.185  | 0.449  |
| ENSG00000165694 | <i>FRMD7</i>     | 1.32E-02 | -1.121 | -0.026 | -0.305 |
| ENSG00000167996 | <i>FTH1</i>      | 5.18E-31 | 1.410  | 0.322  | 0.757  |
| ENSG00000010810 | <i>FYN</i>       | 4.87E-31 | 1.242  | 0.203  | 0.555  |
| ENSG00000180340 | <i>FZD2</i>      | 7.41E-08 | -1.184 | -0.019 | -0.474 |
| ENSG00000123689 | <i>G0S2</i>      | 3.45E-30 | 4.313  | 1.375  | 2.400  |
| ENSG00000139112 | <i>GABARAPL1</i> | 4.83E-19 | 1.177  | 0.355  | 0.681  |
| ENSG00000143891 | <i>GALM</i>      | 7.21E-09 | -1.350 | -0.081 | -0.552 |
| ENSG00000131386 | <i>GALNT15</i>   | 3.92E-28 | 2.351  | 0.886  | 1.441  |
| ENSG00000131979 | <i>GCH1</i>      | 1.11E-47 | 3.628  | 0.903  | 1.758  |
| ENSG00000130513 | <i>GDF15</i>     | 2.39E-07 | 1.137  | 0.528  | 0.882  |
| ENSG00000125965 | <i>GDF5</i>      | 3.78E-19 | -1.339 | -0.349 | -0.615 |
| ENSG00000156466 | <i>GDF6</i>      | 3.71E-12 | 1.012  | 0.095  | 0.398  |
| ENSG00000143869 | <i>GDF7</i>      | 2.40E-05 | -1.355 | -0.009 | -0.583 |
| ENSG00000158555 | <i>GDPD5</i>     | 4.68E-08 | -1.045 | -0.079 | -0.435 |
| ENSG00000131459 | <i>GFPT2</i>     | 7.90E-36 | 1.887  | 0.514  | 0.997  |
| ENSG00000168546 | <i>GFRA2</i>     | 1.59E-02 | 1.679  | 0.004  | 0.066  |
| ENSG00000179855 | <i>GIPC3</i>     | 3.99E-02 | -1.063 | -0.005 | -0.115 |
| ENSG00000198814 | <i>GK</i>        | 2.40E-04 | 1.148  | 0.035  | 0.274  |
| ENSG00000074047 | <i>GLI2</i>      | 8.46E-09 | -1.453 | -0.045 | -0.931 |
| ENSG00000107249 | <i>GLIS3</i>     | 4.98E-18 | 1.345  | 0.207  | 0.594  |
| ENSG00000173221 | <i>GLRX</i>      | 1.29E-19 | 1.729  | 0.382  | 0.950  |
| ENSG00000156689 | <i>GLYATL2</i>   | 8.77E-03 | -1.236 | -0.007 | -0.217 |
| ENSG00000112312 | <i>GMNN</i>      | 2.57E-07 | 1.101  | 0.084  | 0.579  |

|                 |                  |          |        |        |        |
|-----------------|------------------|----------|--------|--------|--------|
| ENSG00000186469 | <i>GNG2</i>      | 7.01E-08 | -1.149 | -0.041 | -0.661 |
| ENSG00000176533 | <i>GNG7</i>      | 6.70E-05 | -1.317 | -0.028 | -0.213 |
| ENSG00000155265 | <i>GOLGA7B</i>   | 6.67E-05 | 1.299  | 0.013  | 0.247  |
| ENSG00000164850 | <i>GPER1</i>     | 1.47E-12 | -1.042 | -0.225 | -0.465 |
| ENSG00000112293 | <i>GPLD1</i>     | 4.15E-12 | -1.010 | -0.195 | -0.821 |
| ENSG00000180998 | <i>GPR137C</i>   | 1.62E-02 | -1.281 | -0.012 | -0.156 |
| ENSG00000158292 | <i>GPR153</i>    | 3.62E-15 | -1.223 | -0.279 | -0.611 |
| ENSG00000169508 | <i>GPR183</i>    | 2.41E-07 | 2.841  | 0.018  | 0.947  |
| ENSG00000170075 | <i>GPR37L1</i>   | 2.68E-09 | 3.043  | 0.010  | 0.106  |
| ENSG00000181656 | <i>GPR88</i>     | 2.01E-03 | 1.175  | 0.005  | 0.205  |
| ENSG00000013588 | <i>GPRC5A</i>    | 1.99E-19 | 1.863  | 0.541  | 1.080  |
| ENSG00000115290 | <i>GRB14</i>     | 4.83E-06 | 1.441  | -0.003 | 0.094  |
| ENSG00000155511 | <i>GRIAI</i>     | 1.73E-08 | -1.862 | -0.527 | -1.065 |
| ENSG00000147697 | <i>GSDMC</i>     | 8.53E-03 | 1.049  | 0.005  | -0.034 |
| ENSG00000169181 | <i>GSGIL</i>     | 1.70E-02 | -3.352 | -0.004 | -0.053 |
| ENSG00000134201 | <i>GSTM5</i>     | 8.93E-09 | -1.463 | -0.463 | -0.688 |
| ENSG00000164116 | <i>GUCY1A1</i>   | 8.76E-06 | -1.553 | -0.402 | -0.745 |
| ENSG00000061918 | <i>GUCY1B1</i>   | 3.26E-06 | -1.210 | -0.022 | -0.388 |
| ENSG00000179240 | <i>GVQW3</i>     | 7.24E-06 | -1.230 | -0.334 | -0.821 |
| ENSG00000162882 | <i>HAAO</i>      | 5.59E-05 | -1.156 | -0.067 | -0.161 |
| ENSG00000188921 | <i>HACD4</i>     | 8.18E-21 | -1.165 | -0.286 | -0.705 |
| ENSG00000170961 | <i>HAS2</i>      | 1.39E-07 | 1.691  | 0.046  | 0.944  |
| ENSG00000135077 | <i>HAVCR2</i>    | 2.96E-04 | -1.034 | -0.002 | -0.301 |
| ENSG00000103145 | <i>HCFC1R1</i>   | 9.27E-11 | -1.200 | -0.343 | -0.450 |
| ENSG00000002746 | <i>HECW1</i>     | 4.64E-09 | -1.226 | -0.060 | -0.548 |
| ENSG00000135547 | <i>HEY2</i>      | 6.04E-05 | -1.301 | -0.024 | -0.563 |
| ENSG00000177374 | <i>HIC1</i>      | 7.88E-10 | -1.406 | -0.061 | -0.499 |
| ENSG00000100644 | <i>HIF1A</i>     | 1.86E-12 | 1.171  | 0.359  | 0.662  |
| ENSG00000135245 | <i>HILPDA</i>    | 8.64E-05 | 2.547  | 0.011  | 0.142  |
| ENSG00000184678 | <i>HIST2H2BE</i> | 4.19E-13 | 1.125  | 0.120  | 0.496  |
| ENSG00000095951 | <i>HIVEP1</i>    | 2.00E-18 | 1.139  | 0.089  | 0.336  |
| ENSG00000127124 | <i>HIVEP3</i>    | 2.10E-21 | 1.695  | 0.575  | 0.701  |
| ENSG00000159399 | <i>HK2</i>       | 1.80E-06 | 1.444  | 0.030  | 0.614  |
| ENSG00000241935 | <i>HOGA1</i>     | 5.17E-07 | -1.599 | 0.002  | -0.340 |
| ENSG00000196196 | <i>HRCT1</i>     | 7.77E-03 | -1.700 | -0.014 | -0.124 |
| ENSG00000117594 | <i>HSD11B1</i>   | 4.10E-40 | 4.420  | 1.662  | 2.628  |
| ENSG00000004776 | <i>HSPB6</i>     | 1.62E-21 | -1.112 | -0.435 | -0.533 |
| ENSG00000173641 | <i>HSPB7</i>     | 1.39E-25 | -1.750 | -0.719 | -1.026 |
| ENSG00000102468 | <i>HTR2A</i>     | 6.79E-15 | 3.417  | 0.034  | 1.655  |
| ENSG00000169495 | <i>HTRA4</i>     | 4.30E-04 | 1.547  | 0.015  | 0.212  |



|                 |                |          |        |        |        |
|-----------------|----------------|----------|--------|--------|--------|
| ENSG00000090339 | <i>ICAMI</i>   | 7.71E-13 | 2.080  | 0.027  | 0.781  |
| ENSG00000115738 | <i>ID2</i>     | 1.16E-26 | 2.417  | 0.885  | 1.336  |
| ENSG00000137331 | <i>IER3</i>    | 3.41E-02 | 1.358  | 0.011  | 0.066  |
| ENSG00000185885 | <i>IFITM1</i>  | 7.17E-03 | 1.635  | 0.014  | 0.147  |
| ENSG00000142089 | <i>IFITM3</i>  | 7.08E-12 | 1.317  | 0.359  | 0.832  |
| ENSG0000017427  | <i>IGF1</i>    | 7.44E-11 | 3.407  | 0.025  | 1.588  |
| ENSG00000141753 | <i>IGFBP4</i>  | 3.85E-30 | 1.134  | 0.232  | 0.684  |
| ENSG00000164136 | <i>IL15</i>    | 3.96E-04 | 1.093  | 0.013  | 0.163  |
| ENSG00000134470 | <i>IL15RA</i>  | 9.58E-05 | 1.052  | 0.043  | 0.467  |
| ENSG00000115604 | <i>IL18R1</i>  | 4.15E-10 | 1.238  | 0.452  | 0.585  |
| ENSG00000136689 | <i>IL1RN</i>   | 2.15E-02 | 1.394  | 0.009  | 0.173  |
| ENSG00000162892 | <i>IL24</i>    | 5.89E-05 | 3.224  | 0.007  | 0.037  |
| ENSG00000104998 | <i>IL27RA</i>  | 6.73E-04 | -1.233 | -0.015 | -0.188 |
| ENSG00000164509 | <i>IL31RA</i>  | 3.25E-12 | -1.511 | -0.079 | -0.912 |
| ENSG00000136696 | <i>IL36B</i>   | 4.15E-03 | 1.027  | 0.032  | 0.830  |
| ENSG00000136695 | <i>IL36RN</i>  | 3.73E-02 | 1.626  | 0.005  | 0.073  |
| ENSG00000104951 | <i>IL4I1</i>   | 7.24E-07 | 2.266  | 0.018  | 0.378  |
| ENSG00000136244 | <i>IL6</i>     | 6.73E-32 | 7.861  | 0.023  | 3.915  |
| ENSG00000168685 | <i>IL7R</i>    | 8.14E-06 | 1.089  | 0.033  | 0.196  |
| ENSG00000122641 | <i>INHBA</i>   | 2.87E-05 | 1.408  | 0.019  | 0.282  |
| ENSG00000188487 | <i>INSC</i>    | 3.39E-05 | -1.577 | -0.048 | -1.012 |
| ENSG00000186480 | <i>INSIG1</i>  | 2.70E-16 | 1.471  | 0.062  | 0.597  |
| ENSG00000125629 | <i>INSIG2</i>  | 4.86E-36 | 1.206  | 0.204  | 0.431  |
| ENSG00000074706 | <i>IPCEF1</i>  | 1.22E-03 | -1.053 | -0.006 | -1.443 |
| ENSG00000151151 | <i>IPMK</i>    | 7.23E-09 | 1.161  | 0.062  | 0.505  |
| ENSG00000120645 | <i>IQSEC3</i>  | 2.90E-03 | -1.067 | -0.013 | -0.188 |
| ENSG00000134070 | <i>IRAK2</i>   | 2.59E-27 | 1.912  | 0.681  | 1.117  |
| ENSG00000090376 | <i>IRAK3</i>   | 8.60E-17 | 1.124  | 0.040  | 0.266  |
| ENSG00000137265 | <i>IRF4</i>    | 1.01E-02 | 1.761  | 0.010  | 0.125  |
| ENSG00000159387 | <i>IRX6</i>    | 2.49E-05 | -1.550 | -0.046 | -0.602 |
| ENSG00000101230 | <i>ISM1</i>    | 8.74E-05 | 1.006  | 0.029  | 0.330  |
| ENSG00000005961 | <i>ITGA2B</i>  | 7.71E-03 | -2.161 | -0.017 | -0.105 |
| ENSG00000115232 | <i>ITGA4</i>   | 8.51E-10 | -1.026 | -0.287 | -0.634 |
| ENSG00000105855 | <i>ITGB8</i>   | 2.11E-05 | 1.331  | 0.023  | 0.261  |
| ENSG00000150995 | <i>ITPR1</i>   | 1.03E-09 | 1.302  | 0.047  | 0.458  |
| ENSG00000148841 | <i>ITPRIP</i>  | 3.90E-13 | 1.375  | 0.076  | 0.778  |
| ENSG00000096968 | <i>JAK2</i>    | 1.26E-27 | 1.105  | 0.115  | 0.354  |
| ENSG00000188385 | <i>JAKMIP3</i> | 1.32E-04 | -1.235 | -0.031 | -0.255 |
| ENSG00000171223 | <i>JUNB</i>    | 3.47E-17 | 1.836  | 0.560  | 1.072  |
| ENSG00000158445 | <i>KCNB1</i>   | 6.22E-07 | -1.892 | -0.031 | -1.148 |

|                 |                  |          |        |        |        |
|-----------------|------------------|----------|--------|--------|--------|
| ENSG00000102057 | <i>KCND1</i>     | 2.43E-02 | -1.019 | -0.012 | -0.167 |
| ENSG00000152049 | <i>KCNE4</i>     | 4.27E-25 | 1.293  | 0.509  | 0.916  |
| ENSG00000143473 | <i>KCNHI</i>     | 1.01E-14 | 1.594  | 0.047  | 0.791  |
| ENSG00000055118 | <i>KCNH2</i>     | 1.56E-04 | -1.158 | -0.060 | -0.779 |
| ENSG00000157551 | <i>KCNJ15</i>    | 2.40E-10 | 1.409  | 0.058  | 0.992  |
| ENSG00000171303 | <i>KCNK3</i>     | 6.73E-08 | 4.271  | 0.013  | 3.340  |
| ENSG00000104783 | <i>KCNN4</i>     | 1.69E-07 | -1.192 | -0.037 | -0.500 |
| ENSG00000184156 | <i>KCNQ3</i>     | 2.03E-21 | 1.923  | 0.667  | 1.085  |
| ENSG00000156486 | <i>KCNS2</i>     | 1.06E-02 | -1.625 | 0.002  | -0.084 |
| ENSG00000170745 | <i>KCNS3</i>     | 2.64E-03 | -1.334 | -0.011 | -0.139 |
| ENSG00000180332 | <i>KCTD4</i>     | 1.56E-10 | -1.845 | -0.057 | -0.703 |
| ENSG00000138030 | <i>KHK</i>       | 6.01E-03 | -1.226 | -0.019 | -0.067 |
| ENSG00000109265 | <i>KIAA1211</i>  | 4.58E-05 | -1.109 | -0.054 | -0.664 |
| ENSG00000162849 | <i>KIF26B</i>    | 2.06E-15 | -2.017 | -0.651 | -0.986 |
| ENSG00000155980 | <i>KIF5A</i>     | 2.24E-02 | -1.404 | -0.020 | -0.091 |
| ENSG00000157404 | <i>KIT</i>       | 3.05E-06 | -1.251 | -0.710 | -0.979 |
| ENSG00000155090 | <i>KLF10</i>     | 8.15E-24 | 1.199  | 0.390  | 0.655  |
| ENSG00000171872 | <i>KLF17</i>     | 2.34E-08 | 2.206  | 0.023  | 1.025  |
| ENSG00000119138 | <i>KLF9</i>      | 2.85E-11 | 1.064  | 0.326  | 0.533  |
| ENSG00000162755 | <i>KLHDC9</i>    | 1.02E-04 | -1.346 | -0.032 | -0.303 |
| ENSG00000171345 | <i>KRT19</i>     | 1.95E-03 | -1.457 | -0.023 | -0.806 |
| ENSG00000221852 | <i>KRTAP1-5</i>  | 2.88E-08 | -1.114 | -0.311 | -0.316 |
| ENSG00000174611 | <i>KY</i>        | 2.53E-11 | -1.899 | -0.774 | -0.936 |
| ENSG00000115919 | <i>KYNU</i>      | 1.25E-18 | 3.450  | 1.416  | 2.012  |
| ENSG00000101680 | <i>LAMA1</i>     | 3.38E-07 | 1.001  | 0.156  | 0.542  |
| ENSG00000129988 | <i>LBP</i>       | 1.14E-17 | 3.270  | 0.022  | 1.339  |
| ENSG00000148346 | <i>LCN2</i>      | 2.87E-05 | 2.773  | 0.020  | 1.590  |
| ENSG00000136167 | <i>LCPI</i>      | 2.22E-02 | -1.477 | -0.016 | -0.053 |
| ENSG00000169744 | <i>LDB2</i>      | 1.17E-15 | -1.817 | -0.449 | -0.950 |
| ENSG00000134333 | <i>LDHA</i>      | 5.52E-17 | 1.237  | 0.421  | 0.718  |
| ENSG00000166816 | <i>LDHD</i>      | 1.08E-07 | -1.319 | -0.489 | -0.798 |
| ENSG00000168675 | <i>LDLRAD4</i>   | 1.26E-15 | -1.662 | -0.704 | -1.117 |
| ENSG00000106003 | <i>LFNG</i>      | 3.00E-05 | -1.194 | -0.052 | -0.639 |
| ENSG00000153012 | <i>LGI2</i>      | 3.69E-08 | -1.814 | -0.051 | -0.935 |
| ENSG00000139292 | <i>LGR5</i>      | 3.59E-07 | -1.049 | -0.295 | -0.585 |
| ENSG00000128342 | <i>LIF</i>       | 1.03E-07 | 2.250  | 0.011  | 0.180  |
| ENSG00000072163 | <i>LIMS2</i>     | 1.03E-11 | -1.317 | -0.261 | -0.608 |
| ENSG00000236882 | <i>LINC01554</i> | 5.61E-06 | 2.151  | 0.017  | 0.194  |
| ENSG00000169783 | <i>LINGO1</i>    | 6.64E-05 | -1.357 | -0.018 | -0.699 |
| ENSG00000136153 | <i>LMO7</i>      | 3.43E-15 | -1.261 | -0.189 | -0.647 |

|                 |                     |           |        |        |        |
|-----------------|---------------------|-----------|--------|--------|--------|
| ENSG00000163431 | <i>LMOD1</i>        | 2.98E-06  | -1.512 | -0.040 | -0.702 |
| ENSG00000103485 | <i>LOC105369247</i> | 1.49E-03  | -2.095 | -0.002 | -0.063 |
| ENSG00000173535 | <i>LOC254896</i>    | 8.92E-04  | -1.037 | -0.041 | -0.189 |
| ENSG00000165379 | <i>LRFN5</i>        | 1.30E-02  | -1.206 | -0.021 | -0.354 |
| ENSG00000128606 | <i>LRRC17</i>       | 2.49E-09  | -2.721 | -0.037 | -1.610 |
| ENSG00000172731 | <i>LRRC20</i>       | 3.28E-08  | -1.577 | -0.047 | -0.690 |
| ENSG00000128594 | <i>LRRC4</i>        | 2.20E-06  | -2.034 | -0.036 | -1.102 |
| ENSG00000146006 | <i>LRRTM2</i>       | 1.12E-07  | -1.450 | -0.473 | -0.591 |
| ENSG00000130592 | <i>LSP1</i>         | 2.67E-14  | -1.158 | -0.263 | -0.473 |
| ENSG00000172264 | <i>MACROD2</i>      | 1.49E-05  | -1.375 | -0.038 | -0.533 |
| ENSG00000185022 | <i>MAFF</i>         | 2.99E-31  | 1.474  | 0.635  | 0.943  |
| ENSG00000144063 | <i>MALL</i>         | 9.59E-08  | 1.106  | 0.098  | 0.610  |
| ENSG00000165072 | <i>MAMDC2</i>       | 7.68E-35  | -2.104 | -0.570 | -1.126 |
| ENSG00000196782 | <i>MAML3</i>        | 5.86E-04  | -1.231 | -1.017 | -1.138 |
| ENSG00000013619 | <i>MAMLD1</i>       | 2.35E-20  | -1.770 | -0.748 | -1.382 |
| ENSG00000176909 | <i>MAMSTR</i>       | 3.04E-04  | -1.423 | -0.035 | -0.290 |
| ENSG00000069535 | <i>MAOB</i>         | 1.16E-15  | 1.803  | 0.052  | 0.622  |
| ENSG00000197769 | <i>MAPILC3C</i>     | 5.86E-13  | -2.132 | -1.052 | -1.715 |
| ENSG00000108984 | <i>MAP2K6</i>       | 5.48E-08  | -2.502 | -0.827 | -1.438 |
| ENSG00000107968 | <i>MAP3K8</i>       | 1.85E-188 | 2.425  | 1.551  | 1.929  |
| ENSG00000186868 | <i>MAPT</i>         | 1.17E-02  | -1.235 | -0.019 | -0.713 |
| ENSG00000186205 | <i>MARCI</i>        | 8.69E-05  | -1.215 | -0.629 | -0.541 |
| ENSG00000173926 | <i>MARCH3</i>       | 1.68E-15  | 2.353  | 0.014  | 0.655  |
| ENSG00000144583 | <i>MARCH4</i>       | 1.52E-03  | -1.606 | -0.018 | -0.704 |
| ENSG00000172197 | <i>MBOAT1</i>       | 1.29E-10  | -1.210 | -0.092 | -0.868 |
| ENSG00000140563 | <i>MCTP2</i>        | 1.30E-06  | 1.065  | 0.021  | 0.217  |
| ENSG00000102802 | <i>MEDAG</i>        | 4.18E-37  | 2.175  | 0.820  | 1.351  |
| ENSG00000106511 | <i>MEOX2</i>        | 2.16E-21  | -1.828 | -0.423 | -1.094 |
| ENSG00000188095 | <i>MESP2</i>        | 3.57E-02  | -1.320 | -0.012 | -0.135 |
| ENSG00000170439 | <i>METTL7B</i>      | 1.78E-07  | -2.638 | -0.029 | -1.219 |
| ENSG00000168389 | <i>MFSD2A</i>       | 7.40E-09  | 2.118  | 0.036  | 1.157  |
| ENSG00000174514 | <i>MFSD4A</i>       | 2.24E-02  | -1.057 | -0.017 | -0.783 |
| ENSG00000108960 | <i>MMD</i>          | 1.86E-10  | 1.187  | 0.689  | 0.761  |
| ENSG00000196549 | <i>MME</i>          | 1.59E-10  | 1.361  | 0.047  | 0.474  |
| ENSG00000196611 | <i>MMP1</i>         | 1.83E-39  | 6.069  | 1.925  | 3.486  |
| ENSG00000166670 | <i>MMP10</i>        | 1.15E-11  | 2.147  | 0.014  | 0.419  |
| ENSG00000137745 | <i>MMP13</i>        | 2.54E-35  | 3.161  | 0.037  | 1.131  |
| ENSG00000149968 | <i>MMP3</i>         | 7.44E-59  | 4.451  | 0.798  | 1.889  |
| ENSG00000120162 | <i>MOB3B</i>        | 2.94E-04  | -0.715 | -1.202 | -0.217 |
| ENSG00000186732 | <i>MPPED1</i>       | 5.45E-03  | -1.342 | -0.009 | -0.945 |

|                 |                  |           |        |        |        |
|-----------------|------------------|-----------|--------|--------|--------|
| ENSG00000066382 | <i>MPPED2</i>    | 4.07E-05  | -1.193 | -0.040 | -0.469 |
| ENSG00000156968 | <i>MPV17L</i>    | 1.06E-07  | -1.718 | -0.037 | -0.998 |
| ENSG00000135324 | <i>MRAP2</i>     | 2.12E-15  | -1.915 | -0.644 | -1.070 |
| ENSG00000184350 | <i>MRGPRE</i>    | 2.08E-02  | -1.190 | -0.007 | -0.170 |
| ENSG00000072952 | <i>MRVII</i>     | 3.51E-15  | -1.650 | -0.470 | -1.144 |
| ENSG00000178860 | <i>MSC</i>       | 8.42E-07  | 1.032  | 0.033  | 0.277  |
| ENSG00000205362 | <i>MT1A</i>      | 1.09E-02  | 1.320  | 0.017  | 0.057  |
| ENSG00000169715 | <i>MT1E</i>      | 3.11E-14  | 1.362  | 0.488  | 0.934  |
| ENSG00000198417 | <i>MT1F</i>      | 2.43E-17  | 2.308  | 0.049  | 1.192  |
| ENSG00000125144 | <i>MT1G</i>      | 1.83E-09  | 3.682  | 0.024  | 2.092  |
| ENSG00000205364 | <i>MT1M</i>      | 8.46E-08  | 1.277  | 0.041  | 0.518  |
| ENSG00000187193 | <i>MT1X</i>      | 1.12E-14  | 2.105  | 0.681  | 1.340  |
| ENSG00000125148 | <i>MT2A</i>      | 4.18E-47  | 2.423  | 0.980  | 1.507  |
| ENSG00000242114 | <i>MTFP1</i>     | 5.72E-04  | 1.613  | 0.027  | 0.818  |
| ENSG00000185499 | <i>MUC1</i>      | 1.09E-06  | 1.112  | 0.348  | 0.610  |
| ENSG00000133055 | <i>MYBPH</i>     | 2.52E-10  | 1.754  | 0.544  | 1.003  |
| ENSG00000136449 | <i>MYCBPAP</i>   | 2.90E-04  | -1.234 | -0.052 | -0.666 |
| ENSG00000065534 | <i>MYLK</i>      | 5.17E-08  | -1.189 | -0.073 | -0.790 |
| ENSG00000128833 | <i>MYO5C</i>     | 5.30E-03  | -1.058 | -0.023 | -0.329 |
| ENSG00000034971 | <i>MYOC</i>      | 2.57E-14  | -1.238 | -0.441 | -0.734 |
| ENSG00000105835 | <i>NAMPT</i>     | 9.42E-20  | 3.291  | 0.037  | 1.523  |
| ENSG00000186462 | <i>NAPIL2</i>    | 2.21E-05  | -1.184 | -0.475 | -0.503 |
| ENSG00000186310 | <i>NAPIL3</i>    | 4.37E-07  | -1.375 | -0.038 | -0.687 |
| ENSG00000156006 | <i>NAT2</i>      | 3.67E-03  | -1.105 | -0.044 | -0.178 |
| ENSG00000067798 | <i>NAV3</i>      | 8.35E-05  | -1.072 | -0.035 | -0.567 |
| ENSG00000160796 | <i>NBEAL2</i>    | 3.67E-05  | -1.076 | -0.074 | -0.788 |
| ENSG00000104490 | <i>NCALD</i>     | 1.84E-05  | -1.977 | -0.028 | -0.519 |
| ENSG00000154654 | <i>NCAM2</i>     | 3.37E-11  | 2.096  | 0.034  | 0.896  |
| ENSG00000124479 | <i>NDP</i>       | 7.29E-06  | 1.865  | 0.014  | 0.173  |
| ENSG00000104419 | <i>NDRG1</i>     | 6.40E-16  | 1.720  | 0.073  | 0.803  |
| ENSG00000165795 | <i>NDRG2</i>     | 7.29E-06  | -1.302 | -0.021 | -0.584 |
| ENSG00000165030 | <i>NFIL3</i>     | 3.99E-21  | 1.858  | 0.438  | 1.058  |
| ENSG00000077150 | <i>NFKB2</i>     | 2.86E-16  | 1.108  | 0.037  | 0.339  |
| ENSG00000100906 | <i>NFKBIA</i>    | 1.63E-67  | 2.447  | 0.889  | 1.343  |
| ENSG00000144802 | <i>NFKBIZ</i>    | 2.09E-246 | 3.596  | 2.648  | 2.975  |
| ENSG00000257108 | <i>NHLRC4</i>    | 2.57E-02  | -1.066 | -0.019 | -0.085 |
| ENSG00000204131 | <i>NHSL2</i>     | 1.20E-02  | -1.523 | -0.019 | -0.179 |
| ENSG00000165028 | <i>NIPSNAP3B</i> | 2.75E-06  | -1.095 | -0.336 | -0.463 |
| ENSG00000140807 | <i>NKD1</i>      | 4.11E-06  | -1.014 | -0.043 | -0.825 |
| ENSG00000167034 | <i>NKX3-1</i>    | 8.92E-18  | 1.420  | 0.426  | 0.511  |

|                 |                    |          |        |        |        |
|-----------------|--------------------|----------|--------|--------|--------|
| ENSG00000182261 | <i>NLRP10</i>      | 4.17E-05 | -2.052 | -0.020 | -0.847 |
| ENSG00000166741 | <i>NNMT</i>        | 1.43E-42 | 2.245  | 0.990  | 1.587  |
| ENSG00000151014 | <i>NOCT</i>        | 4.89E-08 | 1.256  | 0.031  | 0.548  |
| ENSG00000167207 | <i>NOD2</i>        | 2.53E-24 | 4.202  | 0.024  | 2.032  |
| ENSG00000007171 | <i>NOS2</i>        | 7.49E-36 | 7.417  | 4.309  | 5.152  |
| ENSG00000163072 | <i>NOSTRIN</i>     | 4.57E-02 | -1.134 | -0.005 | -0.002 |
| ENSG00000136999 | <i>NOV</i>         | 4.23E-12 | -1.249 | -0.062 | -0.419 |
| ENSG00000139910 | <i>NOVA1</i>       | 5.31E-09 | 1.037  | 0.118  | 0.593  |
| ENSG00000171246 | <i>NPTX1</i>       | 1.63E-10 | -1.653 | -0.607 | -0.832 |
| ENSG00000144852 | <i>NR1I2</i>       | 3.85E-02 | -1.893 | -0.012 | -0.032 |
| ENSG00000151623 | <i>NR3C2</i>       | 7.96E-16 | -1.322 | -0.309 | -0.643 |
| ENSG00000153234 | <i>NR4A2</i>       | 2.87E-12 | 1.755  | 0.068  | 0.798  |
| ENSG00000119508 | <i>NR4A3</i>       | 2.63E-29 | 2.536  | 0.865  | 1.557  |
| ENSG00000134986 | <i>NREP</i>        | 1.58E-15 | -1.584 | -0.520 | -0.995 |
| ENSG00000118257 | <i>NRP2</i>        | 9.77E-17 | 1.388  | 0.160  | 0.660  |
| ENSG00000065320 | <i>NTN1</i>        | 1.89E-13 | 1.528  | 0.386  | 0.982  |
| ENSG00000148053 | <i>NTRK2</i>       | 4.29E-12 | -1.044 | -0.335 | -0.722 |
| ENSG00000186364 | <i>NUDT17</i>      | 2.27E-05 | -1.084 | -0.039 | -0.779 |
| ENSG00000182575 | <i>NXPH3</i>       | 6.62E-09 | -1.428 | -0.416 | -0.977 |
| ENSG00000205978 | <i>NYNRIN</i>      | 3.89E-08 | -1.090 | -0.192 | -0.597 |
| ENSG00000154358 | <i>OBSCN</i>       | 1.43E-18 | -1.093 | -0.384 | -0.605 |
| ENSG00000177989 | <i>ODF3B</i>       | 2.35E-06 | 1.401  | 0.043  | 0.698  |
| ENSG00000105088 | <i>OLFM2</i>       | 8.91E-14 | -1.224 | -0.255 | -0.441 |
| ENSG00000183801 | <i>OLFML1</i>      | 2.80E-04 | -1.793 | -0.035 | -0.503 |
| ENSG00000162745 | <i>OLFML2B</i>     | 1.45E-13 | -1.123 | -0.243 | -0.460 |
| ENSG00000127083 | <i>OMD</i>         | 3.59E-10 | -1.017 | -0.102 | -0.606 |
| ENSG00000183715 | <i>OPCML</i>       | 1.39E-02 | -1.587 | -0.018 | -0.102 |
| ENSG00000125510 | <i>OPRL1</i>       | 4.77E-05 | -1.003 | -0.040 | -0.518 |
| ENSG00000070882 | <i>OSBPL3</i>      | 2.33E-18 | -1.226 | -0.353 | -0.711 |
| ENSG00000006025 | <i>OSBPL7</i>      | 2.70E-08 | -1.162 | -0.125 | -0.601 |
| ENSG00000145623 | <i>OSMR</i>        | 2.37E-40 | 2.286  | 0.869  | 1.354  |
| ENSG00000180914 | <i>OXTR</i>        | 1.12E-03 | -1.421 | -0.018 | -0.105 |
| ENSG00000099957 | <i>P2RX6</i>       | 1.85E-06 | -1.437 | -0.037 | -0.787 |
| ENSG00000076641 | <i>PAG1</i>        | 2.47E-06 | 1.096  | 0.033  | 0.222  |
| ENSG00000243444 | <i>PALM2</i>       | 6.84E-08 | 1.626  | 0.064  | 1.128  |
| ENSG00000157654 | <i>PALM2-AKAP2</i> | 3.63E-03 | 2.753  | 0.006  | 0.068  |
| ENSG00000099260 | <i>PALMD</i>       | 8.47E-22 | 1.838  | 0.610  | 1.063  |
| ENSG00000162073 | <i>PAQR4</i>       | 1.16E-04 | -1.095 | -0.013 | -0.213 |
| ENSG00000102981 | <i>PARD6A</i>      | 3.84E-04 | -1.009 | -0.055 | -0.703 |
| ENSG00000173599 | <i>PC</i>          | 1.16E-08 | 1.102  | 0.094  | 0.595  |

|                 |                 |          |        |        |        |
|-----------------|-----------------|----------|--------|--------|--------|
| ENSG00000183570 | <i>PCBP3</i>    | 2.24E-09 | 1.408  | 0.017  | 0.330  |
| ENSG00000150275 | <i>PCDH15</i>   | 9.74E-03 | 1.621  | 0.010  | 0.034  |
| ENSG00000189184 | <i>PCDH18</i>   | 1.18E-07 | -1.175 | -0.370 | -0.875 |
| ENSG00000124253 | <i>PCK1</i>     | 3.93E-04 | 4.552  | 0.006  | 0.072  |
| ENSG00000175426 | <i>PCSK1</i>    | 3.51E-17 | 1.822  | 0.362  | 0.911  |
| ENSG00000172572 | <i>PDE3A</i>    | 1.27E-09 | 1.132  | 0.010  | 0.083  |
| ENSG00000184588 | <i>PDE4B</i>    | 1.22E-61 | 2.876  | 1.289  | 1.816  |
| ENSG00000113448 | <i>PDE4D</i>    | 1.21E-26 | 2.308  | 0.456  | 1.006  |
| ENSG00000138735 | <i>PDE5A</i>    | 7.21E-12 | -2.086 | -0.605 | -1.322 |
| ENSG00000170962 | <i>PDGFD</i>    | 1.10E-10 | -1.129 | -0.119 | -0.568 |
| ENSG00000152256 | <i>PDK1</i>     | 1.17E-15 | 1.455  | 0.228  | 0.679  |
| ENSG00000162493 | <i>PDPN</i>     | 2.79E-23 | 1.576  | 0.557  | 1.008  |
| ENSG00000186862 | <i>PDZD7</i>    | 6.67E-03 | -1.008 | -0.018 | -0.609 |
| ENSG00000162366 | <i>PDZK1IP1</i> | 4.96E-09 | 2.736  | 0.026  | 1.388  |
| ENSG00000109272 | <i>PF4V1</i>    | 1.88E-03 | 2.203  | 0.018  | 1.334  |
| ENSG00000170525 | <i>PFKFB3</i>   | 1.36E-09 | 1.320  | 0.080  | 0.711  |
| ENSG00000070087 | <i>PFN2</i>     | 4.22E-20 | -1.150 | -0.289 | -0.579 |
| ENSG00000176732 | <i>PFN4</i>     | 5.81E-03 | -1.269 | -0.017 | -0.170 |
| ENSG00000119630 | <i>PGF</i>      | 5.62E-08 | 2.104  | 0.006  | 0.080  |
| ENSG00000102144 | <i>PGK1</i>     | 7.99E-12 | 1.083  | 0.245  | 0.540  |
| ENSG00000153823 | <i>PID1</i>     | 4.07E-27 | 1.845  | 0.017  | 0.266  |
| ENSG00000137193 | <i>PIM1</i>     | 8.32E-19 | 1.371  | 0.588  | 1.037  |
| ENSG00000198355 | <i>PIM3</i>     | 5.24E-13 | 1.384  | 0.515  | 0.885  |
| ENSG00000154217 | <i>PITPNC1</i>  | 2.86E-05 | 1.126  | 0.027  | 0.413  |
| ENSG00000166473 | <i>PKD1L2</i>   | 6.35E-06 | -1.692 | -0.017 | -1.149 |
| ENSG00000165495 | <i>PKNOX2</i>   | 4.56E-37 | 2.080  | 0.482  | 1.166  |
| ENSG00000138193 | <i>PLCE1</i>    | 1.01E-16 | -1.461 | -0.450 | -0.944 |
| ENSG00000075651 | <i>PLD1</i>     | 7.71E-67 | 2.041  | 0.598  | 1.030  |
| ENSG00000021300 | <i>PLEKHB1</i>  | 1.03E-03 | -1.057 | -0.018 | -0.142 |
| ENSG00000171680 | <i>PLEKHG5</i>  | 5.12E-08 | -1.025 | -0.234 | -0.379 |
| ENSG00000147872 | <i>PLIN2</i>    | 2.19E-03 | 1.060  | 0.025  | 0.435  |
| ENSG00000145632 | <i>PLK2</i>     | 1.70E-08 | 1.122  | 0.024  | 0.201  |
| ENSG00000152952 | <i>PLOD2</i>    | 2.87E-12 | 1.370  | 0.249  | 0.620  |
| ENSG00000120756 | <i>PLS1</i>     | 5.92E-04 | -1.200 | -0.036 | -0.442 |
| ENSG00000188313 | <i>PLSCR1</i>   | 3.32E-03 | 1.213  | 0.005  | 0.073  |
| ENSG00000221866 | <i>PLXNA4</i>   | 4.69E-09 | 3.372  | 1.266  | 1.980  |
| ENSG00000141682 | <i>PMAIP1</i>   | 1.81E-10 | 1.965  | 0.979  | 1.539  |
| ENSG00000182013 | <i>PNMA8A</i>   | 6.63E-06 | -1.479 | -0.030 | -0.915 |
| ENSG00000204851 | <i>PNMA8B</i>   | 1.14E-04 | -1.291 | -0.042 | -0.446 |
| ENSG00000130653 | <i>PNPLA7</i>   | 1.23E-08 | -1.385 | -0.092 | -0.712 |

|                 |                 |          |        |        |        |
|-----------------|-----------------|----------|--------|--------|--------|
| ENSG00000146278 | <i>PNRC1</i>    | 4.82E-06 | 1.054  | 0.025  | 0.273  |
| ENSG00000028277 | <i>POU2F2</i>   | 1.15E-29 | 2.726  | 1.458  | 1.909  |
| ENSG00000109819 | <i>PPARGCIA</i> | 2.83E-03 | 1.321  | 0.027  | 0.644  |
| ENSG00000110841 | <i>PPFIBP1</i>  | 2.21E-19 | 1.046  | 0.176  | 0.470  |
| ENSG00000108179 | <i>PPIF</i>     | 5.14E-16 | 1.278  | 0.395  | 0.791  |
| ENSG00000156475 | <i>PPP2R2B</i>  | 6.70E-11 | -2.243 | -0.045 | -1.067 |
| ENSG00000214140 | <i>PRCD</i>     | 1.96E-02 | -1.622 | -0.013 | -0.106 |
| ENSG00000057657 | <i>PRDM1</i>    | 2.00E-04 | 1.887  | 0.010  | 0.099  |
| ENSG00000186652 | <i>PRG2</i>     | 1.81E-02 | 1.104  | 0.032  | 0.516  |
| ENSG00000139174 | <i>PRICKLE1</i> | 2.64E-10 | -1.465 | -0.455 | -0.998 |
| ENSG00000146143 | <i>PRIM2</i>    | 1.14E-08 | -1.246 | -0.077 | -0.616 |
| ENSG00000175785 | <i>PRIMA1</i>   | 1.11E-03 | -1.537 | -0.006 | -0.280 |
| ENSG00000005249 | <i>PRKAR2B</i>  | 7.90E-23 | 1.903  | 0.063  | 0.994  |
| ENSG00000138669 | <i>PRKG2</i>    | 5.05E-04 | -1.822 | -0.028 | -0.314 |
| ENSG00000135406 | <i>PRPH</i>     | 1.71E-06 | -1.918 | -0.037 | -0.518 |
| ENSG00000167371 | <i>PRRT2</i>    | 1.99E-12 | -1.247 | -0.409 | -0.676 |
| ENSG00000146250 | <i>PRSS35</i>   | 1.28E-11 | -2.521 | -0.046 | -1.041 |
| ENSG00000125637 | <i>PSD4</i>     | 6.35E-08 | 1.226  | 0.065  | 0.595  |
| ENSG00000117425 | <i>PTCH2</i>    | 2.59E-09 | -1.434 | -0.073 | -0.783 |
| ENSG00000148344 | <i>PTGES</i>    | 6.11E-14 | 2.616  | 0.022  | 0.466  |
| ENSG00000122420 | <i>PTGFR</i>    | 1.91E-45 | 2.022  | 0.871  | 1.315  |
| ENSG00000073756 | <i>PTGS2</i>    | 4.17E-12 | 3.153  | 0.016  | 0.546  |
| ENSG00000087494 | <i>PTHLH</i>    | 9.10E-07 | 1.282  | 0.561  | 1.080  |
| ENSG00000163629 | <i>PTPN13</i>   | 2.79E-14 | -1.131 | -0.366 | -0.767 |
| ENSG00000163661 | <i>PTX3</i>     | 4.05E-04 | 1.148  | 0.038  | 0.566  |
| ENSG00000068976 | <i>PYGM</i>     | 4.76E-03 | -1.517 | -0.025 | -0.396 |
| ENSG00000103485 | <i>QPRT</i>     | 1.49E-03 | -2.095 | -0.002 | -0.063 |
| ENSG00000139832 | <i>RAB20</i>    | 2.62E-04 | 1.252  | 0.032  | 0.677  |
| ENSG00000167964 | <i>RAB26</i>    | 9.84E-06 | -1.505 | -0.034 | -0.465 |
| ENSG00000041353 | <i>RAB27B</i>   | 1.02E-25 | 2.460  | 1.060  | 1.576  |
| ENSG00000172794 | <i>RAB37</i>    | 1.75E-04 | -1.168 | -0.035 | -0.530 |
| ENSG00000169750 | <i>RAC3</i>     | 5.60E-10 | -1.220 | -0.057 | -0.306 |
| ENSG00000166349 | <i>RAG1</i>     | 1.73E-04 | -1.221 | -0.018 | -0.840 |
| ENSG00000164188 | <i>RANBP3L</i>  | 2.29E-02 | -1.006 | 0.001  | -0.093 |
| ENSG00000108551 | <i>RASD1</i>    | 2.39E-10 | 2.710  | 0.024  | 1.313  |
| ENSG00000103710 | <i>RASL12</i>   | 1.29E-05 | -1.542 | -0.038 | -0.967 |
| ENSG00000163694 | <i>RBM47</i>    | 3.45E-04 | 1.122  | 0.037  | 0.494  |
| ENSG00000159200 | <i>RCAN1</i>    | 2.03E-07 | 1.210  | 0.024  | 0.337  |
| ENSG00000172348 | <i>RCAN2</i>    | 7.86E-18 | -3.059 | -0.077 | -1.624 |
| ENSG00000167771 | <i>RCOR2</i>    | 5.78E-05 | -1.537 | -0.033 | -0.566 |

|                 |                |          |        |        |        |
|-----------------|----------------|----------|--------|--------|--------|
| ENSG00000104856 | <i>RELB</i>    | 2.20E-22 | 1.716  | 0.334  | 0.760  |
| ENSG00000054967 | <i>RELT</i>    | 3.67E-06 | 1.316  | 0.022  | 0.982  |
| ENSG00000088320 | <i>REMI</i>    | 1.07E-04 | -1.040 | -0.037 | -0.306 |
| ENSG00000174236 | <i>REP15</i>   | 1.99E-04 | 1.104  | 0.039  | 0.467  |
| ENSG00000154153 | <i>RETREG1</i> | 1.18E-17 | 1.586  | 0.356  | 0.817  |
| ENSG00000009413 | <i>REV3L</i>   | 2.18E-17 | 1.223  | 0.154  | 0.477  |
| ENSG00000178882 | <i>RFLNA</i>   | 2.75E-04 | -1.472 | -0.038 | -0.755 |
| ENSG00000131378 | <i>RFTN1</i>   | 1.55E-18 | -1.043 | -0.387 | -0.651 |
| ENSG00000143333 | <i>RGS16</i>   | 2.21E-13 | 1.196  | 0.341  | 0.625  |
| ENSG00000132554 | <i>RGS22</i>   | 1.49E-02 | -1.142 | -0.024 | -0.206 |
| ENSG00000108370 | <i>RGS9</i>    | 1.58E-02 | -1.429 | -0.015 | -0.133 |
| ENSG00000072422 | <i>RHOBTB1</i> | 3.65E-17 | -1.372 | -0.532 | -0.866 |
| ENSG00000111913 | <i>RIPOR2</i>  | 4.17E-06 | 1.034  | 0.020  | 0.222  |
| ENSG00000042062 | <i>RIPOR3</i>  | 6.20E-07 | 1.573  | 0.014  | 0.670  |
| ENSG00000108830 | <i>RND2</i>    | 9.52E-04 | -1.250 | -0.020 | -0.157 |
| ENSG00000101695 | <i>RNF125</i>  | 1.10E-03 | -1.462 | -0.019 | -0.917 |
| ENSG00000137393 | <i>RNF144B</i> | 2.03E-10 | 1.068  | 0.008  | 0.124  |
| ENSG00000108375 | <i>RNF43</i>   | 3.04E-05 | -1.388 | -0.057 | -0.583 |
| ENSG00000185008 | <i>ROBO2</i>   | 1.81E-07 | -0.969 | -0.279 | -1.007 |
| ENSG00000169071 | <i>ROR2</i>    | 4.34E-06 | 1.114  | 0.086  | 0.511  |
| ENSG00000143365 | <i>RORC</i>    | 2.25E-02 | -1.433 | -0.015 | -0.133 |
| ENSG00000156313 | <i>RPGR</i>    | 2.81E-09 | 1.026  | 0.271  | 0.686  |
| ENSG00000215853 | <i>RPTN</i>    | 1.48E-02 | -1.545 | -0.016 | -0.157 |
| ENSG00000166592 | <i>RRAD</i>    | 1.48E-05 | 1.292  | 0.033  | 0.589  |
| ENSG00000146374 | <i>RSPO3</i>   | 4.14E-20 | 1.701  | 0.633  | 1.056  |
| ENSG00000179300 | <i>RTL3</i>    | 1.32E-04 | -1.032 | -0.040 | -0.438 |
| ENSG00000242732 | <i>RTL5</i>    | 3.00E-17 | -1.066 | -0.425 | -0.529 |
| ENSG00000040608 | <i>RTN4R</i>   | 4.82E-02 | -1.059 | 0.000  | -0.070 |
| ENSG00000186907 | <i>RTN4RL2</i> | 3.21E-09 | 2.475  | 0.029  | 1.593  |
| ENSG00000171509 | <i>RXFP1</i>   | 2.70E-03 | 1.111  | 0.030  | 0.109  |
| ENSG00000170989 | <i>SIPRI</i>   | 5.56E-11 | 1.886  | 0.537  | 1.197  |
| ENSG00000213694 | <i>SIPR3</i>   | 1.23E-05 | 1.144  | 0.030  | 0.454  |
| ENSG00000173432 | <i>SAA1</i>    | 2.81E-28 | 6.628  | 0.033  | 4.583  |
| ENSG00000134339 | <i>SAA2</i>    | 1.63E-17 | 6.156  | 0.030  | 4.201  |
| ENSG00000177570 | <i>SAMD12</i>  | 8.30E-06 | -1.894 | -0.012 | -0.956 |
| ENSG00000203943 | <i>SAMD13</i>  | 5.60E-04 | -1.538 | -0.024 | -0.684 |
| ENSG00000164483 | <i>SAMD3</i>   | 1.34E-02 | -1.185 | -0.008 | -0.171 |
| ENSG00000203727 | <i>SAMD5</i>   | 8.65E-15 | -1.299 | -0.267 | -0.728 |
| ENSG00000123453 | <i>SARDH</i>   | 6.98E-05 | -1.678 | -0.026 | -0.550 |
| ENSG00000130066 | <i>SATI</i>    | 1.03E-30 | 1.594  | 0.276  | 0.648  |



|                 |                 |          |        |        |        |
|-----------------|-----------------|----------|--------|--------|--------|
| ENSG0000064932  | <i>SBNO2</i>    | 7.65E-27 | 1.791  | 0.783  | 1.247  |
| ENSG0000073060  | <i>SCARB1</i>   | 3.38E-12 | 1.087  | 0.370  | 0.685  |
| ENSG00000184178 | <i>SCFD2</i>    | 2.13E-10 | -1.104 | -0.409 | -0.653 |
| ENSG00000171951 | <i>SCG2</i>     | 3.17E-06 | 1.217  | 0.428  | 0.888  |
| ENSG00000161929 | <i>SCIMP</i>    | 6.46E-04 | -1.006 | -0.013 | -0.521 |
| ENSG00000006747 | <i>SCIN</i>     | 1.97E-06 | -1.206 | -0.041 | -0.542 |
| ENSG00000136531 | <i>SCN2A</i>    | 6.29E-03 | -1.399 | -0.017 | -0.340 |
| ENSG00000149575 | <i>SCN2B</i>    | 1.97E-08 | -1.536 | -0.050 | -0.568 |
| ENSG00000153253 | <i>SCN3A</i>    | 5.28E-03 | -1.499 | -0.010 | -0.838 |
| ENSG00000103184 | <i>SEC14L5</i>  | 4.45E-04 | -1.255 | -0.591 | -0.829 |
| ENSG00000120341 | <i>SEC16B</i>   | 3.21E-05 | -1.076 | -0.035 | -0.696 |
| ENSG00000174175 | <i>SELP</i>     | 3.55E-04 | 1.944  | 0.009  | 0.148  |
| ENSG00000170381 | <i>SEMA3E</i>   | 1.31E-14 | -1.120 | -0.188 | -0.596 |
| ENSG00000137872 | <i>SEMA6D</i>   | 1.75E-05 | 1.014  | 0.018  | 0.174  |
| ENSG00000108387 | <i>SEPT4</i>    | 1.86E-05 | -1.468 | -0.036 | -0.658 |
| ENSG00000135919 | <i>SERPINE2</i> | 4.30E-11 | 1.381  | 0.056  | 0.539  |
| ENSG00000198879 | <i>SFMBT2</i>   | 1.84E-08 | 1.439  | 0.004  | 0.195  |
| ENSG00000104332 | <i>SFRP1</i>    | 8.13E-11 | 2.622  | 0.031  | 1.204  |
| ENSG00000167037 | <i>SGSM1</i>    | 5.88E-04 | -1.524 | -0.013 | -0.112 |
| ENSG00000183918 | <i>SH2D1A</i>   | 1.57E-02 | -1.499 | -0.011 | -0.103 |
| ENSG00000169247 | <i>SH3TC2</i>   | 4.95E-03 | -1.051 | -0.020 | -0.676 |
| ENSG00000162105 | <i>SHANK2</i>   | 1.54E-05 | -1.122 | -0.057 | -0.680 |
| ENSG00000107338 | <i>SHB</i>      | 1.68E-17 | 1.951  | 0.422  | 1.116  |
| ENSG00000185634 | <i>SHC4</i>     | 7.72E-07 | -1.502 | -0.477 | -0.702 |
| ENSG00000138771 | <i>SHROOM3</i>  | 2.40E-13 | -1.768 | -0.622 | -1.255 |
| ENSG00000197046 | <i>SIGLEC15</i> | 4.55E-03 | -1.345 | -0.019 | -0.930 |
| ENSG00000142178 | <i>SIK1</i>     | 4.87E-16 | 2.314  | 0.038  | 1.065  |
| ENSG00000198053 | <i>SIRPA</i>    | 3.08E-34 | 1.125  | 0.116  | 0.409  |
| ENSG00000101307 | <i>SIRPB1</i>   | 1.20E-04 | 1.119  | 0.031  | 0.163  |
| ENSG00000110911 | <i>SLC11A2</i>  | 1.21E-34 | 1.278  | 0.495  | 0.731  |
| ENSG00000141469 | <i>SLC14A1</i>  | 2.60E-16 | -3.065 | -1.073 | -1.855 |
| ENSG00000112394 | <i>SLC16A10</i> | 9.05E-07 | 3.011  | 0.003  | 0.089  |
| ENSG00000174326 | <i>SLC16A11</i> | 2.40E-02 | -1.070 | -0.016 | 0.011  |
| ENSG00000163053 | <i>SLC16A14</i> | 2.86E-06 | -1.387 | -0.033 | -0.592 |
| ENSG00000141526 | <i>SLC16A3</i>  | 2.02E-11 | 1.187  | 0.253  | 0.723  |
| ENSG00000108932 | <i>SLC16A6</i>  | 4.90E-02 | 1.236  | 0.004  | 0.011  |
| ENSG00000118596 | <i>SLC16A7</i>  | 2.84E-12 | 1.629  | 0.059  | 0.591  |
| ENSG00000165449 | <i>SLC16A9</i>  | 1.05E-05 | -1.593 | -0.041 | -0.436 |
| ENSG00000146409 | <i>SLC18B1</i>  | 1.41E-13 | 1.132  | 0.097  | 0.451  |
| ENSG00000117479 | <i>SLC19A2</i>  | 1.26E-12 | 1.334  | 0.069  | 0.654  |

|                 |                     |          |        |        |        |
|-----------------|---------------------|----------|--------|--------|--------|
| ENSG00000135917 | <i>SLC19A3</i>      | 1.32E-43 | 3.422  | 1.244  | 2.043  |
| ENSG00000112499 | <i>SLC22A2</i>      | 7.10E-03 | 1.944  | 0.003  | 0.024  |
| ENSG00000137266 | <i>SLC22A23</i>     | 9.23E-20 | 1.576  | 0.620  | 0.964  |
| ENSG00000258708 | <i>SLC25A21-AS1</i> | 6.55E-03 | -1.002 | -0.031 | -0.357 |
| ENSG00000155287 | <i>SLC25A28</i>     | 1.62E-21 | 1.803  | 0.185  | 0.818  |
| ENSG00000147454 | <i>SLC25A37</i>     | 1.43E-11 | 1.069  | 0.040  | 0.306  |
| ENSG00000091137 | <i>SLC26A4</i>      | 3.33E-07 | -1.623 | -0.046 | -0.932 |
| ENSG00000174502 | <i>SLC26A9</i>      | 2.87E-05 | 2.849  | 0.001  | 0.067  |
| ENSG00000143554 | <i>SLC27A3</i>      | 4.65E-09 | -1.113 | -0.056 | -0.408 |
| ENSG00000117394 | <i>SLC2A1</i>       | 2.22E-06 | 1.119  | 0.026  | 0.473  |
| ENSG00000146411 | <i>SLC2A12</i>      | 1.70E-09 | -1.417 | -0.060 | -0.882 |
| ENSG00000059804 | <i>SLC2A3</i>       | 1.72E-06 | 1.590  | 0.033  | 0.740  |
| ENSG00000142583 | <i>SLC2A5</i>       | 1.50E-23 | 2.401  | 0.893  | 1.618  |
| ENSG00000170385 | <i>SLC30A1</i>      | 4.90E-27 | 1.591  | 0.522  | 0.818  |
| ENSG00000139209 | <i>SLC38A4</i>      | 4.18E-05 | -1.631 | -0.022 | -0.983 |
| ENSG00000104635 | <i>SLC39A14</i>     | 3.49E-63 | 3.314  | 1.548  | 2.172  |
| ENSG00000138821 | <i>SLC39A8</i>      | 6.20E-40 | 3.420  | 0.048  | 1.223  |
| ENSG00000138449 | <i>SLC40A1</i>      | 2.74E-15 | -1.888 | -0.079 | -0.930 |
| ENSG00000167703 | <i>SLC43A2</i>      | 6.82E-43 | 2.283  | 0.761  | 1.247  |
| ENSG00000134802 | <i>SLC43A3</i>      | 1.38E-27 | 1.441  | 0.406  | 0.840  |
| ENSG00000180638 | <i>SLC47A2</i>      | 3.29E-09 | -1.426 | -0.261 | -0.466 |
| ENSG00000131389 | <i>SLC6A6</i>       | 5.46E-06 | 1.261  | 0.036  | 0.374  |
| ENSG00000196517 | <i>SLC6A9</i>       | 1.99E-06 | 1.089  | 0.043  | 0.550  |
| ENSG00000003989 | <i>SLC7A2</i>       | 5.29E-29 | 3.335  | 0.804  | 1.424  |
| ENSG00000103257 | <i>SLC7A5</i>       | 4.02E-10 | 1.743  | 0.039  | 0.736  |
| ENSG00000183023 | <i>SLC8A1</i>       | 1.00E-17 | -1.473 | -0.428 | -0.946 |
| ENSG00000124107 | <i>SLPI</i>         | 4.44E-10 | 1.593  | 0.042  | 0.885  |
| ENSG00000198732 | <i>SMOC1</i>        | 2.13E-04 | 1.385  | 0.011  | 0.172  |
| ENSG00000088826 | <i>SMOX</i>         | 2.44E-10 | 1.584  | 0.449  | 0.837  |
| ENSG00000124216 | <i>SNAIL</i>        | 5.57E-05 | 1.017  | 0.057  | 0.435  |
| ENSG00000065609 | <i>SNAP91</i>       | 1.17E-02 | -1.169 | -0.014 | -1.511 |
| ENSG00000023608 | <i>SNAPC1</i>       | 1.09E-11 | 1.102  | 0.346  | 0.619  |
| ENSG00000145335 | <i>SNCA</i>         | 7.74E-03 | -1.663 | -0.008 | -0.063 |
| ENSG00000064692 | <i>SNCAIP</i>       | 1.36E-02 | -1.093 | -0.030 | -0.169 |
| ENSG00000173267 | <i>SNCG</i>         | 5.00E-11 | -1.374 | -0.092 | -0.485 |
| ENSG00000184557 | <i>SOCS3</i>        | 2.99E-31 | 1.734  | 0.544  | 1.037  |
| ENSG00000112096 | <i>SOD2</i>         | 1.02E-44 | 4.185  | 1.970  | 2.777  |
| ENSG00000112096 | <i>SOD2-OT1</i>     | 1.02E-44 | 4.185  | 1.970  | 2.777  |
| ENSG00000137642 | <i>SORL1</i>        | 2.25E-06 | -1.024 | -0.244 | -0.817 |
| ENSG00000137098 | <i>SPAG8</i>        | 1.90E-03 | -1.073 | -0.029 | -0.424 |

|                 |                   |          |        |        |        |
|-----------------|-------------------|----------|--------|--------|--------|
| ENSG00000164266 | <i>SPINK1</i>     | 2.27E-02 | 1.480  | 0.019  | 1.844  |
| ENSG00000187678 | <i>SPRY4</i>      | 1.89E-10 | 1.449  | 0.021  | 0.432  |
| ENSG00000137877 | <i>SPTBN5</i>     | 1.88E-03 | -1.169 | -0.035 | -1.017 |
| ENSG00000196542 | <i>SPTSSB</i>     | 2.34E-09 | -2.019 | -0.054 | -1.195 |
| ENSG00000122862 | <i>SRGN</i>       | 7.70E-23 | 1.195  | 0.041  | 0.298  |
| ENSG00000184343 | <i>SRPK3</i>      | 6.40E-05 | -1.339 | -0.020 | -0.545 |
| ENSG00000117155 | <i>SSX2IP</i>     | 1.90E-10 | -1.174 | -0.051 | -0.495 |
| ENSG00000144057 | <i>ST6GAL2</i>    | 6.48E-03 | -1.614 | -0.021 | -0.095 |
| ENSG00000136840 | <i>ST6GALNAC4</i> | 1.35E-13 | 1.020  | 0.371  | 0.660  |
| ENSG00000141750 | <i>STAC2</i>      | 3.87E-08 | 2.019  | 0.017  | 0.660  |
| ENSG00000168610 | <i>STAT3</i>      | 5.08E-31 | 1.279  | 0.465  | 0.811  |
| ENSG00000159167 | <i>STC1</i>       | 2.29E-40 | 4.459  | 1.831  | 2.826  |
| ENSG00000164647 | <i>STEAP1</i>     | 1.18E-45 | 2.596  | 0.880  | 1.521  |
| ENSG00000157214 | <i>STEAP2</i>     | 4.31E-24 | 1.844  | 0.085  | 0.719  |
| ENSG00000127954 | <i>STEAP4</i>     | 1.34E-12 | 2.272  | 0.040  | 0.895  |
| ENSG00000165209 | <i>STRBP</i>      | 7.30E-16 | -1.072 | -0.271 | -0.513 |
| ENSG00000128578 | <i>STRIP2</i>     | 2.18E-11 | 1.818  | 0.834  | 1.360  |
| ENSG00000135604 | <i>STX11</i>      | 1.05E-03 | 1.177  | 0.028  | 0.541  |
| ENSG00000130540 | <i>SULT4A1</i>    | 4.48E-05 | 1.355  | -0.002 | 0.112  |
| ENSG00000078269 | <i>SYNJ2</i>      | 1.68E-23 | 1.294  | 0.469  | 0.747  |
| ENSG00000182253 | <i>SYNM</i>       | 1.57E-19 | -1.167 | -0.318 | -0.625 |
| ENSG00000143028 | <i>SYPL2</i>      | 2.83E-02 | -1.091 | -0.006 | -0.050 |
| ENSG0000019505  | <i>SYT13</i>      | 1.33E-02 | -1.629 | -0.008 | -0.136 |
| ENSG00000137501 | <i>SYTL2</i>      | 9.06E-08 | -1.076 | -0.069 | -0.535 |
| ENSG00000165929 | <i>TC2N</i>       | 2.56E-09 | 2.618  | 0.019  | 1.394  |
| ENSG00000081059 | <i>TCF7</i>       | 2.28E-11 | -1.165 | -0.069 | -0.407 |
| ENSG00000182134 | <i>TDRKH</i>      | 1.44E-04 | -1.218 | -0.027 | -0.640 |
| ENSG00000120156 | <i>TEK</i>        | 8.87E-08 | -1.877 | -0.045 | -1.082 |
| ENSG00000105825 | <i>TFPI2</i>      | 1.65E-07 | 2.166  | 0.023  | 0.842  |
| ENSG00000072274 | <i>TFRC</i>       | 3.83E-14 | 1.188  | 0.458  | 0.663  |
| ENSG00000092969 | <i>TGFB2</i>      | 9.61E-19 | -1.089 | -0.409 | -0.715 |
| ENSG00000106799 | <i>TGFBR1</i>     | 1.02E-22 | 1.125  | 0.300  | 0.561  |
| ENSG00000177426 | <i>TGIF1</i>      | 1.38E-11 | 1.042  | 0.259  | 0.596  |
| ENSG00000157150 | <i>TIMP4</i>      | 5.58E-07 | -1.138 | -0.039 | -0.482 |
| ENSG00000137462 | <i>TLR2</i>       | 4.35E-06 | 2.375  | 0.009  | 0.104  |
| ENSG00000187554 | <i>TLR5</i>       | 3.71E-05 | -1.362 | -0.040 | -0.703 |
| ENSG00000166292 | <i>TMEM100</i>    | 7.77E-11 | 2.097  | 0.771  | 0.944  |
| ENSG00000183160 | <i>TMEM119</i>    | 1.53E-23 | -2.257 | -0.682 | -1.119 |
| ENSG00000166448 | <i>TMEM130</i>    | 1.57E-02 | -1.677 | -0.014 | -0.147 |
| ENSG00000157111 | <i>TMEM171</i>    | 4.35E-13 | -1.651 | -0.516 | -1.198 |

|                 |                  |          |        |        |        |
|-----------------|------------------|----------|--------|--------|--------|
| ENSG00000172738 | <i>TMEM217</i>   | 8.14E-06 | 1.647  | 0.025  | 0.838  |
| ENSG00000196932 | <i>TMEM26</i>    | 9.94E-24 | -2.393 | -0.813 | -1.337 |
| ENSG00000126950 | <i>TMEM35A</i>   | 1.73E-05 | -2.574 | -0.020 | -0.257 |
| ENSG00000171227 | <i>TMEM37</i>    | 2.49E-03 | -1.280 | -0.033 | -0.864 |
| ENSG00000147027 | <i>TMEM47</i>    | 1.94E-34 | -1.079 | -0.395 | -0.728 |
| ENSG00000136842 | <i>TMOD1</i>     | 7.91E-20 | 2.336  | 0.786  | 1.473  |
| ENSG00000128872 | <i>TMOD2</i>     | 2.31E-05 | -1.158 | -0.042 | -0.790 |
| ENSG00000041982 | <i>TNC</i>       | 3.92E-14 | 1.354  | 0.075  | 0.616  |
| ENSG00000185215 | <i>TNFAIP2</i>   | 1.79E-24 | 1.668  | 0.071  | 0.535  |
| ENSG00000118503 | <i>TNFAIP3</i>   | 2.62E-50 | 1.978  | 0.262  | 0.675  |
| ENSG00000123610 | <i>TNFAIP6</i>   | 9.68E-38 | 5.293  | 1.605  | 2.813  |
| ENSG00000145779 | <i>TNFAIP8</i>   | 6.62E-12 | 1.202  | 0.010  | 0.184  |
| ENSG00000173535 | <i>TNFRSF10C</i> | 8.92E-04 | -1.037 | -0.041 | -0.189 |
| ENSG00000164761 | <i>TNFRSF11B</i> | 2.72E-15 | 1.711  | 0.580  | 0.971  |
| ENSG00000127863 | <i>TNFRSF19</i>  | 1.00E-17 | -2.323 | -0.753 | -1.361 |
| ENSG00000028137 | <i>TNFRSF1B</i>  | 6.99E-21 | 2.501  | 0.464  | 1.185  |
| ENSG00000049249 | <i>TNFRSF9</i>   | 1.70E-04 | 1.759  | 0.007  | 0.062  |
| ENSG00000121858 | <i>TNFSF10</i>   | 3.79E-02 | 1.039  | 0.010  | 0.051  |
| ENSG00000120659 | <i>TNFSF11</i>   | 5.25E-04 | 2.614  | 0.010  | 0.123  |
| ENSG00000154310 | <i>TNIK</i>      | 2.64E-14 | 1.084  | 0.219  | 0.328  |
| ENSG00000131746 | <i>TNS4</i>      | 1.18E-05 | 1.562  | 0.028  | 0.695  |
| ENSG00000198846 | <i>TOX</i>       | 1.00E-12 | -2.133 | -0.060 | -1.047 |
| ENSG00000078804 | <i>TP53INP2</i>  | 3.82E-25 | 1.166  | 0.216  | 0.569  |
| ENSG00000111669 | <i>TPI1</i>      | 1.53E-12 | 1.024  | 0.260  | 0.588  |
| ENSG00000056972 | <i>TRAF3IP2</i>  | 1.81E-17 | 1.010  | 0.325  | 0.637  |
| ENSG00000124731 | <i>TREM1</i>     | 3.71E-09 | 3.986  | 0.010  | 1.826  |
| ENSG00000173334 | <i>TRIB1</i>     | 9.21E-19 | 1.772  | 0.837  | 1.302  |
| ENSG00000121060 | <i>TRIM25</i>    | 2.96E-06 | 1.020  | 0.008  | 0.157  |
| ENSG00000134253 | <i>TRIM45</i>    | 1.69E-07 | -1.413 | -0.046 | -0.880 |
| ENSG00000158022 | <i>TRIM63</i>    | 3.45E-02 | 1.631  | 0.016  | 0.133  |
| ENSG00000137672 | <i>TRPC6</i>     | 2.99E-06 | -1.897 | -0.025 | -0.760 |
| ENSG00000157514 | <i>TSC22D3</i>   | 2.73E-24 | -1.014 | -0.255 | -0.374 |
| ENSG00000099282 | <i>TSPAN15</i>   | 1.58E-04 | -1.463 | -0.032 | -0.238 |
| ENSG00000157570 | <i>TSPAN18</i>   | 6.47E-07 | -1.570 | -0.036 | -0.681 |
| ENSG00000064201 | <i>TSPAN32</i>   | 2.54E-07 | -1.578 | -0.026 | -0.736 |
| ENSG00000122691 | <i>TWIST1</i>    | 2.52E-17 | 1.387  | 0.456  | 0.825  |
| ENSG00000025708 | <i>TYMP</i>      | 3.81E-11 | 2.102  | 0.046  | 1.054  |
| ENSG00000145040 | <i>UCN2</i>      | 5.69E-05 | 1.270  | -0.003 | 0.000  |
| ENSG00000112715 | <i>VEGFA</i>     | 2.62E-08 | 1.960  | 0.030  | 0.796  |
| ENSG00000112299 | <i>VNN1</i>      | 1.20E-31 | 3.323  | 0.048  | 1.656  |

|                 |                     |          |        |        |        |
|-----------------|---------------------|----------|--------|--------|--------|
| ENSG00000112303 | <i>VNN2</i>         | 1.89E-02 | 1.555  | 0.003  | 0.056  |
| ENSG00000093134 | <i>VNN3</i>         | 7.11E-26 | 5.096  | 0.014  | 2.715  |
| ENSG00000214376 | <i>VSTM5</i>        | 5.62E-04 | -2.034 | -0.008 | -0.722 |
| ENSG00000188730 | <i>VWC2</i>         | 4.69E-04 | 1.596  | 0.024  | 1.410  |
| ENSG00000166272 | <i>WBP1L</i>        | 5.64E-24 | 1.051  | 0.272  | 0.627  |
| ENSG00000162643 | <i>WDR63</i>        | 8.08E-04 | -1.140 | -0.036 | -0.504 |
| ENSG00000187260 | <i>WDR86</i>        | 1.46E-06 | 1.905  | 0.005  | 0.236  |
| ENSG00000103175 | <i>WFDC1</i>        | 5.21E-07 | -1.376 | -0.439 | -0.887 |
| ENSG00000070540 | <i>WIP11</i>        | 4.81E-26 | 1.542  | 0.497  | 0.888  |
| ENSG00000104415 | <i>WISP1</i>        | 4.73E-20 | 1.562  | 0.052  | 0.488  |
| ENSG00000114251 | <i>WNT5A</i>        | 1.37E-10 | 1.138  | 0.057  | 0.352  |
| ENSG00000075035 | <i>WSCD2</i>        | 8.32E-19 | -1.953 | -0.649 | -1.198 |
| ENSG00000146457 | <i>WTAP</i>         | 1.64E-42 | 2.368  | 0.830  | 1.355  |
| ENSG00000047597 | <i>XK</i>           | 8.54E-03 | -0.855 | -0.025 | -1.347 |
| ENSG00000103489 | <i>XYLT1</i>        | 5.83E-11 | 1.129  | 0.055  | 0.439  |
| ENSG00000166793 | <i>YPEL4</i>        | 4.03E-06 | -1.011 | -0.102 | -0.356 |
| ENSG00000163874 | <i>ZC3H12A</i>      | 5.33E-56 | 3.384  | 1.932  | 2.424  |
| ENSG00000066185 | <i>ZMYND12</i>      | 1.60E-05 | -1.369 | -0.011 | -0.202 |
| ENSG00000168661 | <i>ZNF30</i>        | 1.15E-04 | -1.093 | -0.038 | -0.232 |
| ENSG00000161642 | <i>ZNF385A</i>      | 7.29E-07 | 1.101  | 0.107  | 0.644  |
| ENSG00000144331 | <i>ZNF385B</i>      | 1.09E-04 | -1.022 | -0.019 | -0.233 |
| ENSG00000175322 | <i>ZNF519</i>       | 7.13E-05 | -1.299 | -0.038 | -0.375 |
| ENSG00000176472 | <i>ZNF575</i>       | 1.39E-05 | -1.149 | -0.033 | -0.439 |
| ENSG00000178882 | <i>ZNF664-RFLNA</i> | 2.75E-04 | -1.472 | -0.038 | -0.755 |
| ENSG00000143067 | <i>ZNF697</i>       | 5.77E-09 | 1.141  | 0.063  | 0.670  |
| ENSG00000164684 | <i>ZNF704</i>       | 7.74E-11 | -1.126 | -0.187 | -0.626 |
| ENSG00000197385 | <i>ZNF860</i>       | 2.75E-07 | -1.183 | -0.024 | -0.839 |
| ENSG00000132003 | <i>ZSWIM4</i>       | 9.33E-10 | 1.152  | 0.078  | 0.566  |

**Supplementary Table 5.** Overview of differentially expressed genes in end-stage osteoarthritis-derived synovial fibroblasts between vehicle control and IL-17 treatment (10 ng/ml) with an adjusted p-value of <0.05. Green boxes note logarithmic fold changes (LFC) of at least +1 and red boxes note LFC of at least -1, while blank boxes show an LFC -1 and 1. Genes are sorted alphabetically on SYMBOL gene name.

| Ensemble gene name | SYMBOL gene name | Adjusted p-value | Log2 Fold Change (LFC) |        |         |
|--------------------|------------------|------------------|------------------------|--------|---------|
|                    |                  |                  | IL-17A                 | IL-17F | IL-17AF |
| ENSG00000198691    | <i>ABCA4</i>     | 1.41E-02         | 1.608                  | 0.017  | 0.043   |
| ENSG00000129048    | <i>ACKR4</i>     | 5.44E-07         | -1.132                 | -0.024 | -0.075  |
| ENSG00000068366    | <i>ACSL4</i>     | 9.93E-17         | 1.072                  | 0.213  | 0.352   |
| ENSG00000159251    | <i>ACTC1</i>     | 1.15E-08         | -1.709                 | -0.823 | -0.968  |
| ENSG00000138316    | <i>ADAMTS14</i>  | 1.06E-11         | -1.173                 | -0.374 | -0.541  |
| ENSG00000158859    | <i>ADAMTS4</i>   | 9.61E-03         | 1.363                  | 0.009  | 0.040   |
| ENSG00000111452    | <i>ADGRD1</i>    | 2.21E-11         | 1.993                  | 0.041  | 0.900   |
| ENSG00000150594    | <i>ADRA2A</i>    | 6.37E-04         | -1.397                 | -0.017 | -0.053  |
| ENSG00000111863    | <i>ADTRP</i>     | 5.40E-04         | 1.027                  | 0.047  | 0.505   |
| ENSG00000042286    | <i>AIFM2</i>     | 2.05E-16         | 1.192                  | 0.445  | 0.637   |
| ENSG00000154027    | <i>AK5</i>       | 3.95E-03         | -1.120                 | -0.032 | -0.074  |
| ENSG00000171819    | <i>ANGPTL7</i>   | 2.52E-04         | -2.096                 | -0.020 | -0.068  |
| ENSG00000151150    | <i>ANK3</i>      | 1.35E-06         | -1.430                 | -0.020 | -0.055  |
| ENSG00000154856    | <i>APCDD1</i>    | 1.24E-03         | 1.100                  | 0.023  | 0.496   |
| ENSG00000171388    | <i>APLN</i>      | 6.14E-08         | 1.679                  | 0.684  | 1.079   |
| ENSG00000221963    | <i>APOL6</i>     | 9.66E-10         | 1.078                  | 0.555  | 0.682   |
| ENSG00000165272    | <i>AQP3</i>      | 2.16E-10         | -1.920                 | -0.951 | -1.104  |
| ENSG00000165269    | <i>AQP7</i>      | 8.36E-07         | -1.958                 | -0.030 | -0.786  |
| ENSG00000103569    | <i>AQP9</i>      | 2.07E-10         | 3.261                  | 0.018  | 1.766   |
| ENSG00000106819    | <i>ASPN</i>      | 6.59E-05         | -1.163                 | -0.390 | -0.592  |
| ENSG00000018625    | <i>ATPIA2</i>    | 1.75E-02         | -1.055                 | -0.024 | -0.065  |
| ENSG00000104043    | <i>ATP8B4</i>    | 3.24E-04         | 1.082                  | 0.416  | 0.666   |
| ENSG00000140379    | <i>BCL2A1</i>    | 2.38E-09         | 2.812                  | 0.033  | 1.549   |
| ENSG00000069399    | <i>BCL3</i>      | 1.61E-38         | 1.728                  | 0.849  | 1.037   |
| ENSG00000100739    | <i>BDKRB1</i>    | 5.09E-05         | 1.169                  | 0.021  | 0.066   |
| ENSG00000023445    | <i>BIRC3</i>     | 1.25E-08         | 1.167                  | 0.009  | 0.048   |
| ENSG00000153162    | <i>BMP6</i>      | 1.28E-06         | 1.711                  | 0.024  | 0.101   |
| ENSG00000166920    | <i>CI5orf48</i>  | 2.19E-25         | 4.851                  | 0.024  | 2.328   |
| ENSG00000145861    | <i>CIQTNF2</i>   | 2.92E-08         | -1.767                 | -0.036 | -0.322  |
| ENSG00000163145    | <i>CIQTNF7</i>   | 2.41E-03         | -1.068                 | 0.006  | -0.004  |
| ENSG00000139178    | <i>CIRL</i>      | 7.97E-26         | 1.331                  | 0.943  | 1.039   |
| ENSG00000198535    | <i>C2CD4A</i>    | 8.65E-12         | 2.015                  | 0.037  | 0.742   |

|                 |                 |          |        |        |        |
|-----------------|-----------------|----------|--------|--------|--------|
| ENSG00000205502 | <i>C2CD4B</i>   | 2.47E-13 | 2.029  | 0.020  | 1.095  |
| ENSG00000125730 | <i>C3</i>       | 7.08E-08 | 1.400  | 0.034  | 0.514  |
| ENSG00000134830 | <i>C5AR2</i>    | 2.21E-02 | 1.194  | 0.007  | 0.030  |
| ENSG00000074410 | <i>CAI2</i>     | 9.22E-12 | 1.017  | 0.324  | 0.450  |
| ENSG00000204682 | <i>CASC10</i>   | 1.13E-03 | -1.142 | -0.002 | -0.076 |
| ENSG00000143318 | <i>CASQ1</i>    | 4.27E-03 | -1.458 | -0.014 | 0.003  |
| ENSG00000198624 | <i>CCDC69</i>   | 4.54E-05 | 1.282  | 0.031  | 0.676  |
| ENSG00000181374 | <i>CCL13</i>    | 3.19E-03 | 2.551  | 0.004  | 0.022  |
| ENSG00000108691 | <i>CCL2</i>     | 7.03E-09 | 2.150  | 0.023  | 0.769  |
| ENSG00000115009 | <i>CCL20</i>    | 3.46E-15 | 6.252  | 0.021  | 0.068  |
| ENSG00000163823 | <i>CCR1</i>     | 1.93E-03 | 1.096  | 0.016  | 0.097  |
| ENSG00000126353 | <i>CCR7</i>     | 1.97E-05 | 2.089  | 0.018  | 1.022  |
| ENSG00000004468 | <i>CD38</i>     | 2.02E-03 | 1.861  | 0.001  | 0.007  |
| ENSG00000121594 | <i>CD80</i>     | 2.00E-03 | 2.310  | 0.009  | 0.017  |
| ENSG00000163814 | <i>CDCP1</i>    | 9.80E-14 | 1.655  | 0.592  | 0.903  |
| ENSG00000138395 | <i>CDK15</i>    | 8.80E-04 | -1.863 | 0.001  | -0.034 |
| ENSG00000221869 | <i>CEBPD</i>    | 8.01E-19 | 1.888  | 0.792  | 1.063  |
| ENSG00000105792 | <i>CFAP69</i>   | 1.38E-18 | 1.498  | 0.494  | 0.605  |
| ENSG00000243649 | <i>CFB</i>      | 8.25E-13 | 1.676  | 0.035  | 0.625  |
| ENSG00000138135 | <i>CH25H</i>    | 3.82E-03 | 2.043  | 0.004  | 0.030  |
| ENSG00000016391 | <i>CHDH</i>     | 1.54E-05 | -1.015 | -0.376 | -0.096 |
| ENSG00000064886 | <i>CHI3L2</i>   | 8.97E-24 | 3.314  | 0.770  | 1.760  |
| ENSG00000159212 | <i>CLIC6</i>    | 2.02E-06 | 1.648  | 0.029  | 0.866  |
| ENSG00000134326 | <i>CMPK2</i>    | 1.93E-02 | 1.671  | 0.871  | 0.039  |
| ENSG00000154529 | <i>CNTNAP3B</i> | 4.06E-03 | -1.012 | -0.029 | -0.604 |
| ENSG00000100473 | <i>COCH</i>     | 3.55E-04 | 1.317  | 0.026  | 0.028  |
| ENSG00000204291 | <i>COL15A1</i>  | 7.51E-06 | 1.019  | 0.382  | 0.583  |
| ENSG00000081052 | <i>COL4A4</i>   | 2.92E-03 | 1.067  | 0.019  | 0.037  |
| ENSG00000047457 | <i>CP</i>       | 3.00E-24 | 1.472  | 0.475  | 0.707  |
| ENSG00000108342 | <i>CSF3</i>     | 8.69E-18 | 8.823  | 0.023  | 5.969  |
| ENSG00000135047 | <i>CTSL</i>     | 3.03E-30 | 1.443  | 0.659  | 0.865  |
| ENSG00000163131 | <i>CTSS</i>     | 1.35E-23 | 1.492  | 0.261  | 0.648  |
| ENSG00000163739 | <i>CXCL1</i>    | 3.52E-43 | 7.132  | 4.338  | 4.983  |
| ENSG00000081041 | <i>CXCL2</i>    | 1.76E-25 | 4.725  | 2.923  | 3.067  |
| ENSG00000163734 | <i>CXCL3</i>    | 2.85E-28 | 4.971  | 2.435  | 2.917  |
| ENSG00000163735 | <i>CXCL5</i>    | 2.70E-14 | 3.685  | 0.018  | 1.398  |
| ENSG00000124875 | <i>CXCL6</i>    | 2.68E-27 | 6.126  | 3.437  | 4.140  |
| ENSG00000169429 | <i>CXCL8</i>    | 2.64E-19 | 3.686  | 0.918  | 1.386  |
| ENSG00000137869 | <i>CYP19A1</i>  | 2.38E-06 | 1.844  | 1.032  | 1.569  |
| ENSG00000172817 | <i>CYP7B1</i>   | 2.19E-03 | 1.703  | 0.012  | 0.045  |

|                 |                 |          |        |        |        |
|-----------------|-----------------|----------|--------|--------|--------|
| ENSG00000164488 | <i>DACT2</i>    | 1.80E-04 | 2.179  | 0.019  | 1.661  |
| ENSG00000123977 | <i>DAWI</i>     | 3.19E-05 | 2.235  | 0.023  | 0.982  |
| ENSG00000164825 | <i>DEFB1</i>    | 3.48E-02 | 1.159  | 0.009  | 0.029  |
| ENSG00000165507 | <i>DEPP1</i>    | 2.11E-09 | 1.402  | 0.468  | 0.598  |
| ENSG00000062282 | <i>DGAT2</i>    | 4.02E-25 | 2.007  | 1.117  | 1.327  |
| ENSG00000211448 | <i>DIO2</i>     | 7.23E-07 | 1.661  | 0.028  | 0.603  |
| ENSG00000149927 | <i>DOC2A</i>    | 6.79E-03 | -1.323 | -0.012 | -0.051 |
| ENSG00000102385 | <i>DRP2</i>     | 8.72E-06 | -1.610 | -0.046 | -0.556 |
| ENSG00000134769 | <i>DTNA</i>     | 1.24E-12 | 1.162  | 0.430  | 0.546  |
| ENSG00000139318 | <i>DUSP6</i>    | 5.38E-11 | 1.498  | 0.509  | 0.782  |
| ENSG00000136160 | <i>EDNRB</i>    | 8.44E-10 | 1.099  | 0.420  | 0.637  |
| ENSG00000164181 | <i>ELOVL7</i>   | 9.27E-10 | 1.698  | 0.034  | 0.763  |
| ENSG00000198018 | <i>ENTPD7</i>   | 9.37E-09 | 1.030  | 0.092  | 0.282  |
| ENSG00000133106 | <i>EPST11</i>   | 6.45E-03 | 1.281  | 0.926  | 0.818  |
| ENSG00000124882 | <i>EREG</i>     | 3.28E-04 | 1.095  | 0.027  | 0.222  |
| ENSG00000178752 | <i>ERFE</i>     | 2.16E-09 | 1.346  | 0.331  | 0.802  |
| ENSG00000139083 | <i>ETV6</i>     | 3.02E-11 | 1.014  | 0.474  | 0.633  |
| ENSG00000185862 | <i>EVI2B</i>    | 3.69E-10 | 1.934  | 0.585  | 1.265  |
| ENSG00000110723 | <i>EXPH5</i>    | 7.62E-13 | -1.347 | -0.569 | -0.886 |
| ENSG00000181104 | <i>F2R</i>      | 1.33E-13 | -1.213 | -0.052 | -0.400 |
| ENSG00000121769 | <i>FABP3</i>    | 7.39E-12 | -1.154 | -0.536 | -0.697 |
| ENSG00000170323 | <i>FABP4</i>    | 1.11E-03 | -1.406 | -0.028 | -0.058 |
| ENSG00000150510 | <i>FAM124A</i>  | 2.79E-08 | 1.299  | 0.039  | 0.634  |
| ENSG00000159784 | <i>FAM131B</i>  | 1.16E-02 | -1.061 | -0.015 | -0.065 |
| ENSG00000147724 | <i>FAM135B</i>  | 1.68E-03 | -1.137 | -0.031 | -0.079 |
| ENSG00000148541 | <i>FAM13C</i>   | 1.77E-03 | -1.198 | -0.021 | -0.091 |
| ENSG00000197520 | <i>FAM177B</i>  | 1.94E-04 | 1.496  | 0.016  | 0.621  |
| ENSG00000204767 | <i>FAM196B</i>  | 4.71E-03 | 1.046  | 0.436  | 0.398  |
| ENSG00000164125 | <i>FAM198B</i>  | 4.24E-18 | 1.249  | 0.595  | 0.661  |
| ENSG00000108950 | <i>FAM20A</i>   | 8.35E-15 | 1.680  | 0.614  | 0.949  |
| ENSG00000185112 | <i>FAM43A</i>   | 1.50E-05 | -1.107 | -0.041 | -0.370 |
| ENSG00000165323 | <i>FAT3</i>     | 1.34E-07 | -1.146 | -0.364 | -0.833 |
| ENSG00000146267 | <i>FAXC</i>     | 1.07E-02 | -1.332 | -0.002 | -0.015 |
| ENSG00000162894 | <i>FCMR</i>     | 2.36E-03 | 1.275  | -0.005 | 0.020  |
| ENSG00000118407 | <i>FILIP1</i>   | 4.84E-02 | 1.127  | 0.005  | 0.020  |
| ENSG00000204131 | <i>FLJ44635</i> | 1.19E-03 | -1.201 | -0.020 | -0.110 |
| ENSG00000125848 | <i>FLRT3</i>    | 1.24E-09 | 2.141  | 0.026  | 0.746  |
| ENSG00000138759 | <i>FRAS1</i>    | 7.46E-05 | 1.587  | 0.019  | 0.986  |
| ENSG00000131386 | <i>GALNT15</i>  | 1.58E-19 | 1.225  | 0.569  | 0.720  |
| ENSG00000162645 | <i>GBP2</i>     | 1.19E-05 | 1.262  | 0.025  | 0.618  |



|                 |                |          |        |        |        |
|-----------------|----------------|----------|--------|--------|--------|
| ENSG00000131979 | <i>GCHI</i>    | 4.03E-04 | 1.401  | 0.011  | 0.044  |
| ENSG00000131459 | <i>GFPT2</i>   | 3.48E-12 | 1.017  | 0.163  | 0.436  |
| ENSG00000168546 | <i>GFRA2</i>   | 3.87E-02 | 1.130  | 0.017  | 0.062  |
| ENSG00000165474 | <i>GJB2</i>    | 4.02E-06 | 1.112  | 0.017  | 0.169  |
| ENSG00000107249 | <i>GLIS3</i>   | 4.46E-16 | 1.251  | 0.353  | 0.499  |
| ENSG00000173221 | <i>GLRX</i>    | 2.16E-13 | 1.168  | 0.399  | 0.589  |
| ENSG00000127920 | <i>GNG11</i>   | 5.58E-23 | 1.276  | 0.582  | 0.763  |
| ENSG00000167588 | <i>GPD1</i>    | 3.10E-07 | -1.705 | -0.031 | -0.121 |
| ENSG00000164850 | <i>GPER1</i>   | 6.99E-09 | -1.022 | -0.123 | -0.132 |
| ENSG00000158292 | <i>GPR153</i>  | 4.90E-17 | -1.122 | -0.413 | -0.514 |
| ENSG00000105509 | <i>HAS1</i>    | 2.72E-06 | 1.649  | 0.016  | 0.081  |
| ENSG00000188290 | <i>HES4</i>    | 2.65E-04 | 1.072  | 0.033  | 1.028  |
| ENSG00000135245 | <i>HILPDA</i>  | 4.57E-08 | 1.764  | 0.014  | 0.059  |
| ENSG00000127124 | <i>HIVEP3</i>  | 1.30E-07 | 1.548  | 0.726  | 0.538  |
| ENSG00000108924 | <i>HLF</i>     | 2.21E-07 | -1.564 | -0.833 | -1.054 |
| ENSG00000164120 | <i>HPGD</i>    | 1.14E-05 | -3.144 | -0.019 | -0.049 |
| ENSG00000117594 | <i>HSD11B1</i> | 9.16E-15 | 1.219  | 0.466  | 0.628  |
| ENSG00000169271 | <i>HSPB3</i>   | 1.77E-03 | -1.657 | -0.018 | -0.057 |
| ENSG00000173641 | <i>HSPB7</i>   | 2.12E-21 | -1.279 | -0.470 | -0.586 |
| ENSG00000102468 | <i>HTR2A</i>   | 2.72E-04 | 1.727  | 0.017  | 0.061  |
| ENSG00000169495 | <i>HTRA4</i>   | 1.14E-02 | 1.113  | 0.013  | 0.061  |
| ENSG00000090339 | <i>ICAM1</i>   | 3.33E-28 | 1.765  | 0.528  | 0.782  |
| ENSG00000160223 | <i>ICOSLG</i>  | 5.86E-07 | 1.466  | 0.669  | 0.667  |
| ENSG00000131203 | <i>IDO1</i>    | 3.66E-03 | 2.037  | 0.014  | 0.039  |
| ENSG00000068079 | <i>IFI35</i>   | 3.00E-04 | 1.172  | 0.427  | 0.544  |
| ENSG00000103742 | <i>IGDCC4</i>  | 1.76E-07 | -1.160 | -0.255 | -0.449 |
| ENSG00000146678 | <i>IGFBP1</i>  | 7.61E-10 | 1.294  | 0.405  | 0.741  |
| ENSG00000134470 | <i>IL15RA</i>  | 2.63E-10 | 1.622  | 0.674  | 0.573  |
| ENSG00000115604 | <i>IL18R1</i>  | 9.66E-10 | 1.346  | 0.616  | 0.799  |
| ENSG00000115602 | <i>IL1RL1</i>  | 3.15E-08 | 1.087  | 0.039  | 0.597  |
| ENSG00000136689 | <i>IL1RN</i>   | 1.69E-03 | 1.066  | 0.011  | 0.016  |
| ENSG00000142677 | <i>IL22RA1</i> | 2.27E-02 | -1.101 | -0.017 | -0.023 |
| ENSG00000008517 | <i>IL32</i>    | 3.73E-13 | 1.719  | 0.582  | 1.167  |
| ENSG00000137033 | <i>IL33</i>    | 6.84E-20 | 1.898  | 0.719  | 1.047  |
| ENSG00000136696 | <i>IL36B</i>   | 1.92E-08 | 1.541  | 0.053  | 1.105  |
| ENSG00000136695 | <i>IL36RN</i>  | 1.66E-04 | 1.555  | 0.015  | 0.067  |
| ENSG00000104951 | <i>IL4I1</i>   | 2.17E-04 | 1.627  | 0.014  | 1.354  |
| ENSG00000136244 | <i>IL6</i>     | 6.10E-23 | 5.532  | 2.586  | 3.071  |
| ENSG00000168685 | <i>IL7R</i>    | 4.60E-04 | 1.031  | 0.049  | 0.440  |
| ENSG00000125347 | <i>IRF1</i>    | 2.57E-22 | 1.183  | 0.537  | 0.655  |

|                 |                  |          |        |        |        |
|-----------------|------------------|----------|--------|--------|--------|
| ENSG00000137265 | <i>IRF4</i>      | 2.31E-03 | 1.058  | 0.018  | 0.048  |
| ENSG00000128604 | <i>IRF5</i>      | 5.34E-03 | 1.522  | 0.019  | 0.042  |
| ENSG00000091409 | <i>ITGA6</i>     | 1.52E-12 | -1.016 | -0.498 | -0.758 |
| ENSG00000105855 | <i>ITGB8</i>     | 1.79E-10 | 1.019  | 0.399  | 0.476  |
| ENSG00000105639 | <i>JAK3</i>      | 3.98E-07 | 1.728  | 0.758  | 0.817  |
| ENSG00000158445 | <i>KCNB1</i>     | 1.02E-04 | -1.076 | -0.020 | -0.023 |
| ENSG00000143473 | <i>KCNHI</i>     | 8.53E-04 | 1.229  | 0.025  | 0.635  |
| ENSG00000184156 | <i>KCNQ3</i>     | 2.56E-06 | 1.361  | 0.589  | 0.839  |
| ENSG00000157404 | <i>KIT</i>       | 1.25E-05 | -1.175 | -0.031 | -0.502 |
| ENSG00000239474 | <i>KLHL41</i>    | 8.44E-18 | -1.099 | -0.474 | -0.639 |
| ENSG00000170454 | <i>KRT75</i>     | 9.33E-06 | 1.836  | 0.025  | 0.846  |
| ENSG00000115919 | <i>KYNU</i>      | 3.00E-17 | 1.320  | 0.632  | 0.813  |
| ENSG00000179630 | <i>LACCI</i>     | 6.12E-09 | 1.035  | 0.342  | 0.523  |
| ENSG00000129988 | <i>LBP</i>       | 5.74E-10 | 4.020  | 0.014  | 1.532  |
| ENSG00000169744 | <i>LDB2</i>      | 2.01E-22 | -1.345 | -0.330 | -0.280 |
| ENSG00000174697 | <i>LEP</i>       | 5.90E-08 | 3.769  | 0.013  | 1.784  |
| ENSG00000128342 | <i>LIF</i>       | 3.24E-19 | 1.799  | 0.512  | 0.661  |
| ENSG00000236882 | <i>LINC01554</i> | 7.50E-03 | 2.247  | 0.011  | 0.036  |
| ENSG00000178734 | <i>LMO7DN</i>    | 1.99E-04 | -1.012 | -0.789 | -0.667 |
| ENSG00000163431 | <i>LMOD1</i>     | 4.54E-26 | -2.020 | -0.658 | -0.847 |
| ENSG00000111684 | <i>LPCAT3</i>    | 4.25E-29 | 1.076  | 0.548  | 0.745  |
| ENSG00000165379 | <i>LRFN5</i>     | 5.92E-13 | -1.251 | -0.066 | -0.588 |
| ENSG00000173114 | <i>LRRN3</i>     | 1.60E-12 | -1.017 | -0.627 | -0.700 |
| ENSG00000162951 | <i>LRRTM1</i>    | 3.74E-02 | 1.511  | 0.012  | 0.035  |
| ENSG00000172901 | <i>LVRN</i>      | 2.28E-05 | 1.187  | 0.023  | 0.132  |
| ENSG00000165072 | <i>MAMDC2</i>    | 1.92E-05 | -1.019 | -0.032 | -0.330 |
| ENSG00000107968 | <i>MAP3K8</i>    | 2.92E-45 | 1.692  | 1.346  | 1.484  |
| ENSG00000081189 | <i>MEF2C</i>     | 1.32E-09 | -1.091 | -0.308 | -0.611 |
| ENSG00000005102 | <i>MEOX1</i>     | 3.34E-03 | 1.052  | -0.004 | 0.005  |
| ENSG00000106511 | <i>MEOX2</i>     | 2.90E-07 | -1.495 | -0.031 | -0.180 |
| ENSG00000106484 | <i>MEST</i>      | 5.39E-15 | -1.346 | -0.503 | -0.673 |
| ENSG00000185432 | <i>METTL7A</i>   | 2.94E-13 | -1.075 | -0.401 | -0.611 |
| ENSG00000168389 | <i>MFSD2A</i>    | 2.74E-04 | 1.450  | 0.015  | 0.069  |
| ENSG00000111341 | <i>MGP</i>       | 3.90E-13 | -1.158 | -0.466 | -0.652 |
| ENSG00000108960 | <i>MMD</i>       | 2.26E-21 | 1.029  | 0.409  | 0.588  |
| ENSG00000196611 | <i>MMP1</i>      | 6.39E-18 | 3.020  | 0.876  | 1.393  |
| ENSG00000166670 | <i>MMP10</i>     | 4.41E-06 | 1.390  | 0.020  | 0.753  |
| ENSG00000149968 | <i>MMP3</i>      | 3.27E-14 | 2.020  | 0.051  | 0.916  |
| ENSG00000082126 | <i>MPP4</i>      | 2.46E-02 | -1.057 | -0.022 | -0.068 |
| ENSG00000072952 | <i>MRVII</i>     | 6.13E-14 | -1.613 | -0.045 | -0.159 |

|                 |                |           |        |        |        |
|-----------------|----------------|-----------|--------|--------|--------|
| ENSG00000178860 | <i>MSC</i>     | 1.72E-14  | 1.255  | 0.255  | 0.436  |
| ENSG00000138379 | <i>MSTN</i>    | 1.45E-09  | -2.534 | -0.045 | -0.687 |
| ENSG00000120149 | <i>MSX2</i>    | 2.74E-09  | 1.079  | 0.090  | 0.580  |
| ENSG00000169715 | <i>MT1E</i>    | 1.37E-18  | 1.151  | 0.438  | 0.631  |
| ENSG00000198417 | <i>MT1F</i>    | 1.73E-02  | 1.132  | 0.007  | 0.031  |
| ENSG00000125144 | <i>MT1G</i>    | 3.17E-06  | 2.363  | 0.018  | 0.047  |
| ENSG00000187193 | <i>MT1X</i>    | 9.02E-21  | 1.646  | 0.534  | 0.946  |
| ENSG00000125148 | <i>MT2A</i>    | 9.47E-13  | 1.399  | 0.390  | 0.705  |
| ENSG00000183486 | <i>MX2</i>     | 6.01E-03  | 2.070  | 1.135  | 0.034  |
| ENSG00000136449 | <i>MYCBPAP</i> | 4.20E-02  | -1.452 | -0.004 | -0.009 |
| ENSG00000034971 | <i>MYOC</i>    | 1.07E-20  | -1.110 | -0.592 | -0.780 |
| ENSG00000101605 | <i>MYOM1</i>   | 3.38E-05  | -1.389 | -0.036 | -1.203 |
| ENSG00000105835 | <i>NAMPT</i>   | 2.76E-13  | 2.208  | 0.039  | 0.758  |
| ENSG00000176771 | <i>NCKAP5</i>  | 1.34E-02  | -1.281 | -0.012 | -0.030 |
| ENSG00000124479 | <i>NDP</i>     | 1.92E-15  | 2.278  | 0.850  | 1.032  |
| ENSG00000167604 | <i>NFKBID</i>  | 3.08E-08  | 1.137  | 0.793  | 1.091  |
| ENSG00000144802 | <i>NFKBIZ</i>  | 2.09E-163 | 3.681  | 2.950  | 3.025  |
| ENSG00000204131 | <i>NHSL2</i>   | 1.19E-03  | -1.201 | -0.020 | -0.110 |
| ENSG00000166741 | <i>NNMT</i>    | 1.46E-29  | 2.315  | 1.196  | 1.540  |
| ENSG00000183691 | <i>NOG</i>     | 2.85E-05  | 1.411  | 0.037  | 0.924  |
| ENSG00000171246 | <i>NPTX1</i>   | 1.16E-11  | -1.203 | -0.437 | -0.680 |
| ENSG00000182575 | <i>NXPH3</i>   | 2.54E-04  | -1.157 | -0.006 | -0.018 |
| ENSG00000177989 | <i>ODF3B</i>   | 3.64E-08  | 1.190  | 0.042  | 0.687  |
| ENSG00000125510 | <i>OPRL1</i>   | 3.71E-02  | -1.259 | -0.007 | -0.041 |
| ENSG00000145623 | <i>OSMR</i>    | 2.03E-19  | 1.335  | 0.513  | 0.710  |
| ENSG00000187950 | <i>OVCHI</i>   | 9.50E-03  | 1.398  | 0.018  | 0.035  |
| ENSG00000243444 | <i>PALM2</i>   | 7.00E-07  | 1.195  | 0.059  | 0.614  |
| ENSG00000138496 | <i>PARP9</i>   | 5.02E-05  | 1.118  | 0.752  | 0.673  |
| ENSG00000175426 | <i>PCSK1</i>   | 5.06E-03  | 1.197  | 0.014  | 0.047  |
| ENSG00000115252 | <i>PDE1A</i>   | 1.13E-16  | -1.013 | -0.313 | -0.530 |
| ENSG00000113448 | <i>PDE4D</i>   | 1.97E-07  | 2.047  | 0.024  | 0.907  |
| ENSG00000138735 | <i>PDE5A</i>   | 1.28E-26  | -1.500 | -0.452 | -0.633 |
| ENSG00000162493 | <i>PDPN</i>    | 1.10E-32  | 1.809  | 0.745  | 1.046  |
| ENSG00000109272 | <i>PF4V1</i>   | 2.61E-02  | 1.309  | 0.001  | 0.031  |
| ENSG00000114268 | <i>PFKFB4</i>  | 1.61E-04  | 1.331  | 0.014  | 0.057  |
| ENSG00000119630 | <i>PGF</i>     | 3.04E-15  | 1.985  | 0.034  | 1.013  |
| ENSG00000153823 | <i>PID1</i>    | 3.84E-08  | 1.598  | 0.034  | 0.528  |
| ENSG00000122861 | <i>PLAU</i>    | 2.46E-04  | 1.060  | 0.045  | 0.748  |
| ENSG00000115896 | <i>PLCL1</i>   | 1.06E-13  | -1.576 | -0.846 | -0.974 |
| ENSG00000075651 | <i>PLD1</i>    | 3.55E-07  | 1.400  | 0.025  | 0.406  |

|                 |                 |          |        |        |        |
|-----------------|-----------------|----------|--------|--------|--------|
| ENSG00000147872 | <i>PLIN2</i>    | 3.26E-10 | 1.020  | 0.064  | 0.356  |
| ENSG00000188313 | <i>PLSCR1</i>   | 4.31E-08 | 1.150  | 0.754  | 0.843  |
| ENSG00000221866 | <i>PLXNA4</i>   | 1.04E-03 | 1.046  | 0.013  | 0.099  |
| ENSG00000141682 | <i>PMAIP1</i>   | 8.72E-09 | 1.447  | 0.065  | 0.728  |
| ENSG00000028277 | <i>POU2F2</i>   | 6.86E-36 | 2.188  | 1.344  | 1.434  |
| ENSG00000158528 | <i>PPP1R9A</i>  | 1.64E-03 | -1.531 | -0.017 | -0.045 |
| ENSG00000156475 | <i>PPP2R2B</i>  | 4.73E-05 | -1.987 | -0.028 | -0.973 |
| ENSG00000061455 | <i>PRDM6</i>    | 1.51E-03 | -1.144 | -0.022 | -0.049 |
| ENSG00000186652 | <i>PRG2</i>     | 2.76E-06 | 1.052  | 0.052  | 0.519  |
| ENSG00000146250 | <i>PRSS35</i>   | 8.58E-12 | -1.544 | -0.732 | -0.766 |
| ENSG00000140368 | <i>PSTPIP1</i>  | 2.99E-02 | 0.150  | 0.014  | 1.586  |
| ENSG00000117425 | <i>PTCH2</i>    | 2.14E-03 | -1.028 | -0.022 | -0.119 |
| ENSG00000148344 | <i>PTGES</i>    | 2.40E-13 | 1.121  | 0.075  | 0.366  |
| ENSG00000122420 | <i>PTGFR</i>    | 6.82E-26 | 1.698  | 0.727  | 0.921  |
| ENSG00000073756 | <i>PTGS2</i>    | 4.12E-09 | 1.958  | 0.036  | 0.659  |
| ENSG00000163661 | <i>PTX3</i>     | 7.13E-07 | 1.178  | 0.563  | 0.854  |
| ENSG00000041353 | <i>RAB27B</i>   | 1.26E-03 | 1.077  | 0.020  | 0.088  |
| ENSG00000108551 | <i>RASD1</i>    | 3.87E-06 | 1.895  | 0.018  | 0.645  |
| ENSG00000198774 | <i>RASSF9</i>   | 8.29E-09 | -1.655 | -0.727 | -1.054 |
| ENSG00000088320 | <i>REMI</i>     | 2.15E-06 | -1.622 | 0.000  | -0.078 |
| ENSG00000117152 | <i>RGS4</i>     | 1.50E-06 | -2.045 | -0.678 | -1.080 |
| ENSG00000108370 | <i>RGS9</i>     | 2.26E-06 | -1.121 | -0.389 | -0.535 |
| ENSG00000143878 | <i>RHOB</i>     | 1.75E-07 | 1.491  | 0.025  | 0.503  |
| ENSG00000072422 | <i>RHOBTB1</i>  | 5.90E-10 | -1.219 | -0.297 | -0.273 |
| ENSG00000126785 | <i>RHOJ</i>     | 2.09E-06 | -1.163 | -0.039 | -0.076 |
| ENSG00000079841 | <i>RIMS1</i>    | 4.57E-04 | -1.113 | -0.032 | -0.486 |
| ENSG00000042062 | <i>RIPOR3</i>   | 2.99E-14 | 1.877  | 0.466  | 0.738  |
| ENSG00000169071 | <i>ROR2</i>     | 2.80E-05 | 1.070  | 0.020  | 0.077  |
| ENSG00000134321 | <i>RSAD2</i>    | 1.48E-04 | 2.810  | 1.313  | 0.043  |
| ENSG00000186907 | <i>RTN4RL2</i>  | 1.03E-22 | 1.886  | 0.670  | 0.897  |
| ENSG00000102445 | <i>RUBCNL</i>   | 7.49E-23 | 1.805  | 0.861  | 1.156  |
| ENSG00000231274 | <i>SBK3</i>     | 3.88E-05 | 1.810  | 0.020  | 1.017  |
| ENSG00000064932 | <i>SBNO2</i>    | 2.54E-24 | 1.187  | 0.443  | 0.642  |
| ENSG00000170381 | <i>SEMA3E</i>   | 9.66E-15 | -1.005 | -0.325 | -0.501 |
| ENSG00000197632 | <i>SERPINB2</i> | 1.26E-26 | 2.110  | 0.628  | 1.076  |
| ENSG00000102683 | <i>SGCG</i>     | 3.28E-04 | -1.620 | -0.018 | -0.545 |
| ENSG00000164690 | <i>SHH</i>      | 1.80E-06 | 1.846  | 0.028  | 1.085  |
| ENSG00000142178 | <i>SIK1</i>     | 1.11E-05 | 1.118  | 0.020  | 0.246  |
| ENSG00000141469 | <i>SLC14A1</i>  | 9.79E-05 | -1.217 | -0.021 | -0.072 |
| ENSG00000110446 | <i>SLC15A3</i>  | 1.02E-03 | 1.072  | 0.026  | 0.134  |

|                 |                 |          |        |        |        |
|-----------------|-----------------|----------|--------|--------|--------|
| ENSG00000118596 | <i>SLC16A7</i>  | 1.80E-15 | 1.335  | 0.367  | 0.267  |
| ENSG00000135917 | <i>SLC19A3</i>  | 4.07E-17 | 2.331  | 0.577  | 0.831  |
| ENSG00000137266 | <i>SLC22A23</i> | 1.69E-14 | 1.005  | 0.350  | 0.472  |
| ENSG00000185052 | <i>SLC24A3</i>  | 3.17E-08 | 1.601  | 0.043  | 0.709  |
| ENSG00000140284 | <i>SLC27A2</i>  | 3.29E-02 | 1.586  | 0.007  | 0.039  |
| ENSG00000142583 | <i>SLC2A5</i>   | 7.20E-24 | 1.277  | 0.506  | 0.798  |
| ENSG00000169507 | <i>SLC38A11</i> | 2.79E-02 | -1.491 | -0.006 | -0.028 |
| ENSG00000104635 | <i>SLC39A14</i> | 9.59E-05 | 1.293  | 0.021  | 0.076  |
| ENSG00000138821 | <i>SLC39A8</i>  | 2.09E-06 | 2.061  | 0.014  | 0.058  |
| ENSG00000138449 | <i>SLC40A1</i>  | 4.85E-15 | -1.246 | -0.520 | -0.797 |
| ENSG00000167703 | <i>SLC43A2</i>  | 4.18E-14 | 1.934  | 0.659  | 0.931  |
| ENSG00000134802 | <i>SLC43A3</i>  | 1.73E-17 | 1.011  | 0.307  | 0.486  |
| ENSG00000003989 | <i>SLC7A2</i>   | 3.90E-18 | 2.875  | 1.107  | 1.566  |
| ENSG00000155465 | <i>SLC7A7</i>   | 6.15E-06 | 1.080  | 0.602  | 0.574  |
| ENSG00000184557 | <i>SOCS3</i>    | 1.48E-19 | 1.343  | 0.322  | 0.631  |
| ENSG00000112096 | <i>SOD2</i>     | 6.72E-07 | 1.756  | 0.030  | 0.595  |
| ENSG00000112096 | <i>SOD2-OT1</i> | 6.72E-07 | 1.756  | 0.030  | 0.595  |
| ENSG00000137767 | <i>SQOR</i>     | 3.26E-19 | 1.068  | 0.536  | 0.701  |
| ENSG00000122862 | <i>SRGN</i>     | 3.45E-17 | 1.112  | 0.055  | 0.352  |
| ENSG00000115415 | <i>STAT1</i>    | 3.46E-12 | 1.004  | 0.628  | 0.739  |
| ENSG00000138378 | <i>STAT4</i>    | 3.57E-13 | 1.978  | 0.967  | 1.474  |
| ENSG00000159167 | <i>STC1</i>     | 1.14E-22 | 2.934  | 1.167  | 1.536  |
| ENSG00000164647 | <i>STEAP1</i>   | 4.95E-24 | 1.721  | 0.754  | 0.971  |
| ENSG00000157214 | <i>STEAP2</i>   | 1.74E-09 | 1.548  | 0.591  | 0.731  |
| ENSG00000127954 | <i>STEAP4</i>   | 1.62E-04 | 1.337  | 0.583  | 0.965  |
| ENSG00000140022 | <i>STON2</i>    | 1.76E-04 | 1.055  | 0.396  | 0.331  |
| ENSG00000128578 | <i>STRIP2</i>   | 5.19E-16 | 1.702  | 0.558  | 0.844  |
| ENSG00000170921 | <i>TANC2</i>    | 2.21E-28 | -1.005 | -0.482 | -0.673 |
| ENSG00000170379 | <i>TCAF2</i>    | 2.47E-03 | 1.055  | 0.005  | 0.021  |
| ENSG00000176907 | <i>TCIM</i>     | 7.51E-03 | 1.850  | 0.008  | 0.022  |
| ENSG00000197905 | <i>TEAD4</i>    | 1.08E-08 | 1.127  | 0.069  | 0.586  |
| ENSG00000105825 | <i>TFPI2</i>    | 2.05E-19 | 2.438  | 0.907  | 1.345  |
| ENSG00000038295 | <i>TLL1</i>     | 6.70E-07 | -1.060 | -0.405 | -0.485 |
| ENSG00000137462 | <i>TLR2</i>     | 8.72E-09 | 2.258  | 0.010  | 0.050  |
| ENSG00000183160 | <i>TMEM119</i>  | 2.21E-28 | -1.188 | -0.414 | -0.454 |
| ENSG00000139364 | <i>TMEM132B</i> | 3.37E-05 | 1.255  | 0.023  | 0.076  |
| ENSG00000164124 | <i>TMEM144</i>  | 3.53E-03 | 1.019  | 0.025  | 0.051  |
| ENSG00000249992 | <i>TMEM158</i>  | 2.35E-08 | 1.493  | 0.446  | 0.865  |
| ENSG00000196932 | <i>TMEM26</i>   | 5.87E-04 | -1.396 | -0.022 | -0.079 |
| ENSG00000182107 | <i>TMEM30B</i>  | 5.16E-19 | -1.018 | -0.332 | -0.558 |

|                 |                 |          |        |        |        |
|-----------------|-----------------|----------|--------|--------|--------|
| ENSG00000133687 | <i>TMTC1</i>    | 2.39E-15 | 1.015  | 0.325  | 0.454  |
| ENSG00000185215 | <i>TNFAIP2</i>  | 8.69E-18 | 1.371  | 0.457  | 0.602  |
| ENSG00000123610 | <i>TNFAIP6</i>  | 4.04E-12 | 3.429  | 0.822  | 1.478  |
| ENSG00000127863 | <i>TNFRSF19</i> | 1.64E-09 | -1.236 | -0.049 | -0.198 |
| ENSG00000028137 | <i>TNFRSF1B</i> | 1.84E-14 | 1.273  | 0.460  | 0.680  |
| ENSG00000125735 | <i>TNFSF14</i>  | 3.42E-04 | 2.187  | 0.008  | 0.030  |
| ENSG00000111907 | <i>TPD52L1</i>  | 4.27E-17 | -1.066 | -0.367 | -0.469 |
| ENSG00000124731 | <i>TREM1</i>    | 3.10E-06 | 2.256  | 0.013  | 0.053  |
| ENSG00000173334 | <i>TRIB1</i>    | 2.06E-08 | 1.277  | 0.036  | 0.554  |
| ENSG00000158022 | <i>TRIM63</i>   | 1.98E-02 | -1.277 | -0.020 | -0.047 |
| ENSG00000104321 | <i>TRPA1</i>    | 1.66E-03 | 1.046  | 0.020  | 0.083  |
| ENSG00000182463 | <i>TSHZ2</i>    | 5.00E-10 | 1.054  | 0.329  | 0.499  |
| ENSG00000025708 | <i>TYMP</i>     | 7.04E-39 | 2.023  | 1.057  | 1.337  |
| ENSG00000162692 | <i>VCAM1</i>    | 8.74E-07 | 1.198  | 0.035  | 0.191  |
| ENSG00000170162 | <i>VGLL2</i>    | 6.70E-03 | 1.047  | 0.013  | 0.084  |
| ENSG00000119703 | <i>ZC2HC1C</i>  | 6.46E-03 | 1.671  | 0.014  | 0.032  |
| ENSG00000163874 | <i>ZC3H12A</i>  | 2.17E-47 | 3.152  | 2.226  | 2.377  |
| ENSG00000144331 | <i>ZNF385B</i>  | 1.52E-10 | -1.205 | -0.315 | -0.284 |

**Supplementary Table 6.** Results from GSEA Hallmark pathway analysis. (A) Overview of hallmark pathways significantly ( $p_{adj} < 0.05$ ) changed by IL-17 treatment, with the normalised enrichment score (NES) in **black** for an increase in NES and **red** for decreases in NES.

| Pathway                           | Chondrocytes |         |        | Synovial fibroblasts |         |        |
|-----------------------------------|--------------|---------|--------|----------------------|---------|--------|
|                                   | IL-17A       | IL-17AF | IL-17F | IL-17A               | IL-17AF | IL-17F |
| Allograft Rejection               | 2.43         | 2.10    | 1.83   | 2.35                 | 1.86    | 1.98   |
| Angiogenesis                      | 1.98         | 2.09    | 2.00   | 1.75                 |         | 1.80   |
| Apical Junction                   |              |         | -1.55  |                      |         |        |
| Apoptosis                         | 2.04         | 1.80    |        |                      |         |        |
| Bile Acid Metabolism              |              |         |        | 1.78                 |         |        |
| Coagulation                       | 2.03         | 2.05    | 1.74   | 1.87                 | 1.70    |        |
| Complement                        | 2.46         | 2.30    | 1.98   | 2.24                 | 2.14    | 2.06   |
| Epithelial Mesenchymal Transition | 2.31         | 2.19    | 1.79   | 1.77                 | 1.78    | 1.82   |
| Estrogen Response Early           | 1.71         | 1.75    |        |                      |         |        |
| Glycolysis                        | 2.28         | 2.06    | 1.75   | 1.66                 |         |        |
| Heme Metabolism                   |              | 1.55    |        |                      |         |        |
| Hypoxia                           | 2.71         | 2.59    | 1.92   | 2.05                 | 1.63    |        |
| Il2 Stat5 Signaling               | 2.36         | 1.90    | 1.76   | 1.69                 |         | 1.64   |
| Il6 Jak Stat3 Signaling           | 2.59         | 2.54    | 2.10   | 2.42                 | 2.20    | 2.09   |
| Inflammatory Response             | 3.20         | 2.88    | 2.28   | 2.88                 | 2.37    | 2.26   |
| Interferon Alpha Response         | 2.28         | 1.87    |        | 2.04                 | 1.99    | 1.97   |
| Interferon Gamma Response         | 2.85         | 2.61    | 2.24   | 2.73                 | 2.37    | 2.25   |
| Kras Signaling Dn                 |              |         | -1.65  |                      |         |        |
| Kras Signaling Up                 | 2.34         | 1.99    | 1.74   | 2.28                 | 1.80    |        |
| Mitotic Spindle                   |              |         |        |                      | -1.64   |        |
| Mtorc1 Signaling                  | 2.09         | 2.03    | 1.53   | 1.78                 |         |        |
| Myc Targets V1                    | 1.56         | 2.02    | 1.81   | 1.70                 |         |        |
| Myc Targets V2                    |              |         |        | 1.75                 |         |        |
| Myogenesis                        |              |         | -1.61  | -1.97                | -1.82   | -1.87  |
| Oxidative Phosphorylation         |              | 1.59    |        |                      |         |        |
| Reactive Oxygen Species Pathway   |              | 1.70    | 1.77   |                      |         |        |
| Tnfa Signaling Via Nfkb           | 3.43         | 3.27    | 2.60   | 2.95                 | 2.46    | 2.35   |
| Unfolded Protein Response         | 1.98         | 1.93    |        |                      |         |        |
| Uv Response Up                    | 2.41         | 2.38    | 1.92   | 1.80                 | -1.59   |        |
| Xenobiotic Metabolism             | 2.07         | 2.09    | 1.70   |                      |         |        |
